# Supplementary material for: Aetiology and prognostic risk factors of mortality in patients with pneumonia receiving glucocorticoids alone or glucocorticoids and other immunosuppressants: a retrospective cohort study
Source: PubMed Central journal article supplement — BMJ Open. 2020 Oct 27;10(10):e037419. doi: 10.1136/bmjopen-2020-037419 (PMC7592294; doi:10.1136/bmjopen-2020-037419), 2020-10-27
Supplement: bmjopen-2020-037419.draft_revisions.pdf [file bmjopen-2020-037419.draft_revisions.pdf]

# BMJ Open

BMJ Open is committed to open peer review. As part of this commitment we make the peer review history of every article we publish publicly available.

When an article is published we post the peer reviewers' comments and the authors' responses online. We also post the versions of the paper that were used during peer review. These are the versions that the peer review comments apply to.

The versions of the paper that follow are the versions that were submitted during the peer review process. They are not the versions of record or the final published versions. They should not be cited or distributed as the published version of this manuscript.

BMJ Open is an open access journal and the full, final, typeset and author-corrected version of record of the manuscript is available on our site with no access controls, subscription charges or pay-per-view fees (<http://bmjopen.bmj.com>).

If you have any questions on BMJ Open's open peer review process please email [info.bmjopen@bmj.com](mailto:info.bmjopen@bmj.com)

# BMJ Open

## Etiology and prognostic risk factors of mortality among pneumonia patients receiving long-term glucocorticoids: a retrospective cohort study

|                               |                                                                                                                                                                                                                                                                                                                                                                                                                                                                                                                                                                                                                                                                                                                                                                                              |
|-------------------------------|----------------------------------------------------------------------------------------------------------------------------------------------------------------------------------------------------------------------------------------------------------------------------------------------------------------------------------------------------------------------------------------------------------------------------------------------------------------------------------------------------------------------------------------------------------------------------------------------------------------------------------------------------------------------------------------------------------------------------------------------------------------------------------------------|
| Journal:                      | <i>BMJ Open</i>                                                                                                                                                                                                                                                                                                                                                                                                                                                                                                                                                                                                                                                                                                                                                                              |
| Manuscript ID                 | bmjopen-2020-037419                                                                                                                                                                                                                                                                                                                                                                                                                                                                                                                                                                                                                                                                                                                                                                          |
| Article Type:                 | Original research                                                                                                                                                                                                                                                                                                                                                                                                                                                                                                                                                                                                                                                                                                                                                                            |
| Date Submitted by the Author: | 04-Feb-2020                                                                                                                                                                                                                                                                                                                                                                                                                                                                                                                                                                                                                                                                                                                                                                                  |
| Complete List of Authors:     | Li, Lijuan; China-Japan Friendship Hospital, Hsu, Steven H.; Houston Methodist Hospital<br>Gu, Xiaoying; China-Japan Friendship Hospital<br>Jiang, Shan; China-Japan Friendship Hospital<br>Shang, Lianhan; China-Japan Friendship Hospital<br>Sun, Guolei; China-Japan Friendship Hospital<br>Sun, Lingxiao; China-Japan Friendship Hospital<br>Zhang, Li; China-Japan Friendship Hospital<br>Wang, Chuan; First Hospital of Shijiazhuang<br>Ren, Yali; Second Hospital of Hebei Medical University<br>Wang, Jingxiang; Capital Medical University, respiratory and critical care medicine, Beijing Luhe Hospital<br>Pan, Jianliang; Second People's Hospital of Weifang<br>Liu, Jiangbo<br>Bin, Cao; China-Japan Friendship Hospital, Department of Respiratory and Critical Care Medicine |
| Keywords:                     | INFECTIOUS DISEASES, Adult intensive & critical care < INTENSIVE & CRITICAL CARE, Diagnostic microbiology < INFECTIOUS DISEASES, Infection control < INFECTIOUS DISEASES                                                                                                                                                                                                                                                                                                                                                                                                                                                                                                                                                                                                                     |
|                               |                                                                                                                                                                                                                                                                                                                                                                                                                                                                                                                                                                                                                                                                                                                                                                                              |

SCHOLARONE™  
Manuscripts

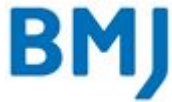

I, the Submitting Author has the right to grant and does grant on behalf of all authors of the Work (as defined in the below author licence), an exclusive licence and/or a non-exclusive licence for contributions from authors who are: i) UK Crown employees; ii) where BMJ has agreed a CC-BY licence shall apply, and/or iii) in accordance with the terms applicable for US Federal Government officers or employees acting as part of their official duties; on a worldwide, perpetual, irrevocable, royalty-free basis to BMJ Publishing Group Ltd ("BMJ") its licensees and where the relevant Journal is co-owned by BMJ to the co-owners of the Journal, to publish the Work in this journal and any other BMJ products and to exploit all rights, as set out in our [licence](#).

The Submitting Author accepts and understands that any supply made under these terms is made by BMJ to the Submitting Author unless you are acting as an employee on behalf of your employer or a postgraduate student of an affiliated institution which is paying any applicable article publishing charge ("APC") for Open Access articles. Where the Submitting Author wishes to make the Work available on an Open Access basis (and intends to pay the relevant APC), the terms of reuse of such Open Access shall be governed by a Creative Commons licence – details of these licences and which [Creative Commons](#) licence will apply to this Work are set out in our licence referred to above.

Other than as permitted in any relevant BMJ Author's Self Archiving Policies, I confirm this Work has not been accepted for publication elsewhere, is not being considered for publication elsewhere and does not duplicate material already published. I confirm all authors consent to publication of this Work and authorise the granting of this licence.

1  
2  
3  
4 **Etiology and prognostic risk factors of mortality among pneumonia**  
5  
6 **patients receiving long-term glucocorticoids: a retrospective cohort**  
7  
8 **study**  
9  
10

11  
12  
13 Lijuan Li<sup>1</sup>, Steven H. Hsu<sup>2</sup>, Xiaoying Gu<sup>3</sup>, Shan Jiang<sup>1</sup>, Lianhan Shang<sup>1</sup>, Guolei Sun<sup>1</sup>, Lingxiao Sun<sup>4</sup>, Li Zhang<sup>1</sup>,  
14 Chuan Wang<sup>5</sup>, Yali Ren<sup>6</sup>, Jinxiang Wang<sup>7</sup>, Jianliang Pan<sup>8</sup>, Jiangbo Liu<sup>9</sup>, Bin Cao<sup>1,10,11</sup>  
15  
16

17  
18  
19 *1. Department of Pulmonary and Critical Care Medicine, National Center for Clinical Research on Respiratory*  
20 *Diseases, China-Japan Friendship Hospital, Beijing 100029, China*  
21

22  
23 *2. Department of Medicine, Houston Methodist Hospital, Houston, TX 77030, USA*  
24

25 *3. Department of Institute of Clinical Medical Sciences, China-Japan Friendship Hospital, Institute of Respiratory*  
26 *Medicine, Chinese Academy of Medical Science, National Clinical Research Center of Respiratory Diseases,*  
27 *Beijing 100029, China*  
28

29  
30 *4. Clinical Center for Pulmonary Infections, Capital Medical University, Beijing 100029, China*  
31

32  
33 *5. Department of Pulmonary and Critical Care Medicine, First Hospital of Shijiazhuang, Shijiazhuang 050011,*  
34 *China*  
35

36  
37 *6. Department of Pulmonary and Critical Care Medicine, Second Hospital of Hebei Medical University,*  
38 *Shijiazhuang 050000, China*  
39

40  
41 *7. Department of Respiratory and Critical Care Medicine, Beijing Luhe Hospital of Capital Medical University,*  
42 *Beijing 101100, China*  
43

44  
45 *8. Department of Pulmonary and Critical Care Medicine, Second People's Hospital of Weifang, Weifang 261041,*  
46 *China*  
47

48  
49 *9. Department of Pulmonary and Critical Care Medicine, Tianjin First Central Hospital, Tianjin 300192, China*  
50

51  
52 *10. Institute of Respiratory Medicine, Chinese Academy of Medical Science, Beijing 100029, China*  
53

54  
55 *11. Tsinghua University-Peking University Joint Center for Life Sciences, Beijing, China*  
56

56  
57 \* Corresponding author: Bin Cao, caobin\_ben@163.com, Department of Pulmonary and Critical  
58 Care Medicine, China-Japan Friendship Hospital; Laboratory of Clinical Microbiology and  
59 Infectious Diseases; Institute of Respiratory Medicine, Chinese Academy of Medical Science;  
60 National Clinical Research Center of Respiratory Diseases, Clinical Center for Pulmonary

1  
2  
3  
4 Infections, Capital Medical University; Tsinghua University-Peking University Joint Center for Life  
5 Sciences, Beijing 100029, China  
6  
7  
8  
9  
10

11 **Word Count:** 2805  
12  
13  
14  
15  
16

## 17 **ABSTRACT**

18  
19 **Objective:** Long-term use of high dose glucocorticoids may result in severe immunosuppression,  
20 a high risk of treatment-resistant pneumonia, and high mortality. In this study, we investigated the  
21 etiology and prognostic risk factors of mortality in hospitalized patients with pneumonia and  
22 receiving long-term glucocorticoid therapy.  
23  
24  
25  
26

27 **Design:** Retrospective cohort study  
28

29 **Setting:** Six secondary and tertiary academic hospitals in China  
30

31 **Participants:** Patients undergoing treatment with long-term glucocorticoids who were  
32 hospitalized with pneumonia between 1<sup>st</sup> January 2013 and 31<sup>st</sup> December 2019.  
33  
34

35 **Primary and Secondary Outcomes:** Prevalence of comorbidities, microbiology and antibiotic  
36 susceptibility patterns, 30-day and 90-day mortality. Prognostic risk factors were analyzed.  
37  
38

39 **Results:** A total of 614 patients were included in this study, pathogens were identified in 66.9% of  
40 patients. Patients experienced significant morbidity, with 44.8% developing respiratory failure,  
41 41.5% requiring intensive care unit (ICU) transfer, 24.4% requiring invasive mechanical  
42 ventilation, 25.1% requiring noninvasive mechanical ventilation, and 4.2% requiring  
43 extracorporeal membrane oxygenation. The 90-day mortality was 26.7%. Diagnosis of pneumonia  
44 occurred within 6 months of glucocorticoid initiation for 69.7% of patients with *Cytomegalovirus*  
45 (CMV) pneumonia and 78.4% of patients with *Pneumocystis jirovecii* pneumonia (PCP).  
46 Pathogens (PCP, CMV, and multidrug resistant bacteria) were identified more frequently in  
47 patients with persistent lymphocytopenia and high-dose glucocorticoid use group. For non-CMV  
48 virus pneumonia, the 90-day mortality was similar as patients with PCP and CMV (29.2% vs  
49 37.2% vs 26.4%,  $P>0.05$ ). Cox regression analysis indicated that septic shock, respiratory failure,  
50 high-dose steroids, and persistent lymphocytopenia were independent negative predictors of 30-  
51  
52  
53  
54  
55  
56  
57  
58  
59  
60

1  
2  
3  
4 day mortality, interstitial lung disease, mechanical ventilation, septic shock, respiratory failure,  
5  
6 and persistent lymphocytopenia were independent negative predictors of 90-day mortality.

7  
8 **Conclusions:** Patients receiving long-term glucocorticoid therapy with pneumonia experience  
9  
10 higher rates of infection with opportunistic pathogens, significant morbidity, high mortality, and  
11  
12 specific risk factors. This information should be carefully considered when determining treatment  
13  
14 for this patient population.

15  
16  
17 **KEYWORDS:** Pneumonia; Immunocompromised; Glucocorticoids; Prognosis.  
18  
19  
20  
21  
22  
23  
24  
25  
26  
27  
28  
29  
30

## 31 **ARTICLE SUMMARY**

### 32 **Strengths and limitations of this study**

33  
34 The strengths of this study include the large sample size, multicenter (six hospitals in China), and  
35  
36 all patients were examined for sputum or BAL etiology.

37  
38 A limitation of this study is including it had a retrospective design.

39  
40 A limitation of this study is including not all patients with pneumonia underwent full pathogen  
41  
42 testing.

43  
44 A limitation of this study is that some pathogens were not identified until at least 48 hours after  
45  
46 admission, increasing the possibility of nosocomial infections.  
47  
48  
49

## 50 **INTRODUCTION**

51  
52 Long-term use of glucocorticoids at high doses may result in severe immunosuppression and serious  
53  
54 infections in patients.<sup>1</sup> Pulmonary infections occur most commonly, and remain one of the leading  
55  
56 causes of death in immunocompromised patients.<sup>1-4</sup> Infections caused by opportunistic pulmonary  
57  
58 pathogens, including *Cytomegalovirus* (CMV), *Pneumocystis*, and *Aspergillus*, have been reported  
59  
60 in immunocompromised patients receiving glucocorticoids.<sup>2-4</sup> High mortality have also been

1  
2  
3  
4 demonstrated in these immunocompromised patients. Agustí et al. reported a mortality of 45% for  
5 patients with pulmonary infections secondary to rheumatic immune disease treated with long-term  
6 glucocorticoids.<sup>1</sup> For those requiring mechanical ventilation, the mortality increased to 93%.  
7  
8 Unfortunately, there are limited studies of the prognostic risk factors for patients receiving long-  
9 term glucocorticoid therapy who develop pneumonia (LTGP). Without adequate research,  
10 pneumonia in these immunocompromised individuals may be mismanaged. Prevalence may be  
11 underestimated, with high rates of treatment failure. Alternatively, disease burden may be  
12 overestimated, leading to an excessive use of broad-spectrum antibiotics. Given the significant  
13 morbidity and mortality associated with glucocorticoid-induced immunosuppression, our study  
14 aims to identify the clinical characteristics, pathogenic etiologies, and prognostic risk factors of  
15 pneumonia in this population.  
16  
17  
18  
19  
20  
21  
22  
23  
24  
25  
26

## 27 **METHODS**

### 28 **Study design and participants**

29  
30 We retrospectively recruited patients with pneumonia hospitalized between 1<sup>st</sup> January 2013  
31 and 31<sup>st</sup> December 2017 at the departments of Pulmonary and Critical Care Medicine or  
32 Rheumatology at six tertiary or secondary academic hospitals in China. Diagnosis of pneumonia  
33 was based on the American Thoracic Society and Infectious Disease Society of America  
34 (ATS/IDSA) guidelines.<sup>5-6</sup> Pneumonia was defined as the presence of a new pulmonary infiltrate  
35 on chest radiograph during hospitalization and was combined with 1 or more of the following  
36 criteria: (1) new or increased cough with/without sputum production and/or purulent respiratory  
37 secretions; (2) fever or hypothermia; and (3) evidence of systemic inflammation (i.e., abnormal  
38 white blood cell count or increased levels of C-reactive or procalcitonin proteins). Patients with  
39 connective tissue disease, nephrotic syndrome or chronic glomerulonephritis, idiopathic interstitial  
40 pneumonia, bronchial asthma or chronic obstructive pulmonary disease, or other  
41 immunocompromised hosts were selected. All selected patients were required to meet the  
42 following inclusion criteria: (1) long-term glucocorticoid treatment with greater than 10 mg/day of  
43 prednisolone or equivalent for  $\geq 21$  days;<sup>7-9</sup> (2) diagnosed pneumonia at admission or during  
44 hospitalization; (3) at least 16-year-old. The exclusion criteria were as follows: (1) non-infectious  
45 pulmonary diseases including lung cancer, interstitial lung disease without infection, pulmonary  
46  
47  
48  
49  
50  
51  
52  
53  
54  
55  
56  
57  
58  
59  
60

1  
2  
3  
4 embolism, heart failure; (2) less than 16 years old; (3) Glucocorticoid treatment < 21 days, or less  
5  
6 than 10 mg of prednisolone or equivalent per day.

### 7 **Quality control of the study**

9 Key investigators, including clinicians, statisticians, microbiologists and radiologists, worked  
10  
11 together to draft the protocol and created a single formatted case report form (CRF) that was used  
12  
13 by all centres. Before study initiation, all investigators from the 6 centres received training on the  
14  
15 protocol, screening process, definition of under- lying diseases and formatted CRF. After data  
16  
17 were collected, the CRF was reviewed by a trained researcher to ensure its completeness and data  
18  
19 quality.

### 21 **Data collection**

23 The following data were collected from the medical records of patients during  
24  
25 hospitalization: (1) demographics; (2) clinical symptoms; (3) initial vital signs and lung  
26  
27 examination; (4) severity of the pneumonia [evaluated by intensive care unit (ICU) admission, use  
28  
29 of invasive or noninvasive mechanical ventilation, Pneumonia Severity Index (PSI) score, and/or  
30  
31 CURB-65 score];<sup>10-12</sup> (5) laboratory and microbiological data (blood, sputum, and/or  
32  
33 bronchoalveolar lavage samples; bacterial or fungal cultures; viral nucleic acid detection;  
34  
35 antibiotic susceptibility patterns); (6) treatment information including vasoactive, antimicrobial  
36  
37 drug, glucocorticoids and other immunosuppressants use; (7) survival status during 30 days and 90  
38  
39 days after admission. High-dose steroid use was defined as > 30mg/day prednisolone or  
40  
41 equivalent for greater than 21 days. Persistent lymphocytopenia was defined as peripheral blood  
42  
43 lymphocyte count lower than  $1 \times 10^9/L$  for greater than 7 days.

### 45 **Diagnostic procedures**

46 After identification of pulmonary infiltrates on chest radiograph, bronchoalveolar lavage  
47  
48 (BAL) or sputum samples were obtained by treating physicians. Microorganisms were identified  
49  
50 and tested for drug sensitivity. Bronchoalveolar examination was performed according to general  
51  
52 guidelines. Lidocaine spray was applied for local anesthesia, followed by the instillation of 60–  
53  
54 120 mL of sterile saline solution 2–4 times into the distal bronchial tree, either at the site of  
55  
56 radiographic abnormalities or in the middle lung lobes of patients with more diffuse radiographic  
57  
58 abnormalities. Bronchoalveolar lavage specimens were aliquoted and immediately transported to  
59  
60 the laboratories. The bacterial cultures were incubated at 35°C in 5–10% CO<sub>2</sub> for 48 hours. If



1  
2  
3  
4 *Nocardia* was suspected, the incubation time was prolonged. Fungal cultures were incubated at  
5  
6 27°C for 5 days under ambient conditions. The species were identified using Matrix-Assisted  
7  
8 Laser Desorption/Ionization Time-of-Flight Mass Spectrometry (Brooks Instrument, Germany) or  
9  
10 the BACTEC 9102 culture instrument (BD Biosciences, USA). Respiratory viral and atypical  
11  
12 pathogens were detected by polymerase chain reaction (PCR) (Shanghai Zhijiang Biological  
13  
14 Technology, China). The Platelia Aspergillus test was used for galactomannan detection in some  
15  
16 patients (Bio-Rad Laboratories, Marnes-la-Coquette, France).

### 17 **Pathogen-specific diagnostic information**

18  
19 We defined multidrug resistance (MDR) in specific organisms using the European Centre for  
20  
21 Disease Prevention and Control (ECDC) and Centers for Disease Control and Prevention (CDC)  
22  
23 criteria. We included the following species in this category: methicillin-resistant *Staphylococcus*  
24  
25 *aureus* (MRSA); vancomycin-resistant *Enterococcus* (VRE); *Enterobacteriaceae* producing  
26  
27 extended-spectrum beta-lactamases (ESBL). *Pseudomonas aeruginosa*, *Acinetobacter baumannii*  
28  
29 and other nonfermenting Gram-negative bacilli were considered to be MDR pathogens if not  
30  
31 susceptible to at least one agent in three or more antimicrobial categories.<sup>13 14</sup>

32  
33 For the diagnosis of pneumonia caused by atypical pathogens, the demonstration of  
34  
35 *Legionella* spp, *Mycoplasma pneumoniae*, or *Mycobacterium* DNA by PCR was considered  
36  
37 positive. Diagnosis of viral infections depended on nucleic acid positivity in BAL fluid or sputum  
38  
39 by PCR. For the diagnosis of pneumonia caused by *Aspergillus*, one or more of the following  
40  
41 criteria were required for a positive diagnosis: (1) histopathologic or direct microscopic evidence  
42  
43 of dichotomous septate hyphae with a positive culture for *Aspergillus* from tissue, (2) a positive  
44  
45 *Aspergillus* culture from BAL, (3) a galactomannan optical index on BAL of  $\geq 1$ , (4) a  
46  
47 galactomannan optical index on serum of  $\geq 0.5$ . (5) *Aspergillus* species identified by culture  
48  
49 characteristics and microscopic morphology.<sup>15 16</sup>

50  
51 Diagnosis of *Pneumocystis jirovecii* pneumonia (PCP) required the following criteria: (1)  
52  
53 high-resolution computed tomography (HRCT) imaging showing diffuse ground glass opacity  
54  
55 (GGO) with patchy distribution; (2) mycological criteria: microscopic examination revealing the  
56  
57 presence of *Pneumocystis* cystic or trophic forms in the respiratory samples or the respiratory  
58  
59 sample testing positive for *Pneumocystis* DNA using PCR.<sup>17</sup>

### 60 **Statistical analysis**

1  
2  
3  
4 The demographic and clinical characteristics and pathogen testing results were expressed as  
5 mean  $\pm$  standard deviation, median (interquartile range), or numbers (proportion). Group  
6 comparisons was conducted using the t-test or Wilcoxon rank-sum test for continuous variables  
7 with and without normal distributions, respectively. Comparisons between groups for categorical  
8 variables were made using the  $\chi^2$  test. Histogram chart was used to draw glucocorticoid  
9 application time (time chart). Distributions for the duration of glucocorticoid use among different  
10 respiratory pathogens were also compared with  $\chi^2$  test. Cox regression models were used to  
11 analyze the association of septic shock, interstitial lung disease, invasive and noninvasive  
12 mechanical ventilation,  $PO_2/FIO_2$ , and persistent lymphocytopenia with 30-day and 90-day  
13 mortality. In the cox logistic analysis, age, gender, noninvasive mechanical ventilation, invasive  
14 mechanical ventilation, respiratory failure, septic shock, ICU admission, high-dose steroids,  
15 persistent lymphocytopenia, combined with interstitial lung disease, severe pneumonia index  
16 score, CURB65 score, combined with PCP, combined with CMV, combined with non-CMV viral  
17 infection were adjusted.

18  
19  
20  
21  
22  
23  
24  
25  
26  
27  
28  
29  
30  
31 Statistical analyses were performed using SPSS, version 19.0 (SPSS, Inc., Chicago, Illinois).  
32 All tests were 2 sided, and  $P$  value  $< 0.05$  was considered to be statistically significant.

### 33 34 **Patient and Public Involvement**

35  
36 Not required.

### 37 38 **RESULTS**

39  
40 Between 1<sup>st</sup> January 2013 and 31<sup>st</sup> December 2017, 1397 patients with pneumonia had  
41 connective tissue disease, nephrotic syndrome, chronic nephritis, idiopathic pulmonary fibrosis, or  
42 other diseases with immunocompromised. After excluding patients not receiving long-term  
43 glucocorticoids (N=700) and patients without sputum or BALF for pathogen testing (N=83), 614  
44 were included in the final analysis (Figure 1). The positive rate of pathogen testing was 66.94%  
45 (411/614). Of patients with LTGP, 52.0% were diagnosed with connective tissue disease and  
46 13.8% were diagnosed with nephrotic syndrome or chronic glomerulonephritis. The average time  
47 of taking glucocorticoids was 4 (2,19) months. The proportions of adding other  
48 immunosuppressants and admission to ICU were 56.7% and 41.5%, respectively. For mechanical  
49 ventilation, 24.4% patients required invasive and 25.1% patients required noninvasive ventilation,  
50 respectively (Table 1). The 30-day and 90-day mortality after admission were 23.0% (141/614)  
51  
52  
53  
54  
55  
56  
57  
58  
59  
60

1  
2  
3  
4 and 26.7% (164/614). Patients died 90 days after admission received more intense treatment both  
5  
6 before admission and during hospitalization and have more complications than patients who were  
7  
8 survival. For example, the percentages of patients with ICU admission and septic shock were  
9  
10 higher in patients who died (Table 1).

11  
12 MDR bacteria and CMV were more commonly identified as causative pathogens for hospital-  
13  
14 acquired pneumonia (HAP) than community-acquired pneumonia (CAP) ( $P<0.05$ ) (Table 2).  
15  
16 Pneumonia pathogens were detected more commonly in the persistent lymphocytopenia group  
17  
18 than non-lymphocytopenia group ( $P<0.05$ ). The positive rates of PCP, influenza A virus, CMV  
19  
20 and MDR bacteria were lower among the non-lymphocytopenia group ( $P<0.05$ ). Patients with  
21  
22 high-dose steroid use developed pneumonias more frequently from infections of *Klebsiella*  
23  
24 *pneumoniae*, MDR bacteria, PCP, CMV, *Aspergillus*, and *Mycobacterium tuberculosis* than those  
25  
26 in the low-dose steroid group ( $P<0.05$ ). Pneumonia pathogens were more commonly detected in  
27  
28 the non-survivor group, and pneumonias were more commonly caused by PCP, mixed viral,  
29  
30 bacterial, fungal infections. *Aspergillus*; *Acinetobacter*, *Burkholderia*, MDR bacteria, and  
31  
32 influenza A virus were also more common among the non-survival group ( $P<0.05$ ). For non-CMV  
33  
34 viral pneumonias, respiratory syncytial virus (RSV,43 strains) was detected most frequently,  
35  
36 followed by influenza A virus (38 strains), human parainfluenza virus (HPIV,20 strains), influenza  
37  
38 B virus (14 strains), human rhinovirus (HRV,8 strains), herpes simplex virus type 1(HSV-1,4  
39  
40 strains).and adenovirus(ADV,3 strains) (Table2). Although patients with non-CMV viral  
41  
42 pneumonias had higher oxygenation indexes and lower respiratory failure rates, the 30-day and  
43  
44 90-day mortality was similar as patients with PCP and CMV( $P> 0.05$ ) (Table 3, Figure 2-3).

45  
46 Time analysis showed that 60.2% of the patients developed pneumonia within 6 months of  
47  
48 starting glucocorticoid therapy and 72.3% of patients developed pneumonia within 1 year (Figure  
49  
50 2). Of confirmed *Pneumocystis* pneumonia cases, 78.4% of patients developed disease within 6  
51  
52 months of starting glucocorticoid therapy and 87.2% developed pneumonia within 1 year. Of  
53  
54 confirmed CMV pneumonia cases, 69.7% of patients developed disease within 6 months of  
55  
56 starting glucocorticoid therapy and 81.4% of patients developed pneumonia within 1 year (Figure  
57  
58 3). For non-CMV virus, *Aspergillus*, and bacterial pneumonias, most patients developed illness  
59  
60 within 6 months of starting glucocorticoid therapy; however, the percentage was not as high as for  
patients with CMV and *Pneumocystis* pneumonias, and there was an additional incident peak 1

1  
2  
3  
4 year later (Figure 4).

5  
6 Cox regression analysis indicated that the following factors were independent predictors of 30-  
7 day mortality in LTGP: septic shock (OR = 6.306, 95% CI: 4.297-9.255;  $P < 0.001$ ); respiratory  
8 failure (OR = 12.583, 95% CI: 4.995-31.699;  $P = 0.001$ ); high-dose steroids (OR = 1.402, 95% CI:  
9 1.007-1.952;  $P = 0.046$ ); and persistent lymphocytopenia (OR = 1.606, 95% CI: 1.126-2.291;  $P =$   
10 0.009). Septic shock (OR = 5.942, 95% CI: 4.126-8.556;  $P < 0.001$ ), respiratory failure (OR =  
11 9.053, 95% CI: 3.639-22.524;  $P < 0.001$ ), interstitial lung disease (OR = 1.483, 95% CI: 1.085-  
12 2.027;  $P = 0.013$ ), mechanical ventilation (OR = 1.968, 95% CI: 1.215-3.188;  $P = 0.006$ ) and  
13 persistent lymphocytopenia (OR = 1.478, 95% CI: 1.068-2.045;  $P = 0.018$ ) were independent  
14 negative predictors of 90-day mortality (Table 4).  
15  
16  
17  
18  
19  
20  
21  
22  
23  
24

## 25 DISCUSSION

26  
27 This study was the first large-scale retrospective investigation of the etiology and prognostic  
28 risk factors of pneumonia in patients with long-term glucocorticoid use. The main findings of the  
29 present study are summarized as follows: (1) More than 60% of the patients developed pneumonia  
30 within 6 months of glucocorticoid therapy initiation, especially patients with PCP and CMV  
31 pneumonias. (2) Persistent lymphocytopenia was associated with significantly higher rates of  
32 infection by opportunistic pathogens, mixed pathogen types, and MDR bacteria. (3) Patients using  
33 high dose glucocorticoids were significantly more likely to develop opportunistic pneumonias  
34 than patients using low dose glucocorticoids. (4) The 30-day and 90-day mortality of non-CMV  
35 viral pneumonias were similar as that of PCP. (5) Septic shock, invasive or noninvasive  
36 mechanical ventilation, interstitial lung disease, low oxygenation index, and lymphocytopenia for  
37 more than 7 days were independent predictors of 90-day mortality in LTGP.  
38  
39  
40  
41  
42  
43  
44  
45  
46  
47

48 The use of glucocorticoids and other immunosuppressive agents are risk factors for the  
49 development of CMV, *Pneumocystis*, *Aspergillus*, and other opportunistic infections.<sup>18-23</sup> A  
50 review of 33 pneumonia patients with long-term glucocorticoid use showed that *Staphylococcus*  
51 *aureus* was the most common pathogen in pneumonia, with a wide range of other causative  
52 pathogens, including bacteria, fungi, viruses, *Pneumocystis*, *Mycobacterium*, etc.<sup>1</sup> Marta  
53 conducted an international multicenter study of immunocompromised patients, with chronic  
54 steroid users accounting for 45%.<sup>24</sup> That study showed that the main causative pathogens for  
55  
56  
57  
58  
59  
60

1  
2  
3 pneumonia were *Streptococcus pneumoniae*, *Pseudomonas aeruginosa*, *Klebsiella pneumoniae*,  
4 *Staphylococcus aureus*, influenza viruses, and PCP. In our study, the most common isolated  
5  
6 pathogen types were bacterial (252), CMV (193), non-CMV viruses (140), PCP (135), *Aspergillus*  
7  
8 or *Cryptococcus* (64), atypicals (11), and *Mycobacterium tuberculosis* (10). For bacterial  
9  
10 infections, the most commonly isolated pathogens were *Pseudomonas aeruginosa*, *Acinetobacter*  
11  
12 *baumannii*, *Klebsiella pneumoniae*, and *Staphylococcus aureus* because most patients had  
13  
14 received antibiotic therapy before admission. In some patients, the timing of the BAL or sputum  
15  
16 samples taking was more than 48 hours after admission, so bacteria such as *Acinetobacter*  
17  
18 *baumannii* were most likely acquired in the hospital.  
19  
20

21  
22 Studies have reported associations between mixed pulmonary infections and treatment with  
23  
24 glucocorticoids for nephrotic syndrome, lung transplantation, and other disorders requiring  
25  
26 immunosuppression.<sup>25-27</sup> In our study, the incidence of mixed infections was more than 50% and  
27  
28 the proportion of mixed infections caused by bacteria, fungi, and viruses was as high as 10%.  
29  
30 Glucocorticoid use may also be a risk factor for MDR bacterial infection. We demonstrated that  
31  
32 rates of MDR bacterial infection was significantly higher in the high dose steroid and the  
33  
34 persistent lymphocytopenia subgroups. When treating pneumonia in patients with long-term and  
35  
36 high dose steroids or with persistent lymphocytopenia, MDR pathogens must be considered when  
37  
38 selecting antimicrobial agents. In previous studies,<sup>30-31</sup> a clear association between low CD4<sup>+</sup>T  
39  
40 lymphocyte counts and PCP infection has been demonstrated. Low absolute lymphocyte count and  
41  
42 prolonged high dose steroid therapy have also been found to be predictors of PCP and CMV  
43  
44 infection.<sup>32-39</sup> Yang demonstrated that the average time until diagnosis of PCP was only 2.4  
45  
46 months after immunosuppressant initiation in glomerulonephritis patients.<sup>40</sup> Our results  
47  
48 demonstrate the importance of considering PCP infection in patients for at least 6 months after  
49  
50 glucocorticoid initiation, especially when receiving high doses. This study also indicates that high  
51  
52 dose glucocorticoid use is associated with *Mycobacterium tuberculosis* and *Aspergillus*  
53  
54 pneumonias. It has been shown that glucocorticoids have profound effects on the distributions and  
55  
56 functions of immune cells, including decreasing macrophage antifungal activity through inhibiting  
57  
58 reactive oxidant intermediates and directly stimulating the growth of *Aspergillus fumigatus*.<sup>41</sup>

59  
60 Respiratory viruses have also been recognized as a potential cause of pneumonia and death in  
immunocompromised individuals with hematopoietic stem cell transplants or hematologic

1  
2  
3 malignancies. Jacobs studied 32 patients with hematologic malignancies with HRV lower  
4 respiratory tract infections, overall 30-day mortality was 25%.<sup>42</sup> A higher mortality (27%) was  
5 observed by Dimpy in patients with lower respiratory tract infections caused by parainfluenza  
6 virus in hematopoietic cell transplant recipients and hematologic malignancy patients.<sup>43</sup> Chatzis  
7 showed that 21.3% of an immunocompromised adult cohort with RSV infection presented with  
8 pneumonia requiring ICU transfer, resulting in mortality of almost 20%.<sup>44</sup> Crotty conducted an  
9 observational cohort study of 284 patients with viral pneumonia, in which the majority (51.8%)  
10 were immunocompromised and the overall in-hospital mortality was high (23.2%).<sup>45</sup> In our study,  
11 invasive mechanical ventilation was required for 32.1% of patients with non-CMV viral  
12 pneumonia, and the 90-day mortality of these patients was 29.2%, PCP and CMV showed similar  
13 results ( $p > 0.05$ ). Therefore, it is extremely important to prevent infection with respiratory tract  
14 viruses in LTGP. If ground glass lesions were detected on CT imaging, PCP and viral infections  
15 should be considered, viral nucleic acid testing should be obtained, and antiviral treatment should  
16 be started as early as possible.

17  
18 Mortality from pulmonary infections in patients receiving long-term glucocorticoid therapy  
19 can be as high as 45%,<sup>1</sup> with a similar rate in patients with other causes of immunosuppression.<sup>21</sup>  
20 Respiratory failure and the need for mechanical ventilation has been shown to be the strongest  
21 predictor of mortality in immunocompromised patients with or without pneumonia.<sup>46 47</sup>  
22 Lymphopenia is also significantly associated with increased mortality in non-HIV-infected  
23 patients with PCP or viral pneumonias.<sup>32 48</sup> Vial-Dupuy indicated high-dose steroids during ICU  
24 stay (OR=0.19; [95% CI, 0.04-0.99]) were independent determinants of in-hospital mortality with  
25 interstitial lung disease admitted to the intensive care unit<sup>49</sup>. Kotani's study indicated underlying  
26 disease of interstitial lung disease was a risk factor associated with the mortality of *Pneumocystis*  
27 *jirovecii* pneumonia (PCP) who required mechanical ventilation (MV).<sup>50</sup> Our research pointed out  
28 that patients with high-dose glucocorticoid, persistent lymphocytopenia, and interstitial lung  
29 disease should pay attention to the poor prognosis.

30  
31 This study had some limitations. First, it had a retrospective design. Second, not all patients  
32 with pneumonia underwent full pathogen testing, so pathogen identification and diagnosis may be  
33 incomplete. Third, some pathogens were not identified until at least 48 hours after admission,  
34 increasing the possibility of nosocomial infections. Despite these limitations, our study results are

1  
2  
3  
4 consistent with the existing literature and provide more detailed insights into the clinical  
5 characteristics, pathogenic etiologies, and prognostic factors that should be carefully considered  
6 when managing patients on long-term glucocorticoid therapy.  
7  
8

## 9 CONCLUSIONS

10  
11 Patients receiving long-term glucocorticoid therapy with pneumonia experience higher rates  
12 of infection with opportunistic pathogens, significant morbidity, and high mortality, especially  
13 with specific risk factors. This information should be carefully considered when determining  
14 treatment strategies for this patient population.  
15  
16  
17

18  
19 **Funding:** This work was supported by the Ministry of Science and Technology Support Program  
20 (Grant: 2015BAI12B11) and the Beijing Science and Technology Commission Key Project  
21 (Grant: D151100002115004)  
22  
23

24  
25 **Contributors:** Study design: LL, BC. Data collection: LL, LS, GS, LS, LZ, CW, YR, JW,  
26 JP, JL. Statistical analysis: LL, SH.H. Writing: LL, BC, SH.H. All authors take full responsibility  
27 for the study design, data analysis and interpretation, and preparation of the manuscript. All  
28 authors approved the final draft manuscript.  
29  
30  
31

32  
33 **Competing interests** None declared.

34  
35 **Ethics approval** The Ethics Committee of China-Japan Friendship Hospital (no.2015-86)

36  
37 **Patient consent** Not required.

38  
39 **Provenance and peer review** Not commissioned; externally peer reviewed.

40  
41 **Data sharing statement** No additional data are available.

## 42 REFERENCES:

- 43  
44 1. Agustí C, Rañó A, Filella X, et al. Pulmonary infiltrates in patients receiving long-term glucocorticoid  
45 Treatment-Etiology, prognostic factors, and associated inflammatory response. *Chest* 2003; 123(2): 488-498.  
46  
47 2. Ajmal S, Mahmood M, Saleh O A, et al. Invasive fungal infections associated with prior respiratory viral  
48 infections in immunocompromised hosts. *Infection* 2018;46(4):555-558.  
49  
50 3. Fillâtre P, Revest M, Belaz S, et al. Pneumocystosis in non-HIV-infected immunocompromised patients. *Rev*  
51 *Med Interne* 2016;37(5):327-336.  
52  
53 4. Kofteridis DP, Aalachis A, Velegraki M, et al. Predisposing factors, clinical characteristics and outcome of  
54 Pneumocystis jirovecii pneumonia in HIV-negative patients. *J Infect Chemother* 2014; 20(7):412-416.  
55  
56 5. American Thoracic Society, Infectious Diseases Society of America. Guidelines for the management of adults  
57 with hospital-acquired, ventilator-associated, and healthcare-associated pneumonia. *Am J Respir Crit Care Med*  
58 2015;171(40):388-416.  
59  
60 6. Sousa D, Justo I, Domínguez A, et al. Community-acquired pneumonia in immunocompromised older patients:  
incidence, causative organisms and outcome. *Clin Microbiol Infect* 2013;19(2):187-192.

- 1
- 2
- 3
- 4 7. Jouneau S, Poineuf JS, Minjolle S, et al. Which patients should be tested for viruses on bronchoalveolar lavage
- 5 fluid? *Eur J Clin Microbiol Infect Dis* 2013;32(5):671-677.
- 6
- 7 8. Denise Rossato Silva et al. Clinical characteristics and evolution of non-HIV-infected immunocompromised
- 8 patients with an in-hospital diagnosis of tuberculosis. *J Bras Pneumol* 2010;36(4):475-484.
- 9
- 10 9. Diamantis P, Kofteridis et al. Predisposing factors, clinical characteristics and outcome of *Pneumocystis*
- 11 *jirovecii* pneumonia in HIV-negative patients. *J Infect Chemother* 2014; 20:412-416.
- 12
- 13 10. Marti C, Garin N, Grosгурin O, et al. Prediction of severe community-acquired pneumonia: a systematic
- 14 review and meta-analysis. *Crit Care* 2012; 16(4): R141.
- 15
- 16 11. Kwok C S, Loke Y K, Woo K, et al. Risk prediction models for mortality in community-acquired pneumonia:
- 17 a systematic review. *Biomed Res Int* 2013;2013(10): 504136. DOI: 10.1155/2013/504136.
- 18
- 19 12. Furtado G H, Wiskirchen D E, Kuti J L, et al. Performance of the PIRO score for predicting mortality in
- 20 patients with ventilator-associated pneumonia. *Anaesth Intensive Care* 2012; 40(2):285-291.
- 21
- 22 13. Aliberti S, Cilloniz C, Chalmers J D, et al. Multidrug-resistant pathogens in hospitalized patients coming from
- 23 the community with pneumonia: a European perspective. *Thorax* 2013;68(11):997-999.
- 24
- 25 14. Magiorakos A P, Srinivasan A, Carey R B, et al. Multidrug-resistant, extensively drug-resistant and pan drug-
- 26 resistant bacteria: an international expert proposal for interim standard definitions for acquired resistance. *Clin*
- 27 *Microbiol Infect* 2012; 18(3):268-281.
- 28
- 29 15. Schauwvlieghe A F A D, Rijnders B J A, Nele P, et al. Invasive aspergillosis in patients admitted to the
- 30 intensive care unit with severe influenza: a retrospective cohort study. *Lancet Respir Med* 2018;6(10):782-792.
- 31
- 32 16. Patterson TF, Thompson GR 3rd, Denning DW. Practice Guidelines for the Diagnosis and Management
- 33 of Aspergillosis: 2016 Update by the Infectious Diseases Society of America. *Clin Infect Dis* 2016; 63(4): e1-e60.
- 34
- 35 17. Guo F, Chen Y, Yang S L, et al. *Pneumocystis* Pneumonia in HIV-Infected and Immunocompromised Non-
- 36 HIV Infected Patients: A Retrospective Study of Two Centers in China. *Plos One* 2014; 9(7): e101943.
- 37
- 38 18. Kim T, Park SY, Lee HJ, et al. Assessment of cytomegalovirus and cell-mediated immunity for predicting
- 39 outcomes in non-HIV-infected patients with *Pneumocystis jirovecii* pneumonia. *Medicine (Baltimore)* 2017;
- 40 96(30): e7243.
- 41
- 42 19. Brownback KR, Pitts LR, Simpson SQ. Utility of galactomannan antigen detection in bronchoalveolar lavage
- 43 fluid in immunocompromised patients. *Mycoses* 2013; 56(5):552-558.
- 44
- 45 20. Ajmal S, Mahmood M, Saleh O A, et al. Invasive fungal infections associated with prior respiratory viral
- 46 infections in immunocompromised hosts. *Infection* 2018;46(4):55-558.
- 47
- 48 21. Rañó A, Agustí C, Jimenez P, et al. Pulmonary infiltrates in non-HIV immunocompromised patients: a
- 49 diagnostic approach using non-invasive and bronchoscopic procedures. *Thorax* 2001; 56(5):379-387.
- 50
- 51 22. Jolis R, Castella J, Puzo C, et al. Diagnostic value of protected BAL in diagnosing pulmonary infections in
- 52 immunocompromised patients. *Chest* 1996;109(3):601-607.
- 53
- 54 23. Eyüboğlu FÖ, Küpeli E, Bozbaş SS, et al. Evaluation of pulmonary infections in solid organ transplant
- 55 patients: 12 years of experience. *Transplant Proc* 2013; 45(10):3458-3461.
- 56
- 57 24. Di Pasquale MF, Sotgiu G, Gramegna A. Prevalence and Etiology of Community-
- 58 acquired Pneumonia in Immunocompromised Patients. *Clin Infect Dis* 2019 Apr 24;68(9):1482-1493.
- 59
- 60 25. Popova V V, Shilov E M, Kornev B M, et al. Development of mixed infection in patient with nephrotic
- syndrome on immunosuppressive therapy. *Ter Arkh* 1998;70(6):56-7.
26. Qureshi S, Pandey A, Sirohi T R, et al. Mixed pulmonary infection in an immunocompromised patient: a rare
- case report. *Indian J Med Microbiol* 2014;32(1):79-81.
27. Hamadani M, Jr B D, Blum W, et al. Pulmonary *Nocardia* and *Aspergillus* co-infection in a patient with
- chronic graft-versus-host disease. *Transpl Infect Dis* 2010, 10(1):24-26.



- 1  
2  
3  
4 28. Montero M, Sala M, Riu M, et al. Risk factors for multidrug-resistant *Pseudomonas aeruginosa* acquisition. Impact of antibiotic use in a double case-control study. *Eur J Clin Microbiol Infect Dis* 2010; 29(3) :335-339.
- 5  
6 29. Parker CM, Kutsogiannis J, Muscedere J, et al. Ventilator-associated pneumonia caused by multidrug-resistant organisms or *Pseudomonas aeruginosa*: prevalence, incidence, risk factors, and outcomes. *J Crit Care* 2008; 23(1):  
7 18-26.
- 8  
9 30. Rouyer M, Stoclin A, Blanc FX. Pneumocystis pneumonia in HIV-negative adults. *Rev Mal Respir*  
10 2015;32(10):985-90.
- 11  
12 31. Williams KM, Ahn KW, Chen M, et al. The incidence, mortality and timing of *Pneumocystis jirovecii*  
13 pneumonia after hematopoietic cell transplantation: a CIBMTR analysis. *Bone Marrow Transplant*  
14 2016;51(4):573-80.
- 15  
16 32. Chia-Jung Liu, Tai-Fen Lee, Sheng-Yuan Ruan, et al. Clinical characteristics, treatment outcomes, and  
17 prognostic factors of *Pneumocystis pneumonia* in non-HIV-infected patients. *Infect Drug Resist* 2019; 12: 1457–  
18 1467.
- 19  
20 33. Nierenberg NE, Poutsika DD, Chow JK. Pretransplant lymphopenia is a novel prognostic factor in  
21 cytomegalovirus and non-cytomegalovirus invasive infections after liver transplantation. *Liver*  
22 *Transpl* 2014;20(12):1497-507.
- 23  
24 34. Werbel WA, Ison MG, Angarone MP, et al. Lymphopenia is associated with late onset *Pneumocystis jirovecii*  
25 pneumonia in solid organ transplantation. *Transpl Infect Dis* 2018;20(3): e12876.
- 26  
27 35. Tadros S, Teichtahl AJ, Ciciriello S, et al. *Pneumocystis jirovecii* pneumonia in systemic autoimmune rheumatic  
28 disease: A case-control study. *Semin Arthritis Rheum* 2017;46(6):804-809.
- 29  
30 36. Lee EH, Kim EY, Lee SH. Risk factors and clinical characteristics of *Pneumocystis jirovecii* pneumonia in lung  
31 cancer. *Sci Rep* 2019 ;9(1):2094.
- 32  
33 37. Lemiale V, Debrumetz A, Delannoy A, Alberti C, Azoulay E. Adjunctive steroid in HIV-negative patients with  
34 severe *Pneumocystis pneumonia*. *Respir Res* 2013; 14:87.
- 35  
36 38. Tong J, Sun Z, Liu H. Risk factors of CMV infection in patients after umbilical cord blood transplantation: a  
37 multicenter study in China. *Chin J Cancer Res* 2013;25(6):695-703.
- 38  
39 39. Park JW, Curtis JR, Kim MJ, et al. *Pneumocystis pneumonia* in patients with rheumatic diseases receiving  
40 prolonged, non-high-dose steroids—clinical implication of primary prophylaxis using trimethoprim-  
41 sulfamethoxazole. *Arthritis Res Ther* 2019;21(1):207.
- 42  
43 40. Yang CY, Yang AH, Yang WC, et al. Risk factors for *Pneumocystis jirovecii* pneumonia in glomerulonephritis  
44 patients receiving immunosuppressants. *Intern Med* 2012;51(20):2869-75.
- 45  
46 41. Philippe, B, Ibrahim-Granet, O, Prevost, M.C. et al. Killing of *Aspergillus fumigatus* by alveolar macrophages  
47 is mediated by reactive oxidant intermediates. *Infect Immun* 2003;71(6):3034-42.
- 48  
49 42. Jacobs SE, Lamson DM, Soave R, et al. Clinical and molecular epidemiology of human rhinovirus infections in  
50 patients with hematologic malignancy. *J Clin Virol* 2015; 71:51-8.
- 51  
52 43. Shah DP, Shah PK, Azzi JM, et al. Parainfluenza virus infections in hematopoietic cell  
53 transplant recipients and hematologic malignancy patients: A systematic review. *Cancer Lett* 2016;370(2):358-64.
- 54  
55 44. Chatzis O, Darbre S, Pasquier J. Burden of severe RSV disease among immunocompromised children and  
56 adults: a 10 year retrospective study. *BMC Infect Dis* 2018;18(1):111.
- 57  
58 45. Crotty MP, Meyers S, Hampton N, et al. Epidemiology, Co-Infections, and Outcomes of Viral  
59 Pneumonia in Adults: An Observational Cohort Study. *Medicine (Baltimore)* 2015;94(50): e2332.
- 60  
61 46. Rañó A, Agustí C, Benito N, et al. Prognostic factors of non-HIV immunocompromised patients with  
62 pulmonary infiltrates. *Chest* 2002,122(1):253-261.
- 63  
64 47. Azoulay E, Pickkers P, Soares M. Acute hypoxemic respiratory failure in immunocompromised patients:

1  
2  
3 the Efrain multinational prospective cohort study. *Intensive Care Med* 2017;43(12):1808-1819.  
4  
5 48. Shi SJ, Li H, Liu M ,et al. (2017). Mortality prediction to hospitalized patients with influenza pneumonia: PO2  
6 /FiO2 combined lymphocyte count is the answer. *Clin Respir J* 2017;11(3):352-360.  
7  
8 49. Vial-Dupuy A, Sanchez O, Douvry B,et al. Outcome of patients with interstitial lung disease admitted to the  
9 intensive care unit. *Sarcoidosis Vasc Diffuse Lung Dis* 2013 ;30(2):134-42.  
10  
11 50. Kotani T, Katayama S, Miyazaki Y. Risk Factors for the Mortality of Pneumocystis jirovecii Pneumonia in  
12 Non-HIV Patients Who Required Mechanical Ventilation: A Retrospective Case Series Study. *Biomed Res Int*  
13 2017; 2017:7452604.  
14

15 **Figure legend/caption:**

16  
17  
18  
19 Figure1: Study flowchart

20  
21 Figure2: 30-day mortality of pneumocystis infection group and viral infection group

22  
23 Figure3: 90-day mortality of pneumocystis infection group and viral infection group

24  
25 Figure4: Duration of glucocorticoid use among long-term glucocorticoid users with  
26 pneumonia

27  
28  
29 60.2% of the patients developed pneumonia within 6 months of starting glucocorticoid  
30 therapy and 72.3% of patients developed pneumonia within 1 year.

31  
32  
33 78.4% of PCP patients developed disease within 6 months of starting glucocorticoid therapy  
34 and 87.2% developed pneumonia within 1 year.

35  
36  
37 Of confirmed CMV pneumonia cases, 69.7% of patients developed disease within 6 months  
38 of starting glucocorticoid therapy and 81.4% of patients developed pneumonia within 1 year.  
39  
40  
41  
42  
43  
44  
45  
46  
47  
48  
49  
50  
51  
52  
53  
54  
55  
56  
57  
58  
59  
60

**Table 1** Clinical characteristics of long-term glucocorticoid users with pneumonia between survivors and those who died in 90-days after admission

| Variables                                                    | Total, N=614       | Survivors, N=450    | Died, N=164         | P-Value |
|--------------------------------------------------------------|--------------------|---------------------|---------------------|---------|
| Sex, female, n (%)                                           | 311(50.7)          | 236(52.4)           | 75(45.7)            | 0.141   |
| Age, median (IQR)                                            | 60(58,103)         | 59.0(47.0,68.0)     | 62.0(52.0,70.0)     | 0.008   |
| Symptoms and signs, n (%)                                    |                    |                     |                     |         |
| Fever                                                        | 471(76.7)          | 322(71.6)           | 149(90.9)           | <0.001  |
| Cough                                                        | 526(85.7)          | 377(83.8)           | 149(90.9)           | 0.027   |
| Expectoration                                                | 478(77.9)          | 348(77.3)           | 130(79.3)           | 0.523   |
| Dyspnea                                                      | 366(59.6)          | 232(51.6)           | 134(81.7)           | <0.001  |
| Disturbance of consciousness                                 | 38(6.2)            | 18(4.0)             | 20(12.2)            | <0.001  |
| Laboratory examination                                       |                    |                     |                     |         |
| White blood cell, $\times 10^9/L$ (IQR)                      | 7.93(5.78,11.60)   | 7.64 (5.71,10.98)   | 9.27 (6.17,13.00)   | 0.001   |
| Neutrophils, $\times 10^9/L$ (IQR)                           | 6.5(4.29,10.10)    | 6.16(4.02,9.03)     | 8.11 (5.37,11.40)   | <0.001  |
| Lymphocyte, $\times 10^9/L$ (IQR)                            | 0.84(0.50,1.40)    | 0.96 (0.60,1.49)    | 0.60 (0.36,1.01)    | <0.001  |
| Persistent lymphocytopenia                                   | 262(42.7)          | 156(34.7)           | 106(64.6)           | <0.001  |
| Mean hemoglobin $\pm$ SD, g/L                                | 111.8 $\pm$ 23.9   | 113.1 $\pm$ 24.2    | 108.4 $\pm$ 22.8    | 0.034   |
| Mean albumin $\pm$ SD, g/L                                   | 32.4 $\pm$ 6.4     | 33.3 $\pm$ 6.2      | 29.9 $\pm$ 6.1      | <0.001  |
| Lactate dehydrogenase, U/L                                   | 329.5(224.3,506.0) | 291.0 (204.0,417.0) | 488.0 (338.0,622.0) | <0.001  |
| Blood urea nitrogen, mmol/L                                  | 6.23(4.58,9.33)    | 5.81 (4.30,8.14)    | 8.11 (5.81,12.71)   | <0.001  |
| Serum creatinine, mmol/L                                     | 63.0(50.0,89.9)    | 62.7 (49.9,83.9)    | 68.3 (50.0,107.0)   | 0.077   |
| Procalcitonin, ng/ml                                         | 0.28(0.13,0.83)    | 0.27 (0.13,0.67)    | 0.40(0.12,1.64)     | 0.039   |
| Oxygenation index                                            | 231.0(126.3,342.9) | 280.7(187.7,376.1)  | 126.3(80.0,198.4)   | <0.001  |
| Severe pneumonia index score                                 | 77.0(58.0,103.0)   | 72.0(55.0,92.0)     | 96.5(75.0,122.8)    | <0.001  |
| CURB65 score                                                 | 1(0,2)             | 1.0(0,1.0)          | 1.5(1.0,2.0)        | <0.001  |
| Underlying immune defect, n (%)                              |                    |                     |                     |         |
| Diabetes mellitus                                            | 146(23.8)          | 99(22.0)            | 47(28.7)            | 0.086   |
| Tumor                                                        | 36(5.9)            | 23(5.1)             | 13(7.9)             | 0.189   |
| Connective tissue disease                                    | 319(52.0)          | 230(51.1)           | 89(54.3)            | 0.488   |
| Interstitial lung disease                                    | 257(41.9)          | 172(38.2)           | 85(51.8)            | 0.009   |
| Nephrotic syndrome or chronic glomerulonephritis             | 85(13.8)           | 61(13.6)            | 24(14.6)            | 0.732   |
| Idiopathic interstitial pneumonia                            | 64(10.4)           | 47(10.4)            | 17(10.4)            | 0.978   |
| Bronchial asthma or chronic obstructive pulmonary disease    | 28(4.6)            | 23(5.1)             | 5(3.0)              | 0.278   |
| Lymphoma                                                     | 16(2.6)            | 12(2.7)             | 4(2.4)              | 0.876   |
| After bone marrow or hematopoietic stem cell transplantation | 7(1.1)             | 5(1.1)              | 2(1.2)              | 0.911   |
| Postoperative solid organ transplantation                    | 30(4.9)            | 23(5.1)             | 7(4.3)              | 0.668   |
| Radiation pneumonitis                                        | 7(1.1)             | 5(1.1)              | 2(1.2)              | 0.911   |
| Other immunocompromised hosts                                | 58(9.4)            | 44(9.8)             | 14(8.5)             | 0.642   |
| Bronchoalveolar lavage, n (%)                                | 366(59.6)          | 248(55.1)           | 118(72.0)           | <0.001  |
| Treatment, before admission, n (%)                           |                    |                     |                     |         |
| High-dose steroids(>1mg/kg/day)                              | 216(35.2)          | 134(29.8)           | 82(50.0)            | <0.001  |

| Variables                                 | Total, N=614 | Survivors, N=450 | Died, N=164   | P-Value |
|-------------------------------------------|--------------|------------------|---------------|---------|
| Time of steroids use, median (IQR), month | 4(2,19)      | 3.0(1.0,8.5)     | 5.0(2.0,24.0) | <0.001  |
| Receiving other immunosuppressive therapy | 348(56.7)    | 247(14.0)        | 101(61.6)     | 0.138   |
| Antibiotics <sup>†</sup>                  | 411(66.9)    | 287(63.8)        | 124(75.6)     | 0.006   |
| Antiviral drugs                           | 95(15.5)     | 54(12.0)         | 41(25.0)      | <0.001  |
| Treatment, during hospitalization, n (%)  |              |                  |               |         |
| Anti - Pseudomonas aeruginosa drugs       | 461(75.1)    | 306(68.0)        | 155(94.5)     | <0.001  |
| Voriconazole or caspofungin               | 233(37.9)    | 129(28.7)        | 104(63.4)     | <0.001  |
| Ganciclovir                               | 276(45.0)    | 172(38.2)        | 104(63.4)     | <0.001  |
| Trimethoprim                              | 270(44.0)    | 172(38.2)        | 98(59.8)      | <0.001  |
| Complications, n (%)                      |              |                  |               |         |
| Noninvasive ventilation                   | 154(25.1)    | 60(13.3)         | 94(57.3)      | <0.001  |
| Invasive mechanical ventilation           | 150(24.4)    | 47(10.4)         | 103(79.3)     | <0.001  |
| Mechanical ventilation                    | 225(36.6)    | 87(19.3)         | 138(84.1)     | <0.001  |
| Respiratory failure during admission      | 275(44.8)    | 131(29.1)        | 144(87.8)     | <0.001  |
| ICU admission                             | 255(41.5)    | 119(26.4)        | 136(82.9)     | <0.001  |
| Septic shock during hospitalization       | 132(21.5)    | 18(4.0)          | 114(69.5)     | <0.001  |
| CAP                                       | 542(88.3)    | 408(90.7)        | 134(81.7)     | <0.001  |
| Extracorporeal membrane oxygenation       | 26(4.2)      | 11(2.4)          | 15(9.1)       | <0.001  |

\*Connective tissue disorders: rheumatoid arthritis, systemic lupus erythematosus, dermatomyositis, polymyositis, systemic sclerosis, Sjogren's syndrome, etc. @ Immunosuppressive drugs: glucocorticoid, tacrolimus, sirolimus, cyclosporine, methotrexate, etc.

\*Other immunocompromised hosts: eczema, myelitis, autoimmune encephalitis, idiopathic thrombocytopenic purpura, etc.

† other immunosuppressants: methotrexate, cyclophosphamide, tacrolimus, azathioprine, etc.

**Table 2** The pathogen testing result of long-term glucocorticoid users with pneumonia according to different subgroup

| Variables, n (%)               | CAP<br>(N=542) | HAP<br>(N=72) | <i>P</i> -<br>Value | Patients<br>discharged alive,<br>N=450 | Patients died<br>during<br>hospitalization,<br>N=164 | <i>P</i> -<br>Value | Persistent<br>lymphocytope<br>nia group,<br>N=262 | Non-lymphocyto<br>penia group,<br>N=352 | <i>P</i> -<br>Value | Patients use<br>high-dose<br>steroids, N=216 | Patients use<br>low-dose<br>steroids, N=398 | <i>P</i> -<br>Value |
|--------------------------------|----------------|---------------|---------------------|----------------------------------------|------------------------------------------------------|---------------------|---------------------------------------------------|-----------------------------------------|---------------------|----------------------------------------------|---------------------------------------------|---------------------|
| Total pathogenic positive rate | 361(66.6)      | 53(73.6)      | 0.222               | 289(64.2)                              | 125(76.2)                                            | 0.007               | 188(71.8)                                         | 226(64.2)                               | 0.048               | 177(81.9)                                    | 237(59.5)                                   | <0.001              |
| One bacterium                  | 36(6.6)        | 6(8.3)        | 0.593               | 36(8.0)                                | 6(3.7)                                               | 0.059               | 16(6.1)                                           | 26(7.4)                                 | 0.534               | 12(5.6)                                      | 30(7.5)                                     | 0.353               |
| Two or more bacteria           | 16(3.0)        | 4(5.6)        | 0.242               | 11(2.4)                                | 9(5.5)                                               | 0.060               | 7(2.7)                                            | 13(3.7)                                 | 0.481               | 12(5.6)                                      | 8(2.0)                                      | 0.018               |
| One virus                      | 87(16.1)       | 9(12.5)       | 0.436               | 75(16.7)                               | 21(12.8)                                             | 0.244               | 35(13.4)                                          | 61(17.3)                                | 0.180               | 32(14.8)                                     | 64(16.1)                                    | 0.680               |
| Two or more viruses            | 16(3.0)        | 0(0)          | 0.140               | 10(2.2)                                | 6(3.7)                                               | 0.323               | 8(3.1)                                            | 8(2.3)                                  | 0.548               | 3(1.4)                                       | 13(3.3)                                     | 0.163               |
| Pneumocystis                   | 32(5.9)        | 3(4.2)        | 0.550               | 25(5.6)                                | 10(6.1)                                              | 0.798               | 14(5.3)                                           | 21(6.0)                                 | 0.742               | 19(8.8)                                      | 16(4.0)                                     | 0.015               |

|    |                                                 |           |          |       |           |          |        |          |          |       |          |          |       |
|----|-------------------------------------------------|-----------|----------|-------|-----------|----------|--------|----------|----------|-------|----------|----------|-------|
| 1  |                                                 |           |          |       |           |          |        |          |          |       |          |          |       |
| 2  |                                                 |           |          |       |           |          |        |          |          |       |          |          |       |
| 3  |                                                 |           |          |       |           |          |        |          |          |       |          |          |       |
| 4  |                                                 |           |          |       |           |          |        |          |          |       |          |          |       |
| 5  | Aspergillus                                     | 9(1.7)    | 0(0)     | 0.271 | 6(1.3)    | 3(1.8)   | 0.651  | 4(2.5)   | 5(1.4)   | 0.914 | 6(2.8)   | 3(0.8)   | 0.046 |
| 6  | Atypical pathogen                               | 7(1.3)    | 0(0)     | 0.332 | 7(1.6)    | 0(0)     | 0.108  | 1(0.4)   | 6(1.7)   | 0.127 | 2(0.9)   | 5(1.3)   | 0.713 |
| 7  | Virus and bacteria                              | 34(6.3)   | 6(8.3)   | 0.506 | 23(5.1)   | 17(10.4) | 0.020  | 20(7.6)  | 20(5.7)  | 0.332 | 16(7.4)  | 24(6.0)  | 0.509 |
| 8  | Virus and aspergillus                           | 12(2.2)   | 2(2.8)   | 0.763 | 9(2.0)    | 5(3.0)   | 0.441  | 6(2.3)   | 8(2.3)   | 0.989 | 7(3.2)   | 7(1.8)   | 0.240 |
| 9  | Virus, bacteria and fungi                       | 49(9.0)   | 10(13.9) | 0.190 | 34(7.6)   | 25(15.2) | 0.004  | 33(12.6) | 26(7.4)  | 0.030 | 26(12.0) | 33(8.3)  | 0.133 |
| 10 | Bacteria and pneumocystis                       | 8(1.5)    | 2(2.8)   | 0.412 | 4(0.9)    | 6(3.7)   | 0.016  | 7(2.7)   | 3(0.9)   | 0.078 | 6(2.8)   | 4(1.0)   | 0.097 |
| 11 | Aspergillus and pneumocystis                    | 3(0.6)    | 0(0)     | 0.527 | 3(0.7)    | 0(0)     | 0.295  | 2(0.8)   | 1(0.3)   | 0.400 | 1(0.5)   | 2(0.5)   | 0.946 |
| 12 | Bacteria and Aspergillus                        | 4(0.7)    | 1(1.4)   | 0.564 | 4(0.9)    | 1(0.6)   | 0.733  | 2(0.8)   | 3(0.9)   | 0.903 | 2(0.9)   | 3(0.8)   | 0.821 |
| 13 | Pneumocystis and virus or atypical pathogen     | 39(7.2)   | 9(12.5)  | 0.115 | 34(7.6)   | 14(8.5)  | 0.689  | 27(10.3) | 21(6.0)  | 0.048 | 26(12.0) | 22(5.5)  | 0.004 |
| 14 | Mycobacterium tuberculosis and another pathogen | 9(1.7)    | 1(1.4)   | 0.864 | 8(1.8)    | 2(1.2)   | 0.629  | 6(2.3)   | 4(1.1)   | 0.264 | 7(3.2)   | 3(0.8)   | 0.020 |
| 15 | Pathogenic types in different groups (Total)    | 674       | 109      | -     | 512       | 271      | -      | 378      | 405      | -     | 345      | 438      |       |
| 16 | Pathogens covered by CAP therapy                | 130(24.0) | 18(25.0) | 0.850 | 109(24.2) | 39(23.8) | 0.910  | 60(22.9) | 88(25.0) | 0.547 | 69(31.9) | 79(19.8) | 0.001 |
| 17 | <i>Streptococcus pneumoniae</i>                 | 4(0.7)    | 0(0)     | 0.465 | 4(0.9)    | 0(0)     | 0.226  | 1(0.4)   | 3(0.9)   | 0.473 | 0(0)     | 4(1.0)   | 0.139 |
| 18 | <i>Haemophilus influenzae</i>                   | 2(0.4)    | 0(0)     | 0.606 | 2(0.4)    | 0(0)     | 0.392  | 1(0.4)   | 1(0.3)   | 0.834 | 2(0.9)   | 0(0)     | 0.055 |
| 19 | <i>Staphylococcus aureus</i>                    | 13(2.4)   | 3(4.2)   | 0.376 | 9(2.0)    | 7(4.3)   | 0.119  | 7(2.7)   | 9(2.6)   | 0.930 | 9(4.2)   | 7(1.8)   | 0.073 |
| 20 | <i>Escherichia coli</i>                         | 12(2.2)   | 3(4.2)   | 0.313 | 12(2.7)   | 3(1.8)   | 0.552  | 4(1.5)   | 11(3.1)  | 0.205 | 6(2.8)   | 9(2.3)   | 0.692 |
| 21 | <i>Enterobacter aerogenes</i>                   | 2(0.4)    | 0(0)     | 0.606 | 1(0.2)    | 1(0.6)   | 0.456  | 1(0.4)   | 1(0.3)   | 0.834 | 0(0)     | 2(0.5)   | 0.297 |
| 22 | <i>Enterobacter cloacae</i>                     | 5(0.9)    | 2(2.8)   | 0.164 | 5(1.1)    | 2(1.2)   | 0.911  | 2(0.8)   | 5(1.4)   | 0.448 | 4(1.9)   | 3(0.8)   | 0.221 |
| 23 | <i>Klebsiella pneumoniae</i>                    | 35(6.5)   | 3(4.2)   | 0.448 | 26(5.8)   | 12(7.3)  | 0.484  | 18(4.8)  | 20(5.7)  | 0.546 | 21(9.7)  | 17(4.3)  | 0.007 |
| 24 | <i>Pseudomonas</i>                              | 43(7.9)   | 7(9.7)   | 0.602 | 37(8.2)   | 13(7.9)  | 0.906  | 20(6.9)  | 30(8.5)  | 0.690 | 22(10.2) | 28(7.0)  | 0.173 |
| 25 | <i>Proteus mirabilis</i>                        | 3(0.6)    | 0(0)     | 0.527 | 3(0.7)    | 0(0)     | 0.295  | 3(1.1)   | 0(0)     | 0.044 | 2(0.9)   | 1(0.3)   | 0.252 |
| 26 | <i>Mycoplasma pneumoniae</i>                    | 3(0.6)    | 0(0)     | 0.527 | 3(0.7)    | 0(0)     | 0.295  | 0(0)     | 3(0.9)   | 0.134 | 2(0.9)   | 1(0.3)   | 0.252 |
| 27 | <i>Legionella</i>                               | 8(1.5)    | 0(0)     | 0.299 | 7(1.6)    | 1(0.6)   | 0.361  | 3(1.1)   | 5(1.4)   | 0.766 | 1(0.5)   | 7(1.8)   | 0.176 |
| 28 | Pathogens not covered by CAP therapy            | 81(14.9)  | 22(30.6) | 0.001 | 50(11.1)  | 53(32.3) | <0.001 | 52(19.8) | 51(14.5) | 0.079 | 39(18.1) | 64(16.1) | 0.532 |
| 29 | <i>Acinetobacter</i>                            | 37(6.8)   | 13(18.1) | 0.001 | 24(5.3)   | 26(15.9) | <0.001 | 29(11.1) | 21(6.0)  | 0.022 | 15(6.9)  | 35(8.8)  | 0.340 |
| 30 |                                                 |           |          |       |           |          |        |          |          |       |          |          |       |
| 31 |                                                 |           |          |       |           |          |        |          |          |       |          |          |       |
| 32 |                                                 |           |          |       |           |          |        |          |          |       |          |          |       |
| 33 |                                                 |           |          |       |           |          |        |          |          |       |          |          |       |
| 34 |                                                 |           |          |       |           |          |        |          |          |       |          |          |       |
| 35 |                                                 |           |          |       |           |          |        |          |          |       |          |          |       |
| 36 |                                                 |           |          |       |           |          |        |          |          |       |          |          |       |
| 37 |                                                 |           |          |       |           |          |        |          |          |       |          |          |       |
| 38 |                                                 |           |          |       |           |          |        |          |          |       |          |          |       |
| 39 |                                                 |           |          |       |           |          |        |          |          |       |          |          |       |
| 40 |                                                 |           |          |       |           |          |        |          |          |       |          |          |       |
| 41 |                                                 |           |          |       |           |          |        |          |          |       |          |          |       |
| 42 |                                                 |           |          |       |           |          |        |          |          |       |          |          |       |
| 43 |                                                 |           |          |       |           |          |        |          |          |       |          |          |       |
| 44 |                                                 |           |          |       |           |          |        |          |          |       |          |          |       |
| 45 |                                                 |           |          |       |           |          |        |          |          |       |          |          |       |
| 46 |                                                 |           |          |       |           |          |        |          |          |       |          |          |       |

|    |                                         |           |          |       |           |           |        |           |           |        |           |           |        |
|----|-----------------------------------------|-----------|----------|-------|-----------|-----------|--------|-----------|-----------|--------|-----------|-----------|--------|
| 1  |                                         |           |          |       |           |           |        |           |           |        |           |           |        |
| 2  |                                         |           |          |       |           |           |        |           |           |        |           |           |        |
| 3  |                                         |           |          |       |           |           |        |           |           |        |           |           |        |
| 4  |                                         |           |          |       |           |           |        |           |           |        |           |           |        |
| 5  | <i>Burkholderia</i>                     | 16(3.0)   | 2(2.8)   | 0.934 | 4(0.9)    | 14(8.5)   | <0.001 | 7(2.7)    | 11(3.1)   | 0.742  | 9(4.2)    | 9(2.3)    | 0.181  |
| 6  | <i>Enterococcus</i>                     | 7(1.3)    | 2(2.8)   | 0.324 | 4(0.9)    | 5(3.0)    | 0.049  | 2(0.8)    | 7(2.0)    | 0.211  | 2(0.9)    | 7(1.8)    | 0.412  |
| 7  | <i>Stenotrophomonas maltophilia</i>     | 11(2.0)   | 2(2.8)   | 0.679 | 8(1.7)    | 5(3.0)    | 0.333  | 9(3.4)    | 4(1.1)    | 0.050  | 6(2.8)    | 7(1.8)    | 0.402  |
| 8  | <i>Nocardia</i>                         | 7(1.3)    | 0(0)     | 0.332 | 6(1.3)    | 1(0.6)    | 0.455  | 3(1.1)    | 4(1.1)    | 0.992  | 4(1.9)    | 3(0.8)    | 0.221  |
| 9  | <i>Corynebacterium striatum</i>         | 1(0.2)    | 1(1.4)   | 0.092 | 1(0.2)    | 1(0.6)    | 0.456  | 0(0)      | 2(0.6)    | 0.222  | 1(0.5)    | 1(0.2)    | 0.660  |
| 10 | <i>Comamonas acidovorans</i>            | 1(0.2)    | 1(1.4)   | 0.092 | 1(0.2)    | 1(0.6)    | 0.456  | 2(0.8)    | 0(0)      | 0.101  | 1(0.5)    | 1(0.3)    | 0.660  |
| 11 | <i>Cupriavidus pauculus</i>             | 1(0.2)    | 0(0)     | -     | 1(0.2)    | 0(0)      | -      | 0(0)      | 1(0.3)    | -      | 0(0)      | 1(0.3)    | -      |
| 12 | <i>Listeria monocytogenes</i>           | 0(0)      | 1(1.4)   | -     | 1(0.2)    | 0(0)      | -      | 0(0)      | 1(0.3)    | -      | 1(0.5)    | 0(0)      | -      |
| 13 | Multidrug resistance bacteria/ bacteria | 72(13.3)  | 17(23.6) | 0.019 | 44(9.8)   | 45(27.4)  | <0.001 | 49(43.8)  | 40(28.8)  | 0.011  | 44(20.4)  | 45(11.3)  | 0.002  |
| 14 | Fungus                                  | 170(31.4) | 29(40.3) | 0.129 | 124(27.5) | 75(45.7)  | <0.001 | 104(27.5) | 95(23.5)  | 0.001  | 101(46.8) | 98(24.6)  | <0.001 |
| 15 | Pneumocystis                            | 114(21.0) | 21(29.2) | 0.117 | 86(19.1)  | 49(29.9)  | 0.004  | 77(20.4)  | 58(14.3)  | <0.001 | 72(33.3)  | 63(15.8)  | <0.001 |
| 16 | Aspergillus                             | 55(10.1)  | 8(11.1)  | 0.800 | 37(8.2)   | 26(15.9)  | 0.006  | 27(7.1)   | 36(8.9)   | 0.975  | 29(13.4)  | 34(8.5)   | 0.057  |
| 17 | Cryptococcus                            | 1(0.2)    | 0(0)     | -     | 1(0.2)    | 0(0)      | -      | 0(0)      | 1(0.2)    | -      | 0(0)      | 1(0.3)    | -      |
| 18 | Virus                                   | 293(54.1) | 40(55.6) | 0.811 | 229(50.9) | 104(63.4) | 0.006  | 162(42.9) | 171(42.2) | 0.001  | 136(63.0) | 197(49.5) | 0.001  |
| 19 | Cytomegalovirus                         | 163(30.1) | 30(41.7) | 0.047 | 132(29.3) | 61(37.2)  | 0.063  | 98(25.9)  | 95(23.5)  | 0.006  | 91(42.1)  | 102(25.6) | <0.001 |
| 20 | Influenza A virus                       | 36(6.6)   | 2(2.8)   | 0.201 | 22(4.9)   | 16(9.8)   | 0.027  | 22(5.8)   | 16(4.0)   | 0.050  | 10(4.6)   | 28(7.0)   | 0.237  |
| 21 | Influenza B virus                       | 13(2.4)   | 1(1.4)   | 0.590 | 10(2.2)   | 4(2.4)    | 0.642  | 8(2.1)    | 6(1.5)    | 0.268  | 8(2.2)    | 6(1.5)    | 0.082  |
| 22 | Rhinovirus                              | 8(1.5)    | 0(0)     | 0.299 | 5(1.1)    | 3(1.8)    | 0.487  | 5(1.3)    | 3(0.7)    | 0.254  | 2(0.9)    | 6(1.5)    | 0.544  |
| 23 | Respiratory syncytial virus             | 38(7.0)   | 5(6.9)   | 0.983 | 35(7.8)   | 8(4.9)    | 0.213  | 12(3.2)   | 31(7.7)   | 0.042  | 11(5.1)   | 32(8.0)   | 0.172  |
| 24 | Adenovirus                              | 3(0.6)    | 0(0)     | 0.527 | 2(0.4)    | 1(0.6)    | 0.795  | 1(0.3)    | 2(0.5)    | 0.743  | 1(0.5)    | 2(0.4)    | 0.946  |
| 25 | Parainfluenza virus                     | 18(3.3)   | 2(2.8)   | 0.807 | 12(2.7)   | 8(4.9)    | 0.172  | 6(1.6)    | 14(3.5)   | 0.244  | 4(1.9)    | 16(3.7)   | 0.148  |
| 26 | HSV-1                                   | 4(0.7)    | 0(0)     | 0.465 | 3(0.7)    | 1(0.6)    | 0.938  | 4(1.1)    | 0(0)      | 0.020  | 2(0.9)    | 2(0.5)    | 0.533  |
| 27 | <i>Mycobacterium tuberculosis</i>       | 10(1.8)   | 0(0)     | 0.245 | 8(1.8)    | 2(1.2)    | 0.629  | 6(1.6)    | 4(1.0)    | 0.264  | 7(3.2)    | 3(0.8)    | 0.020  |

CAP, community-acquired pneumonia; HAP: hospital-acquired pneumonia; HSV-1: herpes simplex virus type 1.

**Table 3 Comparative analysis of Pneumocystis infection group and viral infection group**

| Variables                                           | Pneumocystis<br>infection group,<br>N=121 | Non-CMV viral<br>infection group,<br>N=106 | CMV viral<br>infection group<br>, N=87 | P-Value |
|-----------------------------------------------------|-------------------------------------------|--------------------------------------------|----------------------------------------|---------|
| Sex, female, n (%)                                  | 60(49.6)                                  | 47(44.3)                                   | 29(33.3)                               | 0.063   |
| Age, median (IGR)                                   | 56.0(43.5,65.0)                           | 62.0(51.8,68.3)                            | 63.0(52.0,70.0)                        | 0.001   |
| Nephrotic syndrome or chronic<br>glomerulonephritis | 34(28.1)                                  | 9(8.5)                                     | 2(2.3)                                 | 0.001   |
| Postoperative solid organ transplantation           | 7(5.0)                                    | 10(9.4)                                    | 5(5.7)                                 | 0.485   |
| Idiopathic interstitial pneumonia                   | 11(9.1)                                   | 24(22.6)                                   | 12(13.8)                               | 0.016   |
| Laboratory examination                              |                                           |                                            |                                        |         |
| White blood cell, $\times 10^9/L$ (IQR)             | 8.22 (5.59,11.48)                         | 8.76 (5.99,11.76)                          | 7.88(5.73,12.7)                        | 0.608   |
| Neutrophils, $\times 10^9/L$ (IQR)                  | 7.10(4.72,10.18)                          | 6.79 (4.64,9.79)                           | 6.33(4.39,10.77)                       | 0.723   |
| Lymphocyte, $\times 10^9/L$ (IQR)                   | 0.61 (0.40,1.00)                          | 0.90 (0.60,1.54)                           | 0.96(0.54,1.63)                        | <0.001  |
| Persistent lymphocytopenia                          | 67(55.4)                                  | 42(39.6)                                   | 35(40.2)                               | 0.028   |
| Oxygenation index                                   | 153.8(103.3,248.6)                        | 285.7(154.1,375.9)                         | 180.0(110.7,336.9)                     | <0.001  |
| Severe pneumonia index score                        | 75.0(58.0,107.0)                          | 79.0(60.0,99.0)                            | 89.0(69.0,117.0)                       | 0.980   |
| CURB65 score>1                                      | 34 (28.1)                                 | 33(31.1)                                   | 31(35.6)                               | 0.512   |
| Imaging features, n (%),24 missing                  |                                           |                                            |                                        |         |
| Consolidation or mass                               | 53(51.0)                                  | 47(44.3)                                   | 37(42.5)                               | 0.761   |
| Ground-glass opacity                                | 92(88.5)                                  | 63(59.4)                                   | 45(51.7)                               | <0.001  |
| Treatment, before admission, n (%)                  |                                           |                                            |                                        |         |
| High-dose steroids(>30mg/day)                       | 65(53.7)                                  | 28(26.4)                                   | 38(43.7)                               | <0.001  |
| Time of steroids use (month)                        | 3.0(2.0,5.0)                              | 6.0(2.0,24.0)                              | 4.0(2.0,12.0)                          | 0.033   |
| Receiving other immunosuppressants                  | 52(43.0)                                  | 55(51.9)                                   | 42(48.3)                               | 0.400   |
| Antibiotics                                         | 89(73.6)                                  | 69(65.1)                                   | 68(78.2)                               | 0.117   |
| Antiviral drugs                                     | 25(20.7)                                  | 22(20.8)                                   | 15(17.2)                               | 0.788   |
| Complications, n (%)                                |                                           |                                            |                                        |         |
| Noninvasive ventilation                             | 46(38.0)                                  | 24(22.6)                                   | 27(31.0)                               | 0.044   |
| Invasive mechanical ventilation                     | 36(29.8)                                  | 33(31.1)                                   | 23(26.4)                               | 0.768   |
| Respiratory failure                                 | 93(76.9)                                  | 48(45.3)                                   | 49(56.3)                               | <0.001  |
| ICU care                                            | 75(62.0)                                  | 42(39.6)                                   | 44(50.6)                               | 0.003   |
| Septic shock                                        | 35(28.9)                                  | 28(26.4)                                   | 19(21.8)                               | 0.516   |
| Extracorporeal membrane oxygenation                 | 4(3.3)                                    | 14(13.2)                                   | 4(4.6)                                 | 0.008   |
| 30-day mortality                                    | 39(32.2)                                  | 26(24.5)                                   | 20(23.0)                               | 0.257   |



| Variables        | Pneumocystis<br>infection group,<br>N=121 | Non-CMV viral<br>infection group,<br>N=106 | CMV viral<br>infection group<br>, N=87 | P-Value |
|------------------|-------------------------------------------|--------------------------------------------|----------------------------------------|---------|
| 90-day mortality | 45(37.2)                                  | 31(29.2)                                   | 23(26.4)                               | 0.213   |

Non-CMV virus: respiratory syncytial virus (RSV), influenza A virus, influenza B virus, human parainfluenza virus (HPIV), human rhinovirus (HRV), and adenovirus.

**Table 4 Cox regression analysis of prognostic factors in long-term glucocorticoid users with pneumonia patients**

| <i>Variables</i>           | 30-day mortality |              |                | 90-day mortality |              |                |
|----------------------------|------------------|--------------|----------------|------------------|--------------|----------------|
|                            | OR               | 95%CI        | <i>P</i> value | OR               | 95%CI        | <i>P</i> value |
| Septic shock               | 6.306            | 4.297-9.255  | <0.001         | 5.942            | 4.126-8.556  | <0.001         |
| Interstitial lung disease  | -                | -            | -              | 1.483            | 1.085-2.027  | 0.013          |
| Respiratory failure        | 12.583           | 4.995-31.699 | 0.001          | 9.053            | 3.639-22.524 | <0.001         |
| Persistent lymphocytopenia | 1.606            | 1.126-2.291  | 0.009          | 1.478            | 1.068-2.045  | 0.018          |
| Mechanical ventilation     | -                | -            | -              | 1.968            | 1.215-3.188  | 0.006          |
| High-dose steroids         | 1.402            | 1.007-1.952  | 0.046          | -                | -            | -              |

1  
2  
3  
4  
5  
6  
7  
8  
9  
10  
11  
12  
13  
14  
15  
16  
17  
18  
19  
20  
21  
22  
23  
24  
25  
26  
27  
28  
29  
30  
31  
32  
33  
34  
35  
36  
37  
38  
39  
40  
41  
42  
43  
44  
45  
46  
47  
48  
49  
50  
51  
52  
53  
54  
55  
56  
57  
58  
59  
60

For peer review only

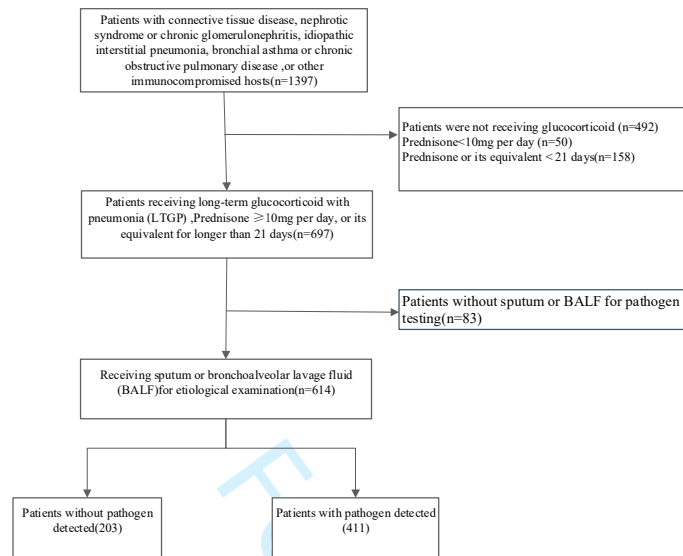

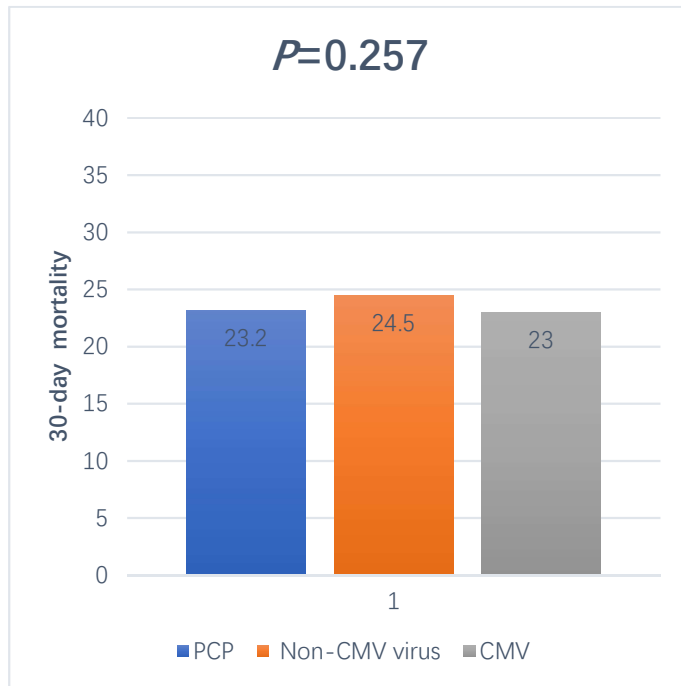

1  
2  
3  
4  
5  
6  
7  
8  
9  
10  
11  
12  
13  
14  
15  
16  
17  
18  
19  
20  
21  
22  
23  
24  
25  
26  
27  
28  
29  
30  
31  
32  
33  
34  
35  
36  
37  
38  
39  
40  
41  
42  
43  
44  
45  
46  
47  
48  
49  
50  
51  
52  
53  
54  
55  
56  
57  
58  
59  
60

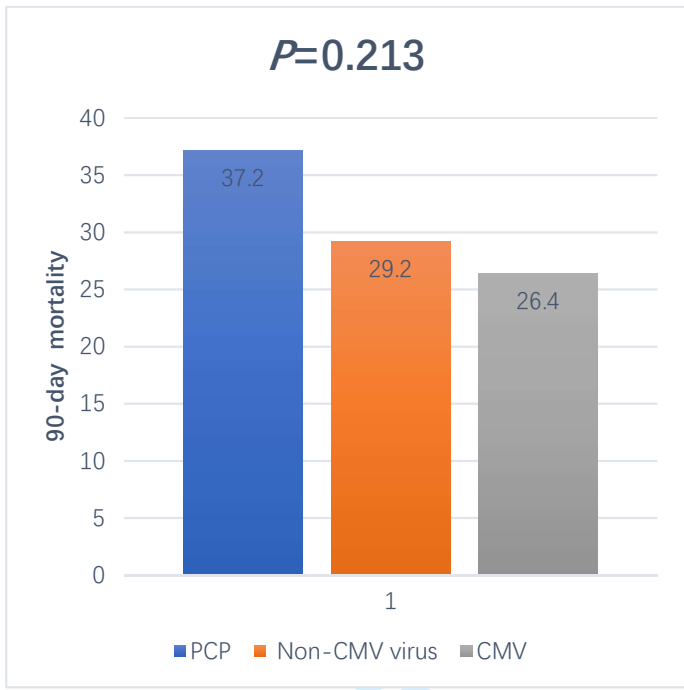

Peer review only

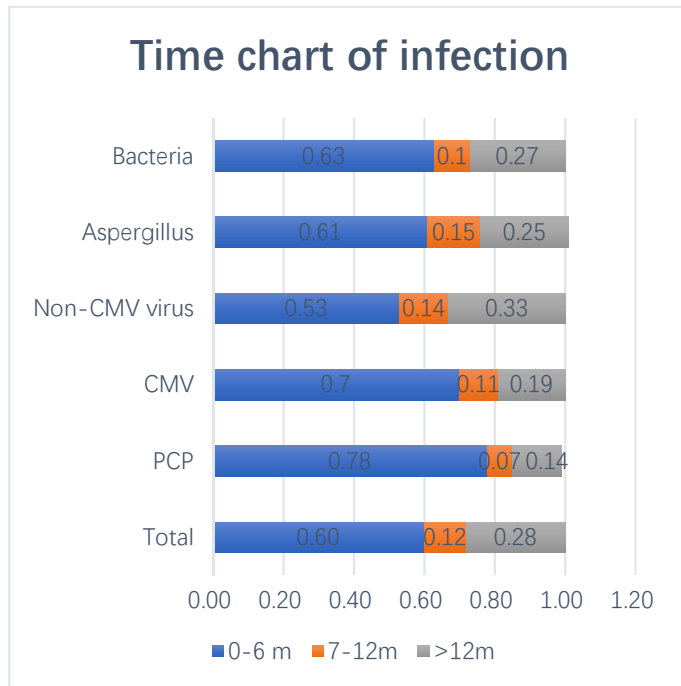

STROBE Statement—Checklist of items that should be included in reports of *cohort studies*

|                              | Item No | Recommendation                                                                                                                                                                                                                                                                                                         | Page No        |
|------------------------------|---------|------------------------------------------------------------------------------------------------------------------------------------------------------------------------------------------------------------------------------------------------------------------------------------------------------------------------|----------------|
| <b>Title and abstract</b>    | 1       | (a) Indicate the study's design with a commonly used term in the title or the abstract<br>(b) Provide in the abstract an informative and balanced summary of what was done and what was found                                                                                                                          | 1-2            |
| <b>Introduction</b>          |         |                                                                                                                                                                                                                                                                                                                        |                |
| Background/rationale         | 2       | Explain the scientific background and rationale for the investigation being reported                                                                                                                                                                                                                                   | 2-3            |
| Objectives                   | 3       | State specific objectives, including any prespecified hypotheses                                                                                                                                                                                                                                                       | 2-3            |
| <b>Methods</b>               |         |                                                                                                                                                                                                                                                                                                                        |                |
| Study design                 | 4       | Present key elements of study design early in the paper                                                                                                                                                                                                                                                                |                |
| Setting                      | 5       | Describe the setting, locations, and relevant dates, including periods of recruitment, exposure, follow-up, and data collection                                                                                                                                                                                        |                |
| Participants                 | 6       | (a) Give the eligibility criteria, and the sources and methods of selection of participants. Describe methods of follow-up<br>(b) For matched studies, give matching criteria and number of exposed and unexposed                                                                                                      | 4-5            |
| Variables                    | 7       | Clearly define all outcomes, exposures, predictors, potential confounders, and effect modifiers. Give diagnostic criteria, if applicable                                                                                                                                                                               | 4-5            |
| Data sources/<br>measurement | 8*      | For each variable of interest, give sources of data and details of methods of assessment (measurement). Describe comparability of assessment methods if there is more than one group                                                                                                                                   | 4-5            |
| Bias                         | 9       | Describe any efforts to address potential sources of bias                                                                                                                                                                                                                                                              | -              |
| Study size                   | 10      | Explain how the study size was arrived at                                                                                                                                                                                                                                                                              | 4              |
| Quantitative variables       | 11      | Explain how quantitative variables were handled in the analyses. If applicable, describe which groupings were chosen and why                                                                                                                                                                                           | 5              |
| Statistical methods          | 12      | (a) Describe all statistical methods, including those used to control for confounding<br>(b) Describe any methods used to examine subgroups and interactions<br>(c) Explain how missing data were addressed<br>(d) If applicable, explain how loss to follow-up was addressed<br>(e) Describe any sensitivity analyses | 6              |
| <b>Results</b>               |         |                                                                                                                                                                                                                                                                                                                        |                |
| Participants                 | 13*     | (a) Report numbers of individuals at each stage of study—eg numbers potentially eligible, examined for eligibility, confirmed eligible, included in the study, completing follow-up, and analysed<br>(b) Give reasons for non-participation at each stage<br>(c) Consider use of a flow diagram                        | 7 and Figure 1 |
| Descriptive data             | 14*     | (a) Give characteristics of study participants (eg demographic, clinical, social) and information on exposures and potential confounders<br>(b) Indicate number of participants with missing data for each variable of interest<br>(c) Summarise follow-up time (eg, average and total amount)                         | 7-8            |
| Outcome data                 | 15*     | Report numbers of outcome events or summary measures over time                                                                                                                                                                                                                                                         | 7-8            |

|                                      |                          |    |                                                                                                                                                                                                                                                                                                                                                                                                               |              |
|--------------------------------------|--------------------------|----|---------------------------------------------------------------------------------------------------------------------------------------------------------------------------------------------------------------------------------------------------------------------------------------------------------------------------------------------------------------------------------------------------------------|--------------|
| 1<br>2<br>3<br>4<br>5<br>6<br>7<br>8 | Main results             | 16 | (a) Give unadjusted estimates and, if applicable, confounder-adjusted estimates and their precision (eg, 95% confidence interval). Make clear which confounders were adjusted for and why they were included<br>(b) Report category boundaries when continuous variables were categorized<br>(c) If relevant, consider translating estimates of relative risk into absolute risk for a meaningful time period | 7-8          |
| 9<br>10<br>11                        | Other analyses           | 17 | Report other analyses done—eg analyses of subgroups and interactions, and sensitivity analyses                                                                                                                                                                                                                                                                                                                | 7-8, Table 3 |
| 12                                   | <b>Discussion</b>        |    |                                                                                                                                                                                                                                                                                                                                                                                                               |              |
| 13                                   | Key results              | 18 | Summarise key results with reference to study objectives                                                                                                                                                                                                                                                                                                                                                      | 9            |
| 14<br>15<br>16                       | Limitations              | 19 | Discuss limitations of the study, taking into account sources of potential bias or imprecision. Discuss both direction and magnitude of any potential bias                                                                                                                                                                                                                                                    | 11-12        |
| 17<br>18                             | Interpretation           | 20 | Give a cautious overall interpretation of results considering objectives, limitations, multiplicity of analyses, results from similar studies, and other relevant evidence                                                                                                                                                                                                                                    | 9-11         |
| 19<br>20                             | Generalisability         | 21 | Discuss the generalisability (external validity) of the study results                                                                                                                                                                                                                                                                                                                                         | 9-11         |
| 21                                   | <b>Other information</b> |    |                                                                                                                                                                                                                                                                                                                                                                                                               |              |
| 22<br>23<br>24                       | Funding                  | 22 | Give the source of funding and the role of the funders for the present study and, if applicable, for the original study on which the present article is based                                                                                                                                                                                                                                                 | 12           |

\*Give information separately for exposed and unexposed groups.

**Note:** An Explanation and Elaboration article discusses each checklist item and gives methodological background and published examples of transparent reporting. The STROBE checklist is best used in conjunction with this article (freely available on the Web sites of PLoS Medicine at <http://www.plosmedicine.org/>, Annals of Internal Medicine at <http://www.annals.org/>, and Epidemiology at <http://www.epidem.com/>). Information on the STROBE Initiative is available at <http://www.strobe-statement.org>.



# BMJ Open

## Etiology and prognostic risk factors of mortality among pneumonia patients receiving long-term glucocorticoids: a retrospective cohort study

|                                 |                                                                                                                                                                                                                                                                                                                                                                                                                                                                                                                                                                                                                                                                                                                                                                                             |
|---------------------------------|---------------------------------------------------------------------------------------------------------------------------------------------------------------------------------------------------------------------------------------------------------------------------------------------------------------------------------------------------------------------------------------------------------------------------------------------------------------------------------------------------------------------------------------------------------------------------------------------------------------------------------------------------------------------------------------------------------------------------------------------------------------------------------------------|
| Journal:                        | <i>BMJ Open</i>                                                                                                                                                                                                                                                                                                                                                                                                                                                                                                                                                                                                                                                                                                                                                                             |
| Manuscript ID                   | bmjopen-2020-037419.R1                                                                                                                                                                                                                                                                                                                                                                                                                                                                                                                                                                                                                                                                                                                                                                      |
| Article Type:                   | Original research                                                                                                                                                                                                                                                                                                                                                                                                                                                                                                                                                                                                                                                                                                                                                                           |
| Date Submitted by the Author:   | 01-Jun-2020                                                                                                                                                                                                                                                                                                                                                                                                                                                                                                                                                                                                                                                                                                                                                                                 |
| Complete List of Authors:       | Li, Lijuan; China-Japan Friendship Hospital, Hsu, Steven H.; Houston Methodist Hospital<br>Gu, Xiaoying; China-Japan Friendship Hospital<br>Jiang, Shan; China-Japan Friendship Hospital<br>Shang, Lianhan; China-Japan Friendship Hospital<br>Sun, Guolei; China-Japan Friendship Hospital<br>Sun, Lingxiao; China-Japan Friendship Hospital<br>Zhang, Li; China-Japan Friendship Hospital<br>Wang, Chuan; First Hospital of Shijiazhuang<br>Ren, Yali; Second Hospital of Hebei Medical University<br>Wang, Jinxiang; Capital Medical University, respiratory and critical care medicine, Beijing Luhe Hospital<br>Pan, Jianliang; Second People's Hospital of Weifang<br>Liu, Jiangbo<br>Bin, Cao; China-Japan Friendship Hospital, Department of Respiratory and Critical Care Medicine |
| <b>Primary Subject Heading</b>: | Infectious diseases                                                                                                                                                                                                                                                                                                                                                                                                                                                                                                                                                                                                                                                                                                                                                                         |
| Secondary Subject Heading:      | Intensive care, Respiratory medicine                                                                                                                                                                                                                                                                                                                                                                                                                                                                                                                                                                                                                                                                                                                                                        |
| Keywords:                       | INFECTIOUS DISEASES, Adult intensive & critical care < INTENSIVE & CRITICAL CARE, Diagnostic microbiology < INFECTIOUS DISEASES, Microbiology < NATURAL SCIENCE DISCIPLINES, Respiratory infections < THORACIC MEDICINE                                                                                                                                                                                                                                                                                                                                                                                                                                                                                                                                                                     |
|                                 |                                                                                                                                                                                                                                                                                                                                                                                                                                                                                                                                                                                                                                                                                                                                                                                             |

SCHOLARONE™  
Manuscripts

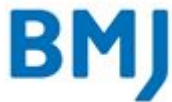

I, the Submitting Author has the right to grant and does grant on behalf of all authors of the Work (as defined in the below author licence), an exclusive licence and/or a non-exclusive licence for contributions from authors who are: i) UK Crown employees; ii) where BMJ has agreed a CC-BY licence shall apply, and/or iii) in accordance with the terms applicable for US Federal Government officers or employees acting as part of their official duties; on a worldwide, perpetual, irrevocable, royalty-free basis to BMJ Publishing Group Ltd ("BMJ") its licensees and where the relevant Journal is co-owned by BMJ to the co-owners of the Journal, to publish the Work in this journal and any other BMJ products and to exploit all rights, as set out in our [licence](#).

The Submitting Author accepts and understands that any supply made under these terms is made by BMJ to the Submitting Author unless you are acting as an employee on behalf of your employer or a postgraduate student of an affiliated institution which is paying any applicable article publishing charge ("APC") for Open Access articles. Where the Submitting Author wishes to make the Work available on an Open Access basis (and intends to pay the relevant APC), the terms of reuse of such Open Access shall be governed by a Creative Commons licence – details of these licences and which [Creative Commons](#) licence will apply to this Work are set out in our licence referred to above.

Other than as permitted in any relevant BMJ Author's Self Archiving Policies, I confirm this Work has not been accepted for publication elsewhere, is not being considered for publication elsewhere and does not duplicate material already published. I confirm all authors consent to publication of this Work and authorise the granting of this licence.

# Etiology and prognostic risk factors of mortality among pneumonia patients receiving glucocorticoids: a retrospective cohort study

Lijuan Li<sup>1</sup>, Steven H. Hsu<sup>2</sup>, Xiaoying Gu<sup>3</sup>, Shan Jiang<sup>1</sup>, Lianhan Shang<sup>1</sup>, Guolei Sun<sup>1</sup>, Lingxiao Sun<sup>4</sup>, Li Zhang<sup>1</sup>,  
Chuan Wang<sup>5</sup>, Yali Ren<sup>6</sup>, Jinxiang Wang<sup>7</sup>, Jianliang Pan<sup>8</sup>, Jiangbo Liu<sup>9</sup>, Bin Cao<sup>1,10,11</sup>

1. Department of Pulmonary and Critical Care Medicine, National Center for Clinical Research on Respiratory Diseases, China-Japan Friendship Hospital, Beijing 100029, China

2. Department of Medicine, Houston Methodist Hospital, Houston, TX 77030, USA

3. Department of Institute of Clinical Medical Sciences, China-Japan Friendship Hospital, Institute of Respiratory Medicine, Chinese Academy of Medicine Science, National Clinical Research Center of Respiratory Diseases, Beijing 10029, China

4. Clinical Center for Pulmonary Infections, Capital Medical University, Beijing 100029, China

5. Department of Pulmonary and Critical Care Medicine, First Hospital of Shijiazhuang, Shijiazhuang 050011, China

6. Department of Pulmonary and Critical Care Medicine, Second Hospital of Hebei Medical University, Shijiazhuang 050000, China

7. Department of Respiratory and Critical Care Medicine, Beijing Luhe Hospital of Capital Medical University, Beijing 101100, China

8. Department of Pulmonary and Critical Care Medicine, Second People's Hospital of Weifang, Weifang 261041, China

9. Department of Pulmonary and Critical Care Medicine, Tianjin First Central Hospital, Tianjin 300192, China

10. Institute of Respiratory Medicine, Chinese Academy of Medical Science, Beijing 100029, China

11. Tsinghua University-Peking University Joint Center for Life Sciences, Beijing, China

\* Corresponding author: Bin Cao, caobin\_ben@163.com, Department of Pulmonary and Critical Care Medicine, China-Japan Friendship Hospital; Laboratory of Clinical Microbiology and Infectious Diseases; Institute of Respiratory Medicine, Chinese Academy of Medical Science; National Clinical Research Center of Respiratory Diseases, Clinical Center for Pulmonary

1  
2  
3  
4 Infections, Capital Medical University; Tsinghua University-Peking University Joint Center for Life  
5 Sciences, Beijing 100029, China  
6  
7  
8

9 **Word Count:** 3374  
10  
11  
12  
13  
14  
15  
16  
17  
18  
19  
20  
21  
22  
23  
24  
25  
26  
27  
28  
29  
30  
31  
32  
33  
34  
35  
36  
37  
38  
39  
40  
41  
42  
43  
44  
45  
46  
47  
48  
49  
50

51  
52 **ABSTRACT**  
53

54 **Objective:** Long-term use of high-dose glucocorticoids may result in severe immunosuppression,  
55 and leads to increase risk of treatment-resistant pneumonia and mortality. We investigated the  
56 etiology and prognostic risk factors of mortality in hospitalized patients with pneumonia and  
57 receiving glucocorticoid therapy.  
58  
59  
60

1  
2  
3  
4 **Design:** A retrospective cohort study.

5 **Setting:** Six secondary and tertiary academic hospitals in China.

6  
7 **Participants:** Patients receiving glucocorticoids who were hospitalized with pneumonia between  
8  
9 1<sup>st</sup> January 2013 and 31<sup>st</sup> December 2019.

10  
11 **Main Outcomes:** Prevalence of comorbidities, microbiology and antibiotic susceptibility patterns,  
12  
13 30-day and 90-day mortality, and prognostic risk factors were analysed.

14  
15 **Results:** A total of 716 patients were included. Pathogens were identified in 69.8% of patients.  
16  
17 Significant morbidities including respiratory failure (50.8%), intensive care unit (ICU) transfer  
18  
19 (40.8%), and mechanical ventilation (36%). The 90-day mortality was 26.0%. Diagnosis of  
20  
21 pneumonia occurred within 6 months of glucocorticoid initiation for 69.7% of patients with  
22  
23 Cytomegalovirus (CMV) pneumonia and 79.0% of patients with Pneumocystis jirovecii  
24  
25 pneumonia (PCP). Pathogens, including PCP, CMV, and multidrug-resistant bacteria, were  
26  
27 identified more frequently in patients with persistent lymphocytopenia and high-dose  
28  
29 glucocorticoid ( $\geq 30$  mg/day of prednisolone or equivalent within 30 days before admission). For  
30  
31 non-CMV viral pneumonia, the 90-day mortality was lower than those with PCP ( $P < 0.05$ ) but  
32  
33 similar to CMV (24.2% vs 38.1% vs 27.4%). Cox regression analysis indicated septic shock,  
34  
35 respiratory failure, persistent lymphocytopenia, interstitial lung disease, and high-dose  
36  
37 glucocorticoid use were independent negative predictors for mortality.

38  
39 **Conclusions:** Patients receiving glucocorticoid therapy with pneumonia experienced higher rates  
40  
41 of opportunistic infections, and significantly increased risks of morbidity and mortality. This  
42  
43 information should be carefully considered when determining treatment for this patient  
44  
45 population.

46  
47  
48 **KEYWORDS:** Pneumonia; Immunocompromised; Glucocorticoids; Prognosis.

## 49 50 51 52 53 54 **ARTICLE SUMMARY**

### 55 56 **Strengths and limitations of this study**

57  
58 This is the first large-scale investigation of the etiology and prognostic risk factors of pneumonia  
59  
60 in patients with glucocorticoid use.

1  
2  
3  
4 The study includes a large sample size, multicenter (six hospitals in China), and sputum or  
5 bronchoalveolar lavage examined in all patients.

6  
7 The retrospective design poses a limitation. Not all pneumonia patients underwent a full array of  
8 pathogen testing, and some pathogens were not identified until at least 48 hours after admission,  
9 increasing the possibility of nosocomial infections.  
10  
11  
12  
13  
14  
15  
16  
17  
18  
19  
20  
21  
22  
23  
24  
25  
26  
27  
28  
29  
30  
31  
32  
33  
34  
35  
36  
37  
38  
39  
40  
41  
42  
43  
44  
45  
46  
47  
48  
49  
50  
51  
52  
53

## 54 **INTRODUCTION**

55  
56 Long-term use of glucocorticoids at high-doses may result in severe immunosuppression and serious  
57 infections.<sup>1</sup> Pulmonary infections occur most commonly and remain one of the leading causes of  
58 death in immunocompromised patients.<sup>1-4</sup> Infections caused by opportunistic pathogens, including  
59  
60

1  
2  
3  
4 *Cytomegalovirus* (CMV), *Pneumocystis*, and *Aspergillus*, have been reported in  
5 immunocompromised patients receiving glucocorticoids.<sup>2-4</sup> Mortality up to 45% was found in  
6 rheumatic patients on long-term glucocorticoids who developed pulmonary infections, and it  
7 increased to 93% for those requiring mechanical ventilation.<sup>1</sup> The paucity of studies regarding  
8 patients receiving glucocorticoid therapy who develop pneumonia may potentially lead to an  
9 underestimate of its prevalence and overestimate the disease burden. This may result in  
10 mismanagement with excessive use of broad-spectrum antibiotics and treatment failure in the  
11 absence of therapeutic guidance based on pathogenic data. Given the significant morbidity and  
12 mortality associated with glucocorticoid-induced immunosuppression, our study aims to identify  
13 the clinical characteristics, pathogenic etiologies, and prognostic risk factors of pneumonia in this  
14 population.  
15  
16  
17  
18  
19  
20  
21  
22  
23  
24  
25  
26

## 27 **METHODS**

### 28 **Study design and participants**

29  
30 We retrospectively recruited patients with pneumonia hospitalized between 1<sup>st</sup> January 2013  
31 and 31<sup>st</sup> December 2017 at 6 secondary and tertiary academic hospitals in China. Diagnosis of  
32 pneumonia was based on the American Thoracic Society and Infectious Disease Society of  
33 America (ATS/IDSA) guidelines.<sup>5-6</sup> Pneumonia was defined as the presence of a new pulmonary  
34 infiltrate on chest radiograph or CT scan showing infiltrate or interstitial changes and was  
35 combined with 1 or more of the following clinical manifestations: (1) recent cough, sputum or  
36 aggravation of respiratory symptoms, the emergence of purulent sputum, with or without chest  
37 pain; (2) fever (defined as axillary temperature  $\geq 37.3^{\circ}\text{C}$ ) or hypothermia (axillary temperature  
38  $< 36^{\circ}\text{C}$ ); (3) signs of pulmonary consolidation and (or) moist crackles; or (4) white cell  
39 count  $>10 \times 10^9/\text{L}$  or  $<4 \times 10^9/\text{L}$ , with or without neutrophil predominance. Patients with connective  
40 tissue disease, nephrotic syndrome or chronic glomerulonephritis, idiopathic interstitial  
41 pneumonia, bronchial asthma or chronic obstructive pulmonary disease, or other  
42 immunocompromised hosts were selected. All patients were selected based on the following  
43 inclusion criteria: (1) oral or intravenous glucocorticoid treatment<sup>7-9</sup> before admission; (2)  
44 diagnosed pneumonia on admission or during hospitalization; (3) at least 16-year-old. The  
45 exclusion criteria were as follows: (1) non-infectious pulmonary diseases including lung cancer,  
46  
47  
48  
49  
50  
51  
52  
53  
54  
55  
56  
57  
58  
59  
60

1  
2  
3  
4 interstitial lung disease without infection, pulmonary embolism, and heart failure; (2) less than 16  
5 years old; (3) those who cannot provide consent for procedure.

### 7 **Quality control of the study**

9 Key investigators, including clinicians, statisticians, microbiologists, and radiologists,  
10 worked together to draft the protocol and created a single formatted case report form (CRF) that  
11 was used by all centers. Before the study initiation, all investigators from the 6 centers received  
12 training on the protocol, screening process, definition of underlying diseases, and formatted CRF.  
13 After data were collected, the CRF was reviewed by a trained researcher to ensure its  
14 completeness and data quality. The study was led and approved by the Ethics Committee at China-  
15 Japan Friendship Hospital with centralised collaboration with all participating hospitals, which  
16 included the anonymized data submission and collection.

### 25 **Data collection**

27 The following data were collected from the medical records of patients during  
28 hospitalization: (1) demographics; (2) clinical symptoms; (3) initial vital signs and lung  
29 examination; (4) severity of disease [evaluated by intensive care unit (ICU) admission, use of  
30 invasive or noninvasive mechanical ventilation, Pneumonia Severity Index (PSI) score, and/or  
31 CURB-65 score];<sup>10-12</sup> (5) laboratory and microbiological data (blood, sputum and/or  
32 bronchoalveolar lavage samples, bacterial or fungal cultures, viral nucleic acid detection, and  
33 antibiotic susceptibility patterns); (6) treatment information including vasoactive(s),  
34 antimicrobial(s), glucocorticoids, and other immunosuppressants use; (7) survival status during 30  
35 days and 90 days after admission. High-dose steroid use was defined as equal to or greater than  
36 30mg per day of prednisolone or equivalent within 30 days after admission. Persistent  
37 lymphocytopenia was defined as peripheral blood lymphocyte count lower than  $1 \times 10^9/L$  for  
38 greater than 7 days.

### 51 **Diagnostic procedures**

52 After the identification of pulmonary infiltrates on chest radiograph, bronchoalveolar lavage  
53 (BAL) or sputum samples were obtained by treating physicians. Microorganisms were identified  
54 and tested for drug sensitivity. Bronchoscopic examination was performed according to general  
55 guidelines. Lidocaine spray was applied for local anesthesia to upper airway and carina, and  
56 airways were thoroughly examined. The BAL was performed by instilling 60 to 120 mL of sterile  
57  
58  
59  
60



1  
2  
3  
4 saline solution 2 to 4 times into the distal bronchial tree, either at the affected lobe or in the middle  
5 lung lobe with more radiographic abnormalities. BAL specimens were aliquoted and immediately  
6 transported to the laboratories. The bacterial cultures were incubated at 35°C in 5–10% CO<sub>2</sub> for 48  
7 hours. If *Nocardia* was suspected, the incubation time was prolonged. Fungal cultures were  
8 incubated at 27°C for 5 days under ambient conditions. The species were identified using Matrix-  
9 Assisted Laser Desorption/Ionization Time-of-Flight Mass Spectrometry (Brooks Instrument,  
10 Germany) or the BACTEC 9102 culture instrument (BD Biosciences, USA). Respiratory viral and  
11 atypical pathogens were detected by polymerase chain reaction (PCR) (Shanghai Zhijiang  
12 Biological Technology, China). The Platelia Aspergillus test was used for galactomannan  
13 detection (Bio-Rad Laboratories, Marnes-la-Coquette, France).

### 23 **Pathogen-specific diagnostic information**

24  
25 We defined multidrug-resistance (MDR) in specific organisms using the European Centre for  
26 Disease Prevention and Control (ECDC) and the Centers for Disease Control and Prevention  
27 (CDC) criteria. We included the following species in this category: methicillin-resistant  
28 *Staphylococcus aureus* (MRSA), vancomycin-resistant *Enterococcus* (VRE), and  
29 *Enterobacteriaceae* producing extended-spectrum beta-lactamases (ESBL). *Pseudomonas*  
30 *aeruginosa*, *Acinetobacter baumannii* and other nonfermenting Gram-negative bacilli were  
31 considered to be MDR pathogens if not susceptible to at least one agent in three or more  
32 antimicrobial categories.<sup>13 14</sup>

33  
34 For the diagnosis of pneumonia caused by atypical pathogens, the demonstration of  
35 *Legionella* spp, *Mycoplasma pneumoniae*, or *Mycobacterium* DNA by PCR was considered  
36 positive. The diagnosis of viral infections was based on positive nucleic acid test. As for the  
37 pneumonia caused by *Aspergillus*, one or more of the following criteria were required for a  
38 positive diagnosis: (1) histopathologic or direct microscopic evidence of dichotomous septate  
39 hyphae with a positive culture for *Aspergillus* from tissue, (2) a positive *Aspergillus* culture from  
40 BAL, (3) a galactomannan optical index on BAL of  $\geq 1$ , (4) a galactomannan optical index on  
41 serum of  $\geq 0.5$ . (5) *Aspergillus* species identified by culture characteristics and microscopic  
42 morphology.<sup>15 16</sup>

43  
44 The diagnosis of *Pneumocystis jirovecii* pneumonia (PCP) required the following criteria: (1)  
45 high-resolution computed tomography (HRCT) imaging showing diffuse ground-glass opacity  
46  
47  
48  
49  
50  
51  
52  
53  
54  
55  
56  
57  
58  
59  
60

(GGO) with patchy distribution; (2) mycological criteria: microscopic examination of the respiratory sample revealing the presence of *Pneumocystis* cystic or trophic forms or the PCR testing positive for *Pneumocystis* DNA using PCR.<sup>17</sup>

### Statistical analysis

The demographics, clinical characteristics, and pathogen testing results were expressed as mean ( $\pm$  standard deviation), median (interquartile range), or numbers (percentage). The group comparisons were conducted using the t-test or Wilcoxon rank-sum test for continuous variables with and without normal distributions, respectively. Comparisons between groups for categorical variables were made using the  $\chi^2$  test. Histogram chart was used to depict the glucocorticoid application timeline. Distributions for the duration of glucocorticoid use among different respiratory pathogens were also compared using  $\chi^2$  test. Cox regression models were used to analyse the association of septic shock, interstitial lung disease, invasive and noninvasive mechanical ventilation, partial pressure of arterial oxygen and fraction of inspired oxygen ratio ( $\text{PaO}_2/\text{FiO}_2$ ), and persistent lymphocytopenia with 30-day and 90-day mortality. In the Cox analysis, age, gender, noninvasive mechanical ventilation, invasive mechanical ventilation, respiratory failure, septic shock, ICU admission, high-dose corticosteroids, persistent lymphocytopenia, interstitial lung disease, severe pneumonia index score, CURB65 score, PCP, CMV, and non-CMV viral infection were adjusted.

Statistical analyses were performed using SPSS, version 19.0 (SPSS, Inc., Chicago, Illinois). All tests were 2 sided, and  $P$ -value  $< 0.05$  was considered to be statistically significant.

### Patient and Public Involvement

No patients nor the public were involved in the development of the research question or study design and will not be involved in recruitment or conduct of the study.

### RESULTS

Between 1<sup>st</sup> January 2013 and 31<sup>st</sup> December 2017, 1397 immunocompromised patients with pneumonia were selected. The underlying diseases including connective tissue disease, nephrotic syndrome, chronic nephritis, idiopathic pulmonary fibrosis, or other diseases with immunocompromised state. After excluding patients not receiving oral or intravenous glucocorticoids ( $N=492$ ) and those without sputum or BAL for pathogen testing ( $N=189$ ), 716 pneumonia with receiving glucocorticoids (GP) were included in the final analysis (Figure 1).

About 48% of patients were female with a median age of 60. The main presenting symptoms were fever (74.6%), cough (87.7%), and dyspnea (60.2%). The most common underlying immune-related diseases were connective tissue disease (52.1%), interstitial lung disease (45.3%), diabetes (25%), and nephrotic syndrome or chronic glomerulonephritis (12.8%). The average time (months, IQR) of taking glucocorticoids was 4 (2,18) months. The positive rate of pathogen testing was 69.8% (500/716). Among the 292 (40.8%) patients who required ICU admission, 24.2% and 24% received noninvasive and invasive ventilation, respectively. The 30-day and 90-day mortality were 22.6% and 26.0%, respectively. The complication rates were similar between patients on glucocorticoid and immunosuppressant and those on glucocorticoid only (Table 1).

**Table 1** Clinical characteristics of pneumonia between glucocorticoid users and those glucocorticoids with immunosuppressants users

| Variables                               | Total, N=716        | Glucocorticoid users, N=297 | Glucocorticoid with immunosuppressants* users, N=419 | P-Value |
|-----------------------------------------|---------------------|-----------------------------|------------------------------------------------------|---------|
| Sex, female, n (%)                      | 341(47.6)           | 123(41.4)                   | 218(52.0)                                            | 0.005   |
| Age, median (IQR)                       | 60(49, 68)          | 62.0(52.0, 70.0)            | 59.0(46.0, 67.0)                                     | <0.001  |
| Symptoms and signs, n (%)               |                     |                             |                                                      |         |
| Fever                                   | 534(74.6)           | 225(75.8)                   | 309(73.7)                                            | 0.543   |
| Cough                                   | 628(87.7)           | 267(89.9)                   | 361(86.2)                                            | 0.133   |
| Sputum production                       | 580(81.0)           | 239(80.5)                   | 341(81.4)                                            | 0.829   |
| Dyspnea                                 | 431(60.2)           | 185(62.3)                   | 246(58.7)                                            | 0.335   |
| Disturbance of consciousness            | 40(6.2)             | 11(3.7)                     | 29(6.9)                                              | 0.065   |
| Laboratory examination                  |                     |                             |                                                      |         |
| White blood cell, $\times 10^9/L$ (IQR) | 7.94(5.79, 11.60)   | 9.27 (6.37, 12.63)          | 7.51 (5.37, 10.97)                                   | <0.001  |
| Neutrophils, $\times 10^9/L$ (IQR)      | 6.49(4.28, 10.08)   | 7.35(4.89, 10.83)           | 6.05 (4.10, 9.35)                                    | <0.001  |
| Lymphocyte, $\times 10^9/L$ (IQR)       | 0.85(0.50, 1.38)    | 0.95 (0.60, 1.46)           | 0.80 (0.45, 1.30)                                    | 0.004   |
| Persistent lymphocytopenia              | 304(42.7)           | 113(38.0)                   | 191(45.6)                                            | 0.044   |
| Mean hemoglobin $\pm$ SD, g/L           | 111.8 $\pm$ 23.9    | 113.1 $\pm$ 24.2            | 108.4 $\pm$ 22.8                                     | 0.034   |
| Mean albumin $\pm$ SD, g/L              | 32.4 $\pm$ 6.4      | 33.3 $\pm$ 6.2              | 29.9 $\pm$ 6.1                                       | <0.001  |
| Lactate dehydrogenase, U/L              | 328.5(227.8, 506.0) | 338.0 (226.0, 528.0)        | 312.0 (228.5, 495.0)                                 | 0.525   |
| Blood urea nitrogen, mmol/L             | 6.28(4.60, 9.80)    | 6.24 (4.60, 9.40)           | 6.50 (4.63, 10.24)                                   | 0.372   |
| Serum creatinine, mmol/L                | 64.0(50.8, 90.2)    | 62.6 (50.0, 81.2)           | 65.9 (51.1, 99.1)                                    | 0.157   |
| Procalcitonin, ng/ml                    | 0.28(0.12, 0.77)    | 0.29 (0.14, 0.71)           | 0.27(0.11, 0.81)                                     | 0.613   |
| Oxygenation index                       | 241.4(126.6, 347.6) | 228.0(128.1, 351.2)         | 243.1(122.4, 347.6)                                  | <0.001  |
| Severe pneumonia index score            | 76.5(59.3, 101.0)   | 77.0(60.0, 103.0)           | 76.0(57.0, 100.0)                                    | 0.845   |
| CURB65 score>1                          | 211(29.5)           | 88(29.6)                    | 123(1.0, 2.0)                                        | 0.937   |

| Variables                                                           | Total, N=716   | Glucocorticoid users,<br>N=297 | Glucocorticoid with<br>immunosuppressants*<br>users, N=419 | P-Value |
|---------------------------------------------------------------------|----------------|--------------------------------|------------------------------------------------------------|---------|
| Underlying immune defect, n (%)                                     |                |                                |                                                            |         |
| Diabetes mellitus                                                   | 179(25.0)      | 63(21.2)                       | 116(27.7)                                                  | 0.049   |
| Tumor                                                               | 43(6.0)        | 20(6.7)                        | 23(5.5)                                                    | 0.490   |
| Connective tissue disease**                                         | 368(51.4)      | 111(37.4)                      | 257(61.3)                                                  | <0.001  |
| Interstitial lung disease                                           | 324(45.3)      | 115(38.7)                      | 209(49.9)                                                  | 0.003   |
| Nephrotic syndrome or chronic<br>glomerulonephritis                 | 90(12.6)       | 42(14.1)                       | 48(11.5)                                                   | 0.286   |
| Idiopathic interstitial pneumonia                                   | 73(10.2)       | 56(18.9)                       | 17(4.1)                                                    | <0.001  |
| Bronchial asthma or chronic obstructive<br>pulmonary disease        | 30(4.2)        | 30(10.1)                       | 0(0)                                                       | <0.001  |
| Lymphoma                                                            | 17(2.4)        | 8(2.7)                         | 9(2.1)                                                     | 0.628   |
| Bone marrow or hematopoietic stem cell<br>transplant                | 7(1.0)         | 1(0.3)                         | 6(1.4)                                                     | 0.144   |
| Solid organ transplant                                              | 63(8.8)        | 0(0)                           | 63(15.0)                                                   | <0.001  |
| Radiation pneumonitis                                               | 8(1.1)         | 7(2.4)                         | 1(0.2)                                                     | 0.008   |
| Other immunocompromised hosts†                                      | 65(9.1)        | 46(15.5)                       | 19(4.5)                                                    | <0.001  |
| Bronchoalveolar lavage, n (%)                                       | 366(51.1)      | 248(83.5)                      | 118(28.2)                                                  | <0.001  |
| Total pathogenic positive rate                                      | 500(69.8)      | 218(73.4)                      | 282(67.3)                                                  | 0.080   |
| Treatment, before admission, n (%)                                  |                |                                |                                                            |         |
| High-dose steroids(>1mg/kg/day)                                     | 216(30.2)      | 134(45.1)                      | 82(19.6)                                                   | <0.001  |
| Time of steroids use, median (IQR), month                           | 4.0(2.0, 18.0) | 3.0(1.6, 9.0)                  | 6.0(2.0, 24.0)                                             | <0.001  |
| Accumulated dose of glucocorticoids,<br>methylprednisolone, g (IQR) | 38(1.9, 8.8)   | 3.0(1.5, 5.4)                  | 4.8(2.2, 12.5)                                             | <0.001  |
| Antibiotics                                                         | 502(70.1)      | 219(73.7)                      | 283(67.5)                                                  | 0.074   |
| Antiviral drugs                                                     | 113(15.8)      | 44(14.8)                       | 69(16.5)                                                   | 0.550   |
| Treatment, during hospitalization, n (%)                            |                |                                |                                                            |         |
| Anti - Pseudomonas aeruginosa drugs                                 | 547(76.4)      | 220(74.1)                      | 327(78.0)                                                  | 0.218   |
| Voriconazole or caspofungin                                         | 282(39.4)      | 105(35.4)                      | 177(42.2)                                                  | 0.063   |
| Ganciclovir                                                         | 336(46.9)      | 120(40.4)                      | 216(51.6)                                                  | 0.003   |
| Trimethoprim                                                        | 333(46.5)      | 111(37.4)                      | 222(53.0)                                                  | <0.001  |
| Complications, n (%)                                                |                |                                |                                                            |         |
| Noninvasive ventilation                                             | 173(24.2)      | 63(21.2)                       | 110(26.3)                                                  | 0.121   |
| Invasive mechanical ventilation                                     | 172(24.0)      | 70(23.6)                       | 102(24.3)                                                  | 0.811   |
| Mechanical ventilation                                              | 258(36.0)      | 106(35.7)                      | 152(36.3)                                                  | 0.872   |
| Respiratory failure                                                 | 364(50.8)      | 155(52.2)                      | 209(49.9)                                                  | 0.543   |
| ICU admission                                                       | 292(40.8)      | 116(39.1)                      | 176(42.0)                                                  | 0.429   |
| Septic shock during hospitalization                                 | 154(21.5)      | 64(21.5)                       | 90(21.5)                                                   | 0.982   |
| CAP                                                                 | 635(88.7)      | 263(88.6)                      | 372(88.8)                                                  | 0.924   |
| Extracorporeal membrane oxygenation                                 | 36(4.2)        | 15(5.1)                        | 21(5.0)                                                    | 0.981   |
| 30-day mortality                                                    | 162(22.6)      | 66(22.2)                       | 96(22.9)                                                   | 0.828   |
| 90-day mortality                                                    | 186(26.0)      | 76(25.6)                       | 110(26.3)                                                  | 0.842   |

1  
2  
3 \* other immunosuppressants: methotrexate, cyclosporine, cyclophosphamide, tacrolimus, sirolimus, and azathioprine.

4 \*\*Connective tissue disorders: rheumatoid arthritis, systemic lupus erythematosus, dermatomyositis, polymyositis, systemic sclerosis,  
5 Sjogren's syndrome, etc. @ Immunosuppressive drugs: glucocorticoid, tacrolimus, sirolimus, cyclosporine, methotrexate, etc.

6 †Other immunocompromised hosts: eczema, myelitis, autoimmune encephalitis, idiopathic thrombocytopenic purpura, etc.  
7  
8  
9  
10  
11

12 MDR bacteria and CMV were more common in hospital-acquired pneumonia (HAP) than  
13 community-acquired pneumonia (CAP) ( $P<0.05$ ) (Table 2). More pathogens were detected in the  
14 persistent lymphocytopenia group than non-lymphocytopenia group in CAP ( $P<0.05$ ), including  
15 PCP, influenza A virus, CMV and MDR bacteria. Patients on high-dose corticosteroid developed  
16 pneumonia than those in the low-dose corticosteroid group in CAP and HAP, and more frequently  
17 from *Klebsiella pneumoniae*, MDR bacteria, PCP, CMV, and *Mycobacterium tuberculosis* in the  
18 high-dose corticosteroid group than those in the low-dose corticosteroid group in CAP ( $P<0.05$ ).  
19 In the non-survivor group, pathogen positive rate was higher, and MDR bacteria was also more  
20 common than those who survived in CAP and HAP ( $P<0.05$ ) (Table 2-3). For non-CMV viral  
21 pneumonia, respiratory syncytial virus (RSV, 64 strains) was detected most frequently, followed  
22 by influenza A virus (62 strains), human parainfluenza virus (HPIV, 20 strains), influenza B virus  
23 (20 strains), human rhinovirus (HRV, 8 strains), herpes simplex virus type 1 (HSV-1, 4 strains).  
24 and adenovirus (ADV, 9 strains) (Table 2).  
25  
26  
27  
28  
29  
30  
31  
32  
33  
34  
35  
36  
37  
38  
39  
40  
41  
42  
43  
44  
45  
46  
47  
48  
49  
50  
51  
52  
53  
54  
55  
56  
57  
58  
59  
60

1  
2  
3  
4  
5  
6  
7  
8  
9  
10  
11  
12  
13  
14  
15  
16  
17  
18  
19  
20  
21  
22  
23  
24  
25  
26  
27  
28  
29  
30  
31  
32  
33  
34  
35  
36  
37  
38  
39  
40  
41  
42  
43  
44  
45  
46

**Table 2** The pathogen results of glucocorticoid users with community-acquired pneumonia according to different subgroup

For peer review only

1  
2  
3  
4  
5  
6  
7  
8  
9

| Variables, n (%)                     | CAP, N=635 | HAP, N=81  | Simple glucocorticoid users, N=263 | Glucocorticoid with immunosuppressants users, N=372 | Patients discharged alive, N=479 | Patients died during hospitalization, N=156 | Persistent lymphocyte group, N=264 | Non-lymphocytopenia group, N=371 | Patients use high-dose steroids, N=219 | Patients use low-dose steroids, N=416 |
|--------------------------------------|------------|------------|------------------------------------|-----------------------------------------------------|----------------------------------|---------------------------------------------|------------------------------------|----------------------------------|----------------------------------------|---------------------------------------|
| Total pathogenic positive rate       | 438(69.0)  | 62(76.5)   | 190(72.2)                          | 248(66.7)                                           | 321(67.0)                        | 117(75.0)                                   | 190(72.0)                          | 248(66.8)                        | 181(82.6)                              | 257(61.8) #                           |
| Pathogens covered by CAP therapy     | 167(26.3)  | 24(29.6)   | 79(30.3)                           | 88(23.7)                                            | 126(26.3)                        | 41(26.3)                                    | 77(29.2)                           | 90(24.3)                         | 70(32.0)                               | 97(23.3) *                            |
| <i>Streptococcus pneumoniae</i>      | 6(0.9)     | 0(0)       | 2(0.8)                             | 4(1.1)                                              | 6(1.3)                           | 0(0)                                        | 2(0.8)                             | 4(1.1)                           | 1(0.5)                                 | 5(1.2)                                |
| <i>Haemophilus influenzae</i>        | 2(0.3)     | 0(0)       | 1(0.4)                             | 1(0.3)                                              | 2(0.4)                           | 0(0)                                        | 1(0.4)                             | 1(0.3)                           | 2(0.9)                                 | 0(0)                                  |
| <i>Staphylococcus aureus</i>         | 18(2.8)    | 5(6.2)     | 10(3.8)                            | 8(2.2)                                              | 13(2.7)                          | 5(3.2)                                      | 10(3.8)                            | 8(2.2)                           | 7(3.2)                                 | 11(2.6)                               |
| <i>Escherichia coli</i>              | 16(2.5)    | 3(3.7)     | 6(2.3)                             | 10(2.7)                                             | 12(2.5)                          | 4(2.6)                                      | 7(2.7)                             | 9(2.4)                           | 6(2.7)                                 | 10(2.4)                               |
| <i>Enterobacter aerogenes</i>        | 2(0.3)     | 0(0)       | 0(0)                               | 2(0.5)                                              | 1(0.2)                           | 1(0.6)                                      | 1(0.4)                             | 1(0.3)                           | 0(0)                                   | 2(0.5)                                |
| <i>Enterobacter cloacae</i>          | 7(1.1)     | 3(3.7)     | 3(1.1)                             | 4(1.1)                                              | 5(1.0)                           | 2(1.3)                                      | 2(0.8)                             | 5(1.3)                           | 4(1.8)                                 | 3(0.7)                                |
| <i>Klebsiella pneumoniae</i>         | 43(6.8)    | 4(4.9)     | 25(9.5)                            | 18(4.8)                                             | 29(6.1)                          | 14(9.0)                                     | 20(7.6)                            | 23(6.2)                          | 21(9.6)                                | 22(5.3) *                             |
| <i>Pseudomonas</i>                   | 57(9.0)    | 9(11.1)    | 28(10.6)                           | 29(7.8)                                             | 42(8.8)                          | 15(9.6)                                     | 28(10.6)                           | 29(7.8)                          | 24(11.0)                               | 33(7.9)                               |
| <i>Proteus mirabilis</i>             | 3(0.5)     | 0(0)       | 1(0.4)                             | 2(0.5)                                              | 3(0.6)                           | 0(0)                                        | 3(1.1)                             | 0(0)                             | 2(0.9)                                 | 1(0.2)                                |
| <i>Mycoplasma pneumoniae</i>         | 6(0.9)     | 0(0)       | 1(0.4)                             | 5(1.3)                                              | 6(1.3)                           | 0(0)                                        | 1(0.4)                             | 5(1.3)                           | 2(0.9)                                 | 4(1.0)                                |
| <i>Legionella</i>                    | 7(1.1)     | 0(0)       | 2(0.8)                             | 5(1.3)                                              | 7(1.5)                           | 0(0.6)                                      | 2(0.8)                             | 5(1.3)                           | 1(0.5)                                 | 6(1.4)                                |
| Pathogens not covered by CAP therapy | 98(15.4)   | 24(29.6) # | 37(14.1)                           | 61(16.4)                                            | 50(10.4)                         | 48(30.8) #                                  | 47(17.8)                           | 51(13.7)                         | 35(16.0)                               | 63(15.1)                              |
| <i>Acinetobacter</i>                 | 45(7.1)    | 15(18.5) # | 18(6.8)                            | 27(7.3)                                             | 22(4.6)                          | 23(14.7) #                                  | 27(10.2)                           | 18(4.9)                          | 14(6.4)                                | 31(7.5)                               |
| <i>Burkholderia</i>                  | 17(2.7)    | 2(2.5)     | 7(2.7)                             | 10(2.7)                                             | 3(0.6)                           | 14(9.0) #                                   | 6(2.3)                             | 11(3.0)                          | 9(4.1)                                 | 8(1.9)                                |
| <i>Enterococcus</i>                  | 12(1.9)    | 2(2.5)     | 2(0.8)                             | 10(2.7)                                             | 7(1.5)                           | 5(3.2)                                      | 2(0.8)                             | 10(2.7)                          | 3(1.4)                                 | 9(2.2)                                |
| <i>Stenotrophomonas maltophilia</i>  | 13(2.0)    | 2(2.5)     | 5(1.9)                             | 8(2.2)                                              | 10(2.1)                          | 3(1.9)                                      | 7(1.5)                             | 6(1.6)                           | 4(1.8)                                 | 9(2.2)                                |
| <i>Nocardia</i>                      | 8(1.3)     | 0(0)       | 4(1.5)                             | 4(1.1)                                              | 6(1.3)                           | 2(1.3)                                      | 4(1.5)                             | 4(1.1)                           | 4(1.8)                                 | 4(1.0)                                |
| <i>Corynebacterium striatum</i>      | 1(0.2)     | 2(2.5)     | 1(0.4)                             | 0(0)                                                | 1(0.2)                           | 0(0)                                        | 0(0)                               | 1(0.6)                           | 0(0)                                   | 1(0.2)                                |
| <i>Comamonas acidovorans</i>         | 1(0.2)     | 1(1.2)     | 0(0)                               | 1(0.3)                                              | 0(0)                             | 1(0.6)                                      | 1(0.4)                             | 0(0)                             | 1(0.5)                                 | 0(0)                                  |
| <i>Cupriavidus pauculus</i>          | 1(0.2)     | 0(0)       | 0(0)                               | 1(0.3)                                              | 1(0.2)                           | 0(0)                                        | 0(0)                               | 1(0.3)                           | 0(0)                                   | 1(0.2)                                |

39  
40  
41  
42  
43  
44  
45  
46

|    |                                              |            |            |            |            |            |            |            |             |            |             |
|----|----------------------------------------------|------------|------------|------------|------------|------------|------------|------------|-------------|------------|-------------|
| 1  |                                              |            |            |            |            |            |            |            |             |            |             |
| 2  |                                              |            |            |            |            |            |            |            |             |            |             |
| 3  |                                              |            |            |            |            |            |            |            |             |            |             |
| 4  |                                              |            |            |            |            |            |            |            |             |            |             |
| 5  | Multidrug resistance bacteria/ bacteria      | 108(17.0)  | 40(49.4) # | 68(13.3)   | 40(10.8)   | 57(11.9)   | 51(32.7) # | 61(23.1)   | 47(12.7) #  | 51(23.3)   | 57(13.7) #  |
| 6  | Fungus                                       | 212(33.3)  | 34(42.0)   | 80(30.4)   | 132(35.5)  | 141(29.4)  | 71(45.5) # | 109(41.3)  | 103(27.8) # | 105(47.9)  | 107(25.7) # |
| 7  | Pneumocystis                                 | 128(20.2)  | 21(25.9)   | 48(18.3)   | 80(21.5)   | 88(18.4)   | 40(25.6) * | 70(26.5)   | 58(15.6) #  | 71(32.4)   | 57(13.7) #  |
| 8  | Aspergillus                                  | 81(12.8)   | 13(16.0)   | 32(12.2)   | 49(13.2)   | 52(10.9)   | 29(18.6) * | 38(14.4)   | 43(11.6)    | 33(15.1)   | 48(11.5)    |
| 9  | Rhizopus/ Trichoderma                        | 2(0.3)     | 0(0)       | 0(0)       | 2(0.5)     | 0(0)       | 2(1.3)     | 1(0.4)     | 1(0.3)      | 1(0.5)     | 1(0.2)      |
| 10 | Cryptococcus                                 | 1(0.2)     | 0(0)       | 0(0)       | 1(0.3)     | 1(0.2)     | 0(0)       | 0(0)       | 1(0.3)      | 0(0)       | 1(0.2)      |
| 11 |                                              |            |            |            |            |            |            |            |             |            |             |
| 12 | Virus                                        | 355(55.9)  | 51(63.0)   | 154(58.6)  | 201(54.0)  | 257(53.7)  | 98(62.8) * | 167(63.3)  | 188(50.7) # | 132(60.3)  | 223(53.6)   |
| 13 | Cytomegalovirus                              | 186(29.3)  | 33(40.7) * | 79(30.0)   | 107(28.8)  | 133(27.8)  | 53(34.0)   | 93(35.2)   | 93(25.1) #  | 84(38.4)   | 102(24.5) # |
| 14 | Influenza A virus                            | 55(8.7)    | 7(8.6)     | 29(11.0)   | 26(7.0)    | 36(7.5)    | 19(12.2)   | 30(11.4)   | 25(6.7) *   | 15(6.8)    | 40(9.6)     |
| 15 | Influenza B virus                            | 19(3.0)    | 1(1.2)     | 7(2.7)     | 12(3.2)    | 15(3.1)    | 4(2.6)     | 9(3.4)     | 10(2.7)     | 9(4.1)     | 10(2.4)     |
| 16 | Rhinovirus                                   | 8(1.3)     | 0(0)       | 2(0.8)     | 6(1.6)     | 5(1.0)     | 3(1.9)     | 5(1.9)     | 3(0.8)      | 2(0.9)     | 6(1.4)      |
| 17 | Respiratory syncytial virus                  | 56(8.8)    | 8(9.9)     | 27(10.3)   | 29(7.8)    | 45(9.4)    | 11(7.1)    | 18(6.8)    | 38(10.2) *  | 14(6.4)    | 42(10.1)    |
| 18 | Adenovirus                                   | 9(1.4)     | 0(0)       | 4(1.5)     | 5(1.3)     | 8(1.7)     | 1(0.6)     | 2(0.8)     | 7(1.9)      | 2(0.9)     | 7(1.7)      |
| 19 | Parainfluenza virus                          | 18(2.8)    | 2(2.5)     | 5(1.9)     | 13(3.5)    | 12(2.5)    | 6(3.8)     | 6(2.3)     | 12(3.2)     | 4(1.8)     | 14(3.4)     |
| 20 | Herpes simplex virus type 1                  | 4(0.6)     | 0(0)       | 1(0.4)     | 3(0.8)     | 3(0.6)     | 1(0.6)     | 4(1.5)     | 0(0)        | 2(0.9)     | 2(0.5)      |
| 21 | Mycobacterium tuberculosis                   | 12(1.9)    | 0(0)       | 3(1.1)     | 9(2.4)     | 10(2.1)    | 2(1.3)     | 5(1.9)     | 7(1.9)      | 8(3.7)     | 4(1.0) *    |
| 22 | Nontuberculosis mycobacteria                 | 3(0.5)     | 0(0)       | 3(1.1)     | 0(0)       | 1(0.2)     | 2(1.3)     | 3(1.1)     | 0(0)        | 1(0.5)     | 2(0.5)      |
| 23 | Pathogenic types in different groups (Total) | 847(133.4) | 133(164.2) | 356(135.4) | 491(132.0) | 585(122.1) | 262(167.9) | 408(154.5) | 439(118.3)  | 351(160.3) | 496(119.2)  |

#:P<0.01, \*:P<0.05

**Table 3** The pathogen testing result of glucocorticoid users with hospital acquired pneumonia in different subgroup



| Variables, n (%)                        | Patients<br>discharged alive,<br>N=51 | Patients died<br>during<br>hospitalization,<br>N=30 | Persistent<br>lymphocyte<br>nia group,<br>N=40 | Non-<br>lymphocytopenia<br>group, N=41 | Patients use high-<br>dose steroids,<br>N=30 | Patients use low-<br>dose steroids,<br>N=51 |
|-----------------------------------------|---------------------------------------|-----------------------------------------------------|------------------------------------------------|----------------------------------------|----------------------------------------------|---------------------------------------------|
| Total pathogenic positive rate          | 34(66.7)                              | 28(93.3) #                                          | 33(82.5)                                       | 29(70.7)                               | 27(90.0)                                     | 35(68.6) *                                  |
| Bacteria                                | 22(43.1)                              | 26(86.7) #                                          | 23(57.5)                                       | 25(61.0)                               | 21(70.0)                                     | 27(52.9)                                    |
| <i>Staphylococcus aureus</i>            | 2(3.9)                                | 3(10.0)                                             | 2(5.0)                                         | 3(7.3)                                 | 3(10.0)                                      | 2(3.9)                                      |
| <i>Escherichia coli</i>                 | 2(3.9)                                | 1(3.3)                                              | 0(0)                                           | 3(7.3)                                 | 2(6.7)                                       | 1(2.0)                                      |
| <i>Enterobacter cloacae</i>             | 0(0)                                  | 3(10.0) *                                           | 1(2.5)                                         | 2(4.9)                                 | 1(3.3)                                       | 2(3.9)                                      |
| <i>Klebsiella pneumoniae</i>            | 1(2.0)                                | 3(10.0)                                             | 2(5.0)                                         | 2(4.9)                                 | 2(6.7)                                       | 2(3.9)                                      |
| <i>Pseudomonas</i>                      | 3(5.9)                                | 6(20.0)                                             | 5(12.5)                                        | 4(9.8)                                 | 3(10.0)                                      | 6(11.8)                                     |
| <i>Acinetobacter</i>                    | 8(15.7)                               | 7(23.3)                                             | 8(20.0)                                        | 7(17.1)                                | 5(16.7)                                      | 10(19.6)                                    |
| <i>Burkholderia</i>                     | 1(2.0)                                | 1(3.3)                                              | 1(2.5)                                         | 1(2.4)                                 | 1(3.3)                                       | 1(2.0)                                      |
| <i>Enterococcus</i>                     | 2(3.9)                                | 0(0)                                                | 2(5.0)                                         | 0(0)                                   | 1(3.3)                                       | 1(2.0)                                      |
| <i>Stenotrophomonas maltophilia</i>     | 2(3.9)                                | 0(0)                                                | 1(2.5)                                         | 1(2.4)                                 | 2(6.7)                                       | 0(0)                                        |
| <i>Others bacteria</i>                  | 1(2.0)                                | 2(6.7)                                              | 1(2.5)                                         | 2(4.9)                                 | 1(3.3)                                       | 2(3.9)                                      |
| Multidrug resistance bacteria/ bacteria | 11(21.6)                              | 13(43.3) *                                          | 13(32.5)                                       | 11(26.8)                               | 8(26.7)                                      | 16(31.4)                                    |
| Fungus                                  | 21(41.2)                              | 13(43.3)                                            | 21(52.5)                                       | 13(31.7)                               | 14(46.7)                                     | 20(39.2)                                    |
| Pneumocystis                            | 15(29.4)                              | 6(20.0)                                             | 14(35.0)                                       | 7(17.1)                                | 10(33.3)                                     | 11(21.6)                                    |
| Aspergillus                             | 6(11.8)                               | 7(23.3)                                             | 7(17.5)                                        | 6(14.6)                                | 4(13.3)                                      | 9(17.6)                                     |
| Virus                                   | 20(39.2)                              | 31(103.3) #                                         | 25(62.5)                                       | 26(63.4)                               | 20(66.7)                                     | 31(60.8)                                    |
| Cytomegalovirus                         | 16(31.4)                              | 17(56.7) *                                          | 18(45.0)                                       | 15(36.6)                               | 17(56.7)                                     | 16(31.4) *                                  |
| Influenza A virus                       | 1(2.0)                                | 6(20.0) #                                           | 5(12.5)                                        | 2(4.9)                                 | 2(6.7)                                       | 5(9.8)                                      |
| Influenza B virus                       | 0(0)                                  | 1(3.3)                                              | 1(2.5)                                         | 0(0)                                   | 0(0)                                         | 1(2.0)                                      |
| Respiratory syncytial virus             | 1(2.0)                                | 7(23.3) #                                           | 1(2.5)                                         | 7(17.1) *                              | 1(3.3)                                       | 7(13.7)                                     |
| Parainfluenza virus                     | 2(3.9)                                | 0(0)                                                | 0(0)                                           | 2(4.9)                                 | 0(0)                                         | 2(3.9)                                      |

1  
2  
3  
4  
5  
6  
7  
8  
9  
10  
11  
12  
13  
14  
15  
16  
17  
18  
19  
20  
21  
22  
23  
24  
25  
26  
27  
28  
29  
30  
31  
32  
33  
34  
35  
36  
37  
38  
39  
40  
41  
42  
43  
44  
45  
46

---

|                                              |           |           |           |           |           |           |
|----------------------------------------------|-----------|-----------|-----------|-----------|-----------|-----------|
| Pathogenic types in different groups (Total) | 63(123.5) | 70(233.3) | 69(172.5) | 64(156.1) | 55(183.3) | 78(152.9) |
|----------------------------------------------|-----------|-----------|-----------|-----------|-----------|-----------|

---

#:P<0.01, \*:P<0.05

For peer review only

Patients with non-CMV viral pneumonia had higher PaO<sub>2</sub>/FiO<sub>2</sub> ratio and lower number of respiratory failure, and the 30-day and 90-day mortality were lower than those patients with PCP and CMV ( $P < 0.05$ ) (Table 4). There were more PCP and CMV in nephrotic syndrome and chronic glomerulonephritis group, and more *Aspergillus* and non-CMV virus in solid organ transplant group, however, there was no statistical difference in mortality between different underlying diseases (Table 5). Time analysis showed that 58.0% of the patients developed pneumonia within 6 months of starting glucocorticoid therapy and 74.0% of patients developed pneumonia within 1 year (Figure 2). Of the confirmed PCP cases, 79.0% developed the disease within 6 months of starting glucocorticoid therapy and 86.0% within 1 year. Of the confirmed CMV pneumonia cases, 71.0% developed the disease within 6 months of starting glucocorticoid therapy and 82.0% within 1 year (Figure 3). For non-CMV viruses, *Aspergillus*, and bacterial pneumonia, most patients developed the disease within 6 months of starting glucocorticoid therapy, although less than patients with CMV and *Pneumocystis* pneumonia (Figure 2). The trends in the incidence of these types of pneumonia were similar between glucocorticoid with immunosuppressant and glucocorticoid only groups (Figure 3-4).

**Table 4 Comparative analysis of pneumocystis infection group and viral infection group**

| Variables                                        | Pneumocystis infection group, N=134 | Non-CMV viral infection group, N=157 | CMV viral infection group, N=95 | P-Value |
|--------------------------------------------------|-------------------------------------|--------------------------------------|---------------------------------|---------|
| Sex, female, n (%)                               | 65(48.5)                            | 56(35.7)                             | 32(33.7)                        | 0.033   |
| Age, median (IGR)                                | 56.0(45.8, 65.0)                    | 60.0(52.0, 68.0)                     | 64.0(53.0, 71.0)                | <0.001  |
| Nephrotic syndrome or chronic glomerulonephritis | 38(28.4)                            | 10(6.4)                              | 13(13.7)                        | <0.001  |
| Solid organ transplant                           | 7(5.2)                              | 43(27.4)                             | 5(5.3)                          | <0.001  |
| Connective tissue disease                        | 58(44.0)                            | 50(33.1)                             | 43(46.3)                        | 0.051   |
| Interstitial lung disease                        | 49(36.6)                            | 95(60.5)                             | 42(44.2)                        | <0.001  |
| Idiopathic interstitial pneumonia                | 12(9.1)                             | 28(17.8)                             | 14(14.7)                        | 0.091   |
| Laboratory examination                           |                                     |                                      |                                 |         |
| White blood cell, $\times 10^9/L$ (IQR)          | 8.22 (5.50, 11.46)                  | 8.45 (5.94, 11.59)                   | 7.96(5.77, 12.65)               | 0.888   |
| Neutrophils, $\times 10^9/L$ (IQR)               | 7.12(4.66, 10.50)                   | 6.56 (4.47, 9.51)                    | 6.47(4.39, 10.77)               | 0.438   |
| Lymphocyte, $\times 10^9/L$ (IQR)                | 0.60 (0.40, 1.00)                   | 0.99 (0.60, 1.55)                    | 0.91(0.49, 1.57)                | <0.001  |
| Persistent lymphocytopenia                       | 74(55.2)                            | 62(39.5)                             | 39(41.1)                        | 0.017   |
| Oxygenation index                                | 154.4(93.6, 251.4)                  | 295.2(171.3, 403.3)                  | 177.8(102.5, 321.0)             | <0.001  |
| Severe pneumonia index score                     | 75.5(57.0, 105.3)                   | 79.0(61.0, 98.0)                     | 89.0(68.0, 118.0)               | 0.017   |

| Variables                                                           | Pneumocystis<br>infection group,<br>N=134 | Non-CMV viral<br>infection group,<br>N=157 | CMV viral<br>infection group,<br>N=95 | P-Value |
|---------------------------------------------------------------------|-------------------------------------------|--------------------------------------------|---------------------------------------|---------|
| CURB65 score>1                                                      | 39 (29.1)                                 | 46(29.3)                                   | 34(35.8)                              | 0.512   |
| Imaging features, n (%), 35missing                                  |                                           |                                            |                                       |         |
| Consolidation or mass                                               | 57(42.5)                                  | 66(42.0)                                   | 41(43.2)                              | 0.547   |
| Ground-glass opacity                                                | 102(76.1)                                 | 83(52.9)                                   | 51(53.7)                              | <0.001  |
| Treatment, before admission, n (%)                                  |                                           |                                            |                                       |         |
| High-dose steroids(>30mg/day)                                       | 73(54.5)                                  | 39(24.8)                                   | 41(43.2)                              | <0.001  |
| Accumulated dose of glucocorticoids,<br>methylprednisolone, g (IQR) | 3.3(2.2, 5.8)                             | 2.9(1.2, 6.8)                              | 4.0(2.1, 7.4)                         | 0.186   |
| Time of steroids use (month)                                        | 3.0(2.0, 5.0)                             | 5.0(2.0, 16.0)                             | 4.0(2.0, 12.0)                        | 0.291   |
| Receiving other immunosuppressants                                  | 58(43.3)                                  | 67(42.7)                                   | 45(47.4)                              | 0.749   |
| Complications, n (%)                                                |                                           |                                            |                                       |         |
| Noninvasive ventilation                                             | 51(38.1)                                  | 29(18.5)                                   | 29(30.5)                              | 0.001   |
| Invasive mechanical ventilation                                     | 41(30.6)                                  | 43(27.4)                                   | 27(28.4)                              | 0.831   |
| Respiratory failure                                                 | 104(77.6)                                 | 69(43.9)                                   | 55(57.9)                              | <0.001  |
| ICU care                                                            | 84(62.7)                                  | 52(33.1)                                   | 49(51.6)                              | <0.001  |
| Septic shock                                                        | 38(28.4)                                  | 40(25.5)                                   | 22(23.2)                              | 0.667   |
| Extracorporeal membrane oxygenation                                 | 6(4.5)                                    | 17(10.8)                                   | 6(6.3)                                | 0.108   |
| 30-day mortality                                                    | 45(33.6)                                  | 32(20.4)                                   | 23(24.2)                              | 0.034   |
| 90-day mortality                                                    | 51(38.1)                                  | 38(24.2)                                   | 26(27.4)                              | 0.030   |

Non-CMV virus: respiratory syncytial virus (RSV), influenza A virus, influenza B virus, human parainfluenza virus (HPIV), human rhinovirus (HRV), and adenovirus.

**Table 5** Clinical characteristics of pneumonia with glucocorticoid users in different underlying disease

| Variables                               | Connective tissue disease, N=368 | Nephrotic syndrome or chronic glomerulonephritis, N=90 | Solid organ transplant, N=63 | Bone marrow or HSCT, N=7 | Lymphoma, N=17    | Bronchial asthma or COPD, N=30 | Idiopathic interstitial pneumonia, N=73 | Radiation pneumonitis, N=8 | <i>P</i> value |
|-----------------------------------------|----------------------------------|--------------------------------------------------------|------------------------------|--------------------------|-------------------|--------------------------------|-----------------------------------------|----------------------------|----------------|
| Sex, female, n (%)                      | 228(62.0)                        | 28(31.1)                                               | 15(23.8)                     | 1(14.3)                  | 4(23.5)           | 9(30.0)                        | 28(38.4)                                | 0(0)                       | <0.001         |
| Age, median (IQR)                       | 60.0(47.3,69.8)                  | 57.0(41.8, 66.0)                                       | 56.0(46.0, 63.0)             | 33.0(32.0, 53.0)         | 65.0(53.5, 75.0)  | 62.0(57.0, 73.3)               | 65.0(55.0,71.0)                         | 62.5(52.0, 66.8)           | <0.001         |
| Laboratory examination                  |                                  |                                                        |                              |                          |                   |                                |                                         |                            |                |
| White blood cell, $\times 10^9/L$ (IQR) | 7.79 (5.72, 11.19)               | 8.31 (6.47, 11.81)                                     | 6.92(4.45, 9.93)             | 5.27(3.80, 11.6)         | 5.16(2.85, 9.23)  | 9.42(6.59, 12.82)              | 9.58(7.15, 12.91)                       | 6.95(5.52, 10.82)          | 0.001          |
| Neutrophils, $\times 10^9/L$ (IQR)      | 6.36(4.29, 9.80)                 | 7.48 (5.30, 10.81)                                     | 4.80(3.2, 7.7)               | 3.85(0.90, 7.05)         | 3.52(1.89, 7.91)  | 6.94(4.45, 9.13)               | 8.13(4.87, 11.07)                       | 6.16(5.20, 9.50)           | <0.001         |
| Lymphocyte, $\times 10^9/L$ (IQR)       | 0.83 (0.50, 1.34)                | 0.77 (0.40, 1.22)                                      | 0.80(0.33, 1.31)             | 0.61(0.43, 2.07)         | 0.86(0.38, 1.42)  | 1.15(0.76, 1.73)               | 1.10(0.70, 1.61)                        | 0.50(0.09, 0.94)           | 0.014          |
| Persistent lymphocytopenia              | 160(43.5)                        | 39(43.3)                                               | 29(46.0)                     | 3(42.9)                  | 8(47.1)           | 8(26.7)                        | 29(39.7)                                | 5                          | 0.634          |
| Oxygenation index                       | 243.1(126.6, 343.8)              | 176.5(103.4, 279.0)                                    | 323.8(207.1, 424.5)          | 265.5(148.8, 304.7)      | 197.8(80.0,350.7) | 264.6(181.6, 444.0)            | 242.9(128.0, 364.3)                     | 307.4(244.1, 442.0)        | 0.001          |
| Severe pneumonia index score            | 73.0(54.0,96.0)                  | 88.0(67.8, 113.5)                                      | 83.0(64.0, 100.0)            | 64.0(42.0, 86.0)         | 96.0(73.5, 141.5) | 74.5(60.8, 92.5)               | 75.0(63.0, 96.5)                        | 91.5(85.0, 131.0)          | <0.001         |
| CURB65 score>1                          | 105 (28.5)                       | 34(37.8)                                               | 15(23.8)                     | 1(14.3)                  | 4(23.5)           | 6(20.0)                        | 25(34.2)                                | 2(25.0)                    | 0.391          |
| Imaging features, n (%)                 |                                  |                                                        |                              |                          |                   |                                |                                         |                            |                |
| Consolidation or mass                   | 163(51.6)                        | 41(55.4)                                               | 23(37.7)                     | 3(60.0)                  | 5(38.5)           | 7(23.3)                        | 19(28.4)                                | 5(83.3)                    | 0.005          |
| Ground-glass opacity                    | 203(64.2)                        | 50(67.6)                                               | 29(47.5)                     | 2(40.0)                  | 8(61.5)           | 16(53.3)                       | 51(76.1)                                | 4(66.7)                    | 0.04           |
| Total pathogenic positive rate          |                                  |                                                        |                              |                          |                   |                                |                                         |                            |                |
| Bacteria                                | 104(28.3)                        | 29(32.2)                                               | 31(49.2)                     | 2(28.6)                  | 2(11.8)           | 11(36.7)                       | 18(24.7)                                | 4(50.0)                    | 0.015          |
| PCP                                     | 63(17.1)                         | 40(44.4)                                               | 10(15.9)                     | 0(0)                     | 4(23.5)           | 3(10.0)                        | 12(16.4)                                | 3(37.5)                    | <0.001         |
| Aspergillus                             | 33(9.0)                          | 9(10.0)                                                | 26(41.3)                     | 0(0)                     | 1(5.9)            | 5(16.7)                        | 10(13.7)                                | 2(25.0)                    | <0.001         |
| CMV                                     | 85(23.1)                         | 41(45.6)                                               | 15(23.8)                     | 3(42.9)                  | 8(47.1)           | 4(13.3)                        | 26(35.6)                                | 5(62.5)                    | <0.001         |
| Non-CMV virus                           | 56(15.2)                         | 12(13.3)                                               | 47(74.6)                     | 2(28.6)                  | 4(23.5)           | 3(10.0)                        | 28(38.4)                                | 1(12.5)                    | <0.001         |

| Variables                                                        | Connective tissue disease, N=368 | Nephrotic syndrome or chronic glomerulonephritis, N=90 | Solid organ transplant, N=63 | Bone marrow or HSCT, N=7 | Lymphoma, N=17 | Bronchial asthma or COPD, N=30 | Idiopathic interstitial pneumonia, N=73 | Radiation pneumonitis, N=8 | <i>P</i> value |
|------------------------------------------------------------------|----------------------------------|--------------------------------------------------------|------------------------------|--------------------------|----------------|--------------------------------|-----------------------------------------|----------------------------|----------------|
| Treatment, before admission, n (%)                               |                                  |                                                        |                              |                          |                |                                |                                         |                            |                |
| High-dose steroids use                                           | 140(38.0)                        | 32(35.6)                                               | 3(4.8)                       | 1(14.3)                  | 9(52.9)        | 7(23.3)                        | 27(37.0)                                | 3(37.5)                    | <0.001         |
| Accumulated dose of glucocorticoids, methylprednisolone, g (IQR) | 5.4(2.4, 13.7)                   | 3.8(2.5, 6.6)                                          | 1.9(0.9, 3.3)                | 1.3(0.6, 7.3)            | 2.9(2.4, 36)   | 0.6(0.3, 2.4)                  | 3.6(2.0, 6.5)                           | 5.9(3.1, 6.7)              | <0.001         |
| Time of steroids use (month)                                     | 5.9(2.0, 29.8)                   | 3.0(3.0, 11.0)                                         | 7.0(2.0, 15.0)               | 6.0(3.0, 18.0)           | 3.5(2.0, 5.0)  | 1.0(1.0, 13.5)                 | 3.5(2.0, 12.0)                          | 3.0(2.0, 8.0)              | 0.024          |
| Receiving other immunosuppressants                               | 257(69.8)                        | 48(53.3)                                               | 63(100.0)                    | 6                        | 9(52.9)        | 0(0)                           | 17(23.3)                                | 1(12.5)                    | <0.001         |
| Complications, n (%)                                             |                                  |                                                        |                              |                          |                |                                |                                         |                            |                |
| Noninvasive ventilation                                          | 98(26.6)                         | 25(27.8)                                               | 8(12.7)                      | 1(14.3)                  | 4(23.5)        | 3(10.0)                        | 19(26.0)                                | 2(25.0)                    | 0.183          |
| Invasive mechanical ventilation                                  | 89(24.2)                         | 25(27.8)                                               | 10(15.9)                     | 1(14.3)                  | 4(23.5)        | 6(20.0)                        | 24(32.9)                                | 0(0)                       | 0.237          |
| Respiratory failure                                              | 179(48.6)                        | 58(64.4)                                               | 24(38.1)                     | 3(42.9)                  | 6(35.3)        | 14(46.7)                       | 41(56.2)                                | 3(37.5)                    | 0.040          |
| ICU care                                                         | 152(41.3)                        | 49(54.4)                                               | 14(22.2)                     | 3(42.9)                  | 6(35.3)        | 6(20.0)                        | 35(47.9)                                | 1(12.5)                    | 0.001          |
| Septic shock                                                     | 68(18.5)                         | 25(27.8)                                               | 15(23.8)                     | 2(28.6)                  | 4(23.5)        | 5(16.7)                        | 20(27.4)                                | 2(25.0)                    | 0.481          |
| Extracorporeal membrane oxygenation                              | 15(4.1)                          | 4(4.4)                                                 | 4(6.3)                       | 0(0)                     | 1(5.9)         | 0(0)                           | 10(13.7)                                | 0(0)                       | 0.044          |
| 30-day mortality                                                 | 88(23.9)                         | 23(25.6)                                               | 8(12.7)                      | 2(28.6)                  | 3(17.6)        | 4(13.3)                        | 17(23.3)                                | 2(25.0)                    | 0.509          |
| 90-day mortality                                                 | 103(28.0)                        | 25(27.8)                                               | 9(14.3)                      | 2(28.6)                  | 4(23.5)        | 6(20.0)                        | 20(27.4)                                | 2(25.0)                    | 0.528          |

HSCT: hematopoietic stem cell transplant; COPD: chronic obstructive pulmonary disease

Cox regression analysis indicated that the following factors were independent predictors of 30-day and 90-day mortality in both glucocorticoid with immunosuppressant and glucocorticoid only groups with CAP: septic shock, respiratory failure, and persistent lymphocytopenia. In the glucocorticoid-only group, high-dose corticosteroid and invasive mechanical ventilation were independent negative predictors of 90-day mortality (Table 6). Interstitial lung disease and mechanical ventilation were independent negative predictors of 90-day mortality in the glucocorticoid and immunosuppressants group (Table 7).

**Table 6** Cox regression analysis of prognostic factors in glucocorticoid users with community acquired pneumonia

| <i>Variables</i>                | patients         |              |                |                  |              |                |
|---------------------------------|------------------|--------------|----------------|------------------|--------------|----------------|
|                                 | 30-day mortality |              |                | 90-day mortality |              |                |
|                                 | OR               | 95%CI        | <i>P</i> value | OR               | 95%CI        | <i>P</i> value |
| Septic shock                    | 5.874            | 3.210-10.750 | <0.001         | 4.900            | 2.685-8.941  | <0.001         |
| Respiratory failure             | 8.625            | 2.580-28.832 | <0.001         | 8.757            | 2.554-30.024 | 0.001          |
| Persistent lymphocytopenia      | 2.069            | 1.183-3.621  | 0.011          | 1.757            | 1.049-2.941  | 0.032          |
| Invasive mechanical ventilation | -                | -            | -              | 2.240            | 1.251-4.010  | 0.007          |
| High-dose steroids              | 1.989            | 1.145-3.456  | 0.015          | -                | -            | -              |

**Table 7** Cox regression analysis of prognostic factors in glucocorticoid and immunosuppressants users with community acquired pneumonia patients

| <i>Variables</i>           | community acquired pneumonia patients |               |                |                  |               |                |
|----------------------------|---------------------------------------|---------------|----------------|------------------|---------------|----------------|
|                            | 30-day mortality                      |               |                | 90-day mortality |               |                |
|                            | OR                                    | 95%CI         | <i>P</i> value | OR               | 95%CI         | <i>P</i> value |
| Septic shock               | 4.438                                 | 2.783-7.077   | <0.001         | 4.030            | 2.549-6.370   | <0.001         |
| Interstitial lung disease  | -                                     | -             | -              | 1.678            | 1.099-2.562   | 0.017          |
| Respiratory failure        | 48.238                                | 6.568-354.301 | <0.001         | 35.106           | 4.560-270.244 | 0.001          |
| Persistent lymphocytopenia | 1.714                                 | 1.046-2.810   | 0.033          | 1.648            | 1.047-2.594   | 0.031          |
| Mechanical ventilation     |                                       |               |                | 1.949            | 1.031-3.685   | 0.040          |

## DISCUSSION

This study was the first large-scale retrospective investigation of the etiology and the prognostic risk factors of pneumonia in patients with glucocorticoid use. The main findings of the present study are summarized as follows: (1) more than 60% of the patients developed pneumonia within 6 months of glucocorticoid therapy initiation, especially those with PCP and CMV pneumonia; (2) persistent lymphocytopenia was associated with significantly higher rates of infection by opportunistic pathogens, mixed pathogen types, and MDR bacteria; (3) patients using high-dose glucocorticoids were significantly more likely to develop opportunistic pneumonia than those using low-dose glucocorticoids; (4) the 30-day and 90-day mortality of non-CMV and CMV viral pneumonia were similar, but lower than PCP; (5) septic shock, respiratory failure, mechanical ventilation, interstitial lung disease, and persistent lymphocytopenia were independent predictors of 90-day mortality in GP.

The use of glucocorticoid and other immunosuppressive agents are risk factors for the development of CMV, *Pneumocystis*, *Aspergillus*, and other opportunistic infections.<sup>18-23</sup> A review of 33 pneumonia patients with long-term glucocorticoid use showed that *Staphylococcus aureus* was the most common pathogen, with a wide range of other causative pathogens including bacteria, fungi, viruses, *Pneumocystis*, and *Mycobacterium*.<sup>1</sup> In an international multicenter study of immunocompromised patients, with chronic steroid users accounted for 45% of the patients,<sup>24</sup> which found the main causative pathogens for pneumonia were *Streptococcus pneumoniae*, *Pseudomonas aeruginosa*, *Klebsiella pneumoniae*, *Staphylococcus aureus*, influenza viruses, and PCP. In our study, the most common isolated pathogen types were bacterial, CMV, non-CMV viruses, PCP, *Aspergillus* or *Cryptococcus*, *Mycoplasma pneumoniae* or *Legionella*, and *Mycobacterium tuberculosis* or *Nontuberculosis mycobacteria*. For bacterial infections, *Pseudomonas aeruginosa*, *Acinetobacter baumannii*, *Klebsiella pneumoniae*, and *Staphylococcus aureus* were most common possibly due to antibiotic therapy before admission. In some patients, the timing of the BAL or sputum sampling was more than 48 hours after admission, which might increase the nosocomial etiology such as *Acinetobacter baumannii*.

The associations between mixed pulmonary infections and treatment with glucocorticoids for nephrotic syndrome, lung transplantation, and other disorders requiring immunosuppression



1  
2  
3  
4 have reported.<sup>25-27</sup> We found mixed infections in more than 50% of the patients. The  
5  
6 glucocorticoid use may also be a risk factor for MDR bacterial infection. We demonstrated that  
7  
8 the MDR bacterial infection was significantly higher in the high-dose steroid and the persistent  
9  
10 lymphocytopenia subgroups. When treating pneumonia in patients with high-dose steroids or  
11  
12 those with persistent lymphocytopenia, MDR pathogens must be considered when selecting  
13  
14 antimicrobial agents. A low CD4<sup>+</sup> T-lymphocyte count is known to associate with PCP  
15  
16 infection.<sup>30 31</sup> Moreover, low absolute lymphocyte count and prolonged high-dose steroid therapy  
17  
18 are predictors of PCP and CMV infections.<sup>32-39</sup> Yang demonstrated that the average time until the  
19  
20 diagnosis of PCP was only 2.4 months after immunosuppressant initiation in glomerulonephritis  
21  
22 patients.<sup>40</sup> Our results resonate with the importance of considering PCP infection in patients  
23  
24 receiving chronic, high-dose glucocorticoid. This study also indicates that high-dose  
25  
26 glucocorticoid use is associated with *Mycobacterium tuberculosis* and *Aspergillus* pneumonia. It  
27  
28 has been shown that glucocorticoids have profound effects on the distributions and functions of  
29  
30 immune cells, including decreasing macrophage antifungal activity through inhibiting reactive  
31  
32 oxidant intermediates and directly stimulating the growth of *Aspergillus fumigatus*.<sup>41</sup>

33  
34 Respiratory viruses have also been recognized as a potential cause of pneumonia and death in  
35  
36 immunocompromised individuals with hematopoietic stem cell transplants or hematologic  
37  
38 malignancies. Jacobs found a 25% overall 30-day mortality in 32 patients with hematologic  
39  
40 malignancies with human rhinovirus lower respiratory tract infection.<sup>42</sup> Slightly higher mortality  
41  
42 (27%) was observed by Dimpy in patients with lower respiratory tract infections caused by  
43  
44 parainfluenza virus in hematopoietic cell transplant recipients and hematologic  
45  
46 malignancy patients.<sup>43</sup> Chatzis showed that 21.3% of an immunocompromised adult cohort with  
47  
48 RSV pneumonia required ICU transfer with nearly 20% mortality.<sup>44</sup> Crotty conducted an  
49  
50 observational cohort study of 284 patients with viral pneumonia, in which the majority (51.8%)  
51  
52 were immunocompromised and the overall in-hospital mortality was high (23.2%).<sup>45</sup> In our study,  
53  
54 the 90-day mortality was 24.2% in non-CMV viral pneumonia which was similar to CMV (27.4%)  
55  
56 but lower than PCP (38.1%,  $P<0.05$ ). Therefore, it is important to include in viral etiology in the  
57  
58 differential diagnosis in pneumonia of those on corticosteroid. The presence of ground-glass  
59  
60 lesions on CT imaging should prompt the consideration of PCP and viral infections. Viral nucleic  
acid and PCP testing should be obtained, and targeted antimicrobial treatment should be started as

1  
2  
3  
4 early as possible.

5 Overall mortality from pulmonary infections in patients receiving long-term glucocorticoid  
6 therapy can be as high as 45%,<sup>1</sup> with a similar rate in patients with other causes of  
7 immunosuppression.<sup>21</sup> Respiratory failure and the need for mechanical ventilation have been  
8 shown to be the strongest predictors of mortality in immunocompromised patients with or without  
9 pneumonia.<sup>46,47</sup> Lymphocytopenia is also significantly associated with increased mortality in  
10 non-HIV-infected patients with PCP or viral pneumonia.<sup>32,48</sup> Vial-Dupuy indicated high-dose  
11 steroids during ICU stay (OR=0.19; [95% CI, 0.04-0.99]) were independent determinants of in-  
12 hospital mortality in patients with interstitial lung disease admitted to the ICU<sup>49</sup>. Kotani's study  
13 indicated interstitial lung disease was a risk factor associated with the mortality of *Pneumocystis*  
14 *jirovecii* pneumonia (PCP) who required mechanical ventilation.<sup>50</sup> Our research pointed out that  
15 patients on high-dose glucocorticoid, persistent lymphocytopenia, and interstitial lung disease may  
16 convey a poor prognosis.

17  
18  
19  
20  
21  
22  
23  
24  
25  
26  
27  
28  
29 There are several limitations to this study. First, it had a retrospective design. Second, not all  
30 patients with pneumonia underwent a full array of pathogen testing, thus the pathogen  
31 identification and diagnosis might be incomplete. Third, some pathogens were not identified until  
32 at least 48 hours after admission, which increases the possibility of nosocomial infections. Despite  
33 these limitations, our results are consistent with the existing literature and provide more detailed  
34 insights into the clinical characteristics, pathogenic etiologies, and prognostic factors that should  
35 be carefully considered when managing patients on glucocorticoid therapy.

## 36 37 38 39 40 41 42 43 44 45 **CONCLUSIONS**

46 Patients receiving glucocorticoid therapy with pneumonia experience higher rates of infection  
47 with opportunistic pathogens, significant morbidity, and high mortality, especially with specific  
48 risk factors. This information should be carefully considered when determining treatment  
49 strategies for this patient population.

50  
51  
52  
53  
54 **Funding:** This work was supported by the Ministry of Science and Technology Support Program  
55 (Grant: 2015BAI12B11) and the Beijing Science and Technology Commission Key Project  
56 (Grant: D151100002115004)

57  
58  
59  
60 **Contributors:** Study design: LL, BC. Data collection: LL, JS, LS, GS, LS, LZ, CW, YR, JW,

1  
2  
3  
4 JP, JL. Statistical analysis: LL, SH.H. GX. Writing: LL, BC, SH.H. All authors take full  
5 responsibility for the study design, data analysis and interpretation, and preparation of the  
6 manuscript. All authors approved the final draft manuscript.  
7  
8

9  
10 **Competing interests:** None declared by all authors.

11 **Ethics approval:** The Ethics Committee of China-Japan Friendship Hospital (no.2015-86)  
12 through centralized collaboration and approval with all participating institutions.  
13  
14

15 **Patient consent:** A consent was obtained from all patients. A waiver of consent was granted by  
16 the Ethic Committee of China-Japan Friendship Hospita in collaboration with all participating  
17 institutions to submit and collect anonymized data.  
18  
19

20 **Provenance and peer review:** Not commissioned; externally peer reviewed.  
21  
22

23 **Data sharing statement:** No additional data are available.  
24  
25  
26

## 27 REFERENCES:

- 28 1. Agustí C, Rañó A, Filella X, et al. Pulmonary infiltrates in patients receiving long-term glucocorticoid  
29 Treatment-Etiology, prognostic factors, and associated inflammatory response. *Chest* 2003; 123(2): 488-498.
- 30 2. Ajmal S, Mahmood M, Saleh O A, et al. Invasive fungal infections associated with prior respiratory viral  
31 infections in immunocompromised hosts. *Infection* 2018;46(4):555-558.
- 32 3. Fillâtre P, Revest M, Belaz S, et al. Pneumocystosis in non-HIV-infected immunocompromised patients. *Rev*  
33 *Med Interne* 2016;37(5):327-336.
- 34 4. Kofteridis DP, Aalachis A, Velegraki M, et al. Predisposing factors, clinical characteristics and outcome of  
35 Pneumocystis jirovecii pneumonia in HIV-negative patients. *J Infect Chemother* 2014; 20(7):412-416.
- 36 5. American Thoracic Society, Infectious Diseases Society of America. Guidelines for the management of adults  
37 with hospital-acquired, ventilator-associated, and healthcare-associated pneumonia. *Am J Respir Crit Care Med*  
38 2015;171(40):388-416.
- 39 6. Sousa D, Justo I, Domínguez A, et al. Community-acquired pneumonia in immunocompromised older patients:  
40 incidence, causative organisms and outcome. *Clin Microbiol Infect* 2013;19(2):187-192.
- 41 7. Jouneau S, Poineuf JS, Minjolle S, et al. Which patients should be tested for viruses on bronchoalveolar lavage  
42 fluid? *Eur J Clin Microbiol Infect Dis* 2013;32(5):671-677.
- 43 8. Denise Rossato Silva et al. Clinical characteristics and evolution of non-HIV-infected immunocompromised  
44 patients with an in-hospital diagnosis of tuberculosis. *J Bras Pneumol* 2010;36(4):475-484.
- 45 9. Diamantis P. Kofteridis et al. Predisposing factors, clinical characteristics and outcome of Pneumocystis  
46 jirovecii pneumonia in HIV-negative patients. *J Infect Chemother* 2014; 20:412-416.
- 47 10. Marti C, Garin N, Grosgrun O, et al. Prediction of severe community-acquired pneumonia: a systematic  
48 review and meta-analysis. *Crit Care* 2012; 16(4): R141.
- 49 11. Kwok C S, Loke Y K, Woo K, et al. Risk prediction models for mortality in community-acquired pneumonia:  
50 a systematic review. *Biomed Res Int* 2013;2013(10): 504136. DOI: 10.1155/2013/504136.
- 51 12. Furtado G H, Wiskirchen D E, Kuti J L, et al. Performance of the PIRO score for predicting mortality in  
52 patients with ventilator-associated pneumonia. *Anaesth Intensive Care* 2012; 40(2):285-291.  
53  
54  
55  
56  
57  
58  
59  
60

13. Aliberti S, Cilloniz C, Chalmers J D, et al. Multidrug-resistant pathogens in hospitalized patients coming from the community with pneumonia: a European perspective. *Thorax* 2013;68(11):997-999.
14. Magiorakos A P, Srinivasan A, Carey R B, et al. Multidrug-resistant, extensively drug-resistant and pan drug-resistant bacteria: an international expert proposal for interim standard definitions for acquired resistance. *Clin Microbiol Infect* 2012; 18(3):268-281.
15. Schauwvlieghe A F A D, Rijnders B J A, Nele P, et al. Invasive aspergillosis in patients admitted to the intensive care unit with severe influenza: a retrospective cohort study. *Lancet Respir Med* 2018;6(10):782-792.
16. Patterson TF, Thompson GR 3rd, Denning DW. Practice Guidelines for the Diagnosis and Management of Aspergillosis: 2016 Update by the Infectious Diseases Society of America. *Clin Infect Dis* 2016; 63(4): e1-e60.
17. Guo F, Chen Y, Yang S L, et al. Pneumocystis Pneumonia in HIV-Infected and Immunocompromised Non-HIV Infected Patients: A Retrospective Study of Two Centers in China. *Plos One* 2014; 9(7): e101943.
18. Kim T, Park SY, Lee HJ, et al. Assessment of cytomegalovirus and cell-mediated immunity for predicting outcomes in non-HIV-infected patients with Pneumocystis jirovecii pneumonia. *Medicine (Baltimore)* 2017; 96(30): e7243.
19. Brownback KR, Pitts LR, Simpson SQ. Utility of galactomannan antigen detection in bronchoalveolar lavage fluid in immunocompromised patients. *Mycoses* 2013; 56(5):552-558.
20. Ajmal S, Mahmood M, Saleh O A, et al. Invasive fungal infections associated with prior respiratory viral infections in immunocompromised hosts. *Infection* 2018;46(4):55-558.
21. Rañó A, Agustí C, Jimenez P, et al. Pulmonary infiltrates in non-HIV immunocompromised patients: a diagnostic approach using non-invasive and bronchoscopic procedures. *Thorax* 2001; 56(5):379-387.
22. Jolis R, Castella J, Puzo C, et al. Diagnostic value of protected BAL in diagnosing pulmonary infections in immunocompromised patients. *Chest* 1996;109(3):601-607.
23. Eyüboğlu FÖ, Küpeli E, Bozbaş SS, et al. Evaluation of pulmonary infections in solid organ transplant patients: 12 years of experience. *Transplant Proc* 2013; 45(10):3458-3461.
24. Di Pasquale MF, Sotgiu G, Gramegna A. Prevalence and Etiology of Community-acquired Pneumonia in Immunocompromised Patients. *Clin Infect Dis* 2019 Apr 24;68(9):1482-1493.
25. Popova V V, Shilov E M, Kornev B M, et al. Development of mixed infection in patient with nephrotic syndrome on immunosuppressive therapy. *Ter Arkh* 1998;70(6):56-7.
26. Qureshi S, Pandey A, Sirohi T R, et al. Mixed pulmonary infection in an immunocompromised patient: a rare case report. *Indian J Med Microbiol* 2014;32(1):79-81.
27. Hamadani M, Jr B D, Blum W, et al. Pulmonary Nocardia and Aspergillus co-infection in a patient with chronic graft-versus-host disease. *Transpl Infect Dis* 2010, 10(1):24-26.
28. Montero M, Sala M, Riu M, et al. Risk factors for multidrug-resistant *Pseudomonas aeruginosa* acquisition. Impact of antibiotic use in a double case-control study. *Eur J Clin Microbiol Infect Dis* 2010, 29(3) :335-339.
29. Parker CM, Kutsogiannis J, Muscedere J, et al. Ventilator-associated pneumonia caused by multidrug-resistant organisms or *Pseudomonas aeruginosa*: prevalence, incidence, risk factors, and outcomes. *J Crit Care* 2008; 23(1): 18-26.
30. Rouyer M, Stoelin A, Blanc FX. Pneumocystis pneumonia in HIV-negative adults. *Rev Mal Respir* 2015;32(10):985-90.
31. Williams KM, Ahn KW, Chen M, et al. The incidence, mortality and timing of Pneumocystis jirovecii pneumonia after hematopoietic cell transplantation: a CIBMTR analysis. *Bone Marrow Transplant* 2016;51(4):573-80.
32. Chia-Jung Liu, Tai-Fen Lee, Sheng-Yuan Ruan, et al. Clinical characteristics, treatment outcomes, and prognostic factors of Pneumocystis pneumonia in non-HIV-infected patients. *Infect Drug Resist* 2019; 12: 1457-

- 1  
2  
3 1467.  
4  
5 33.Nierenberg NE, Poutsiaika DD, Chow JK. Pretransplant lymphopenia is a novel prognostic factor in  
6 cytomegalovirus and non-cytomegalovirus invasive infections after liver transplantation. *Liver*  
7 *Transpl* 2014;20(12):1497-507.  
8  
9 34.Werbel WA, Ison MG, Angarone MP,et al. Lymphopenia is associated with late onset *Pneumocystis jirovecii*  
10 pneumonia in solid organ transplantation. *Transpl Infect Dis* 2018;20(3): e12876.  
11  
12 35.Tadros S, Teichtahl AJ, Ciciriello S,et al. *Pneumocystis jirovecii* pneumonia in systemic autoimmune rheumatic  
13 disease: A case-control study. *Semin Arthritis Rheum* 2017;46(6):804-809.  
14  
15 36.Lee EH, Kim EY, Lee SH. Risk factors and clinical characteristics of *Pneumocystis jirovecii* pneumonia in lung  
16 cancer. *Sci Rep* 2019 ;9(1):2094.  
17  
18 37.Lemiale V, Debrumetz A, Delannoy A, Alberti C, Azoulay E. Adjunctive steroid in HIV-negative patients with  
19 severe *Pneumocystis pneumonia*. *Respir Res* 2013; 14:87.  
20  
21 38.Tong J, Sun Z, Liu H.Risk factors of CMV infection in patients after umbilical cord blood transplantation: a  
22 multicenter study in China. *Chin J Cancer Res* 2013;25(6):695-703.  
23  
24 39.Park JW, Curtis JR, Kim MJ,et al. *Pneumocystis pneumonia* in patients with rheumatic diseases receiving  
25 prolonged, non-high-dose steroids-clinical implication of primary prophylaxis using trimethoprim-  
26 sulfamethoxazole. *Arthritis Res Ther* 2019;21(1):207.  
27  
28 40.Yang CY, Yang AH, Yang WC,et al. Risk factors for *Pneumocystis jirovecii* pneumonia in glomerulonephritis  
29 patients receiving immunosuppressants. *Intern Med* 2012;51(20):2869-75.  
30  
31 41. Philippe, B, Ibrahim-Granet, O, Prevost, M.C. et al. Killing of *Aspergillus fumigatus* by alveolar macrophages  
32 is mediated by reactive oxidant intermediates. *Infect Immun* 2003;71(6):3034-42.  
33  
34 42.Jacobs SE, Lamson DM, Soave R,et al. Clinical and molecular epidemiology of human rhinovirus infections in  
35 patients with hematologic malignancy. *J Clin Virol* 2015; 71:51-8.  
36  
37 43.Shah DP, Shah PK, Azzi JM,et al. Parainfluenza virus infections in hematopoietic cell  
38 transplant recipients and hematologic malignancy patients: A systematic review. *Cancer Lett* 2016;370(2):358-64.  
39  
40 44.Chatzis O, Darbre S, Pasquier J .Burden of severe RSV disease among immunocompromised children and  
41 adults: a 10 year retrospective study. *BMC Infect Dis* 2018;18(1):111.  
42  
43 45.Crotty MP, Meyers S, Hampton N,et al. Epidemiology, Co-Infections, and Outcomes of Viral  
44 Pneumonia in Adults: An Observational Cohort Study. *Medicine (Baltimore)* 2015;94(50): e2332.  
45  
46 46. Rañó A, Agustí C, Benito N, et al. Prognostic factors of non-HIV immunocompromised patients with  
47 pulmonary infiltrates. *Chest* 2002,122(1):253-261.  
48  
49 47.Azoulay E, Pickkers P, Soares M .Acute hypoxemic respiratory failure in immunocompromised patients:  
50 the Efraim multinational prospective cohort study. *Intensive Care Med* 2017;43(12):1808-1819.  
51  
52 48. Shi SJ, Li H, Liu M ,et al. (2017). Mortality prediction to hospitalized patients with influenza pneumonia: PO2  
53 /FiO2 combined lymphocyte count is the answer. *Clin Respir J* 2017;11(3):352-360.  
54  
55 49.Vial-Dupuy A, Sanchez O, Douvry B,et al. Outcome of patients with interstitial lung disease admitted to the  
56 intensive care unit. *Sarcoidosis Vasc Diffuse Lung Dis* 2013 ;30(2):134-42.  
57  
58 50.Kotani T, Katayama S, Miyazaki Y.Risk Factors for the Mortality of *Pneumocystis jirovecii* Pneumonia in  
59 Non-HIV Patients Who Required Mechanical Ventilation: A Retrospective Case Series Study. *Biomed Res Int*  
60 2017; 2017:7452604.

**Figure legend/caption:**

1  
2  
3  
4  
5  
6  
7  
8  
9  
10  
11  
12  
13  
14  
15  
16  
17  
18  
19  
20  
21  
22  
23  
24  
25  
26  
27  
28  
29  
30  
31  
32  
33  
34  
35  
36  
37  
38  
39  
40  
41  
42  
43  
44  
45  
46  
47  
48  
49  
50  
51  
52  
53  
54  
55  
56  
57  
58  
59  
60

Figure1: Study flowchart

Figure2: Duration of glucocorticoid use among glucocorticoid users with pneumonia

Figure3: Duration of glucocorticoid use among only glucocorticoid users with pneumonia

Figure4: Duration of glucocorticoid use among glucocorticoid and immunosuppressant users  
with pneumonia

For peer review only

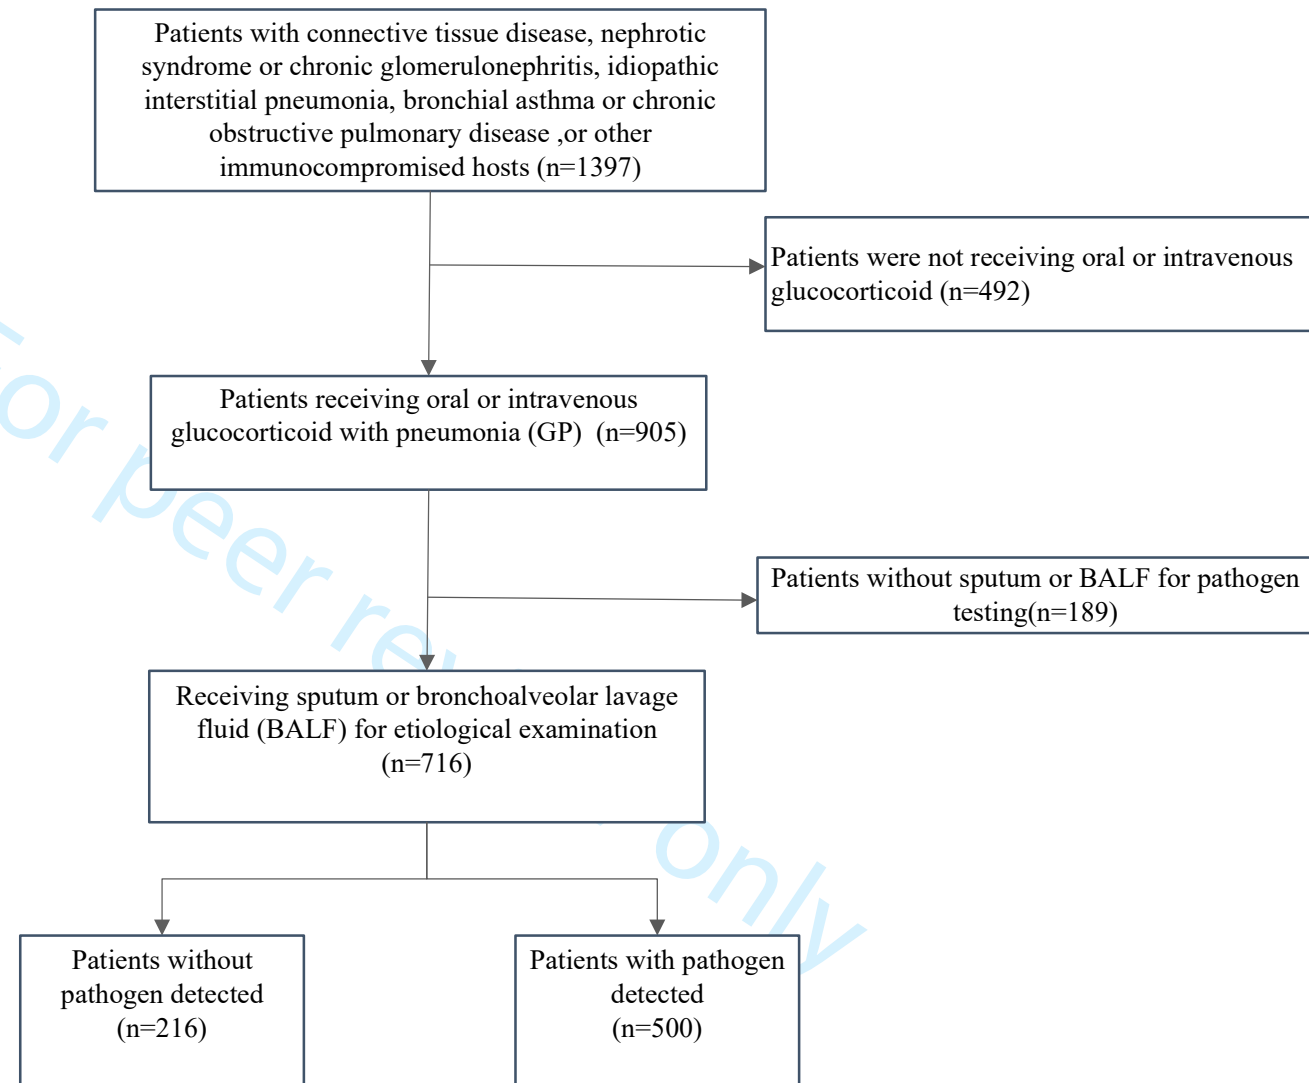

1  
2  
3  
4  
5  
6  
7  
8  
9  
10  
11  
12  
13  
14  
15  
16  
17  
18  
19  
20  
21  
22  
23  
24  
25  
26  
27  
28  
29  
30  
31  
32  
33  
34  
35  
36  
37  
38  
39  
40  
41  
42  
43  
44  
45  
46

For peer review only

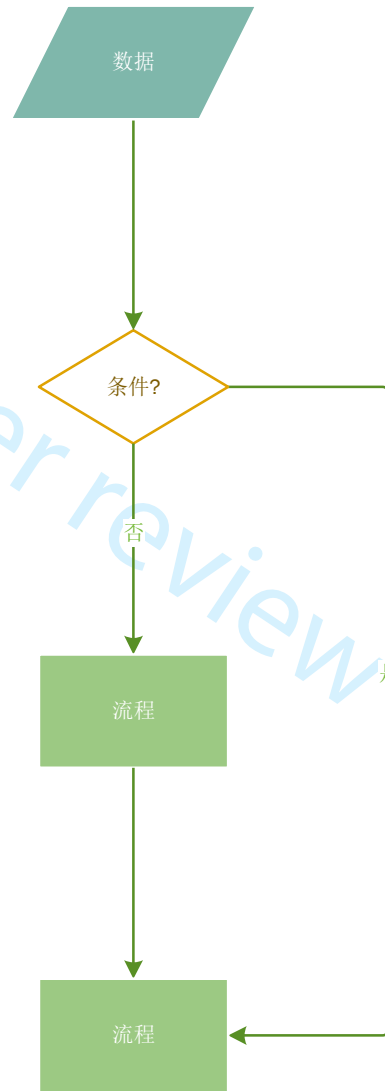



1  
2  
3  
4  
5  
6  
7  
8  
9  
10  
11  
12  
13  
14  
15  
16  
17  
18  
19  
20  
21  
22  
23  
24  
25  
26  
27  
28  
29  
30  
31  
32  
33  
34  
35  
36  
37  
38  
39  
40  
41  
42  
43  
44  
45  
46  
47  
48  
49  
50  
51  
52  
53  
54  
55  
56  
57  
58  
59  
60

## Time chart of infection

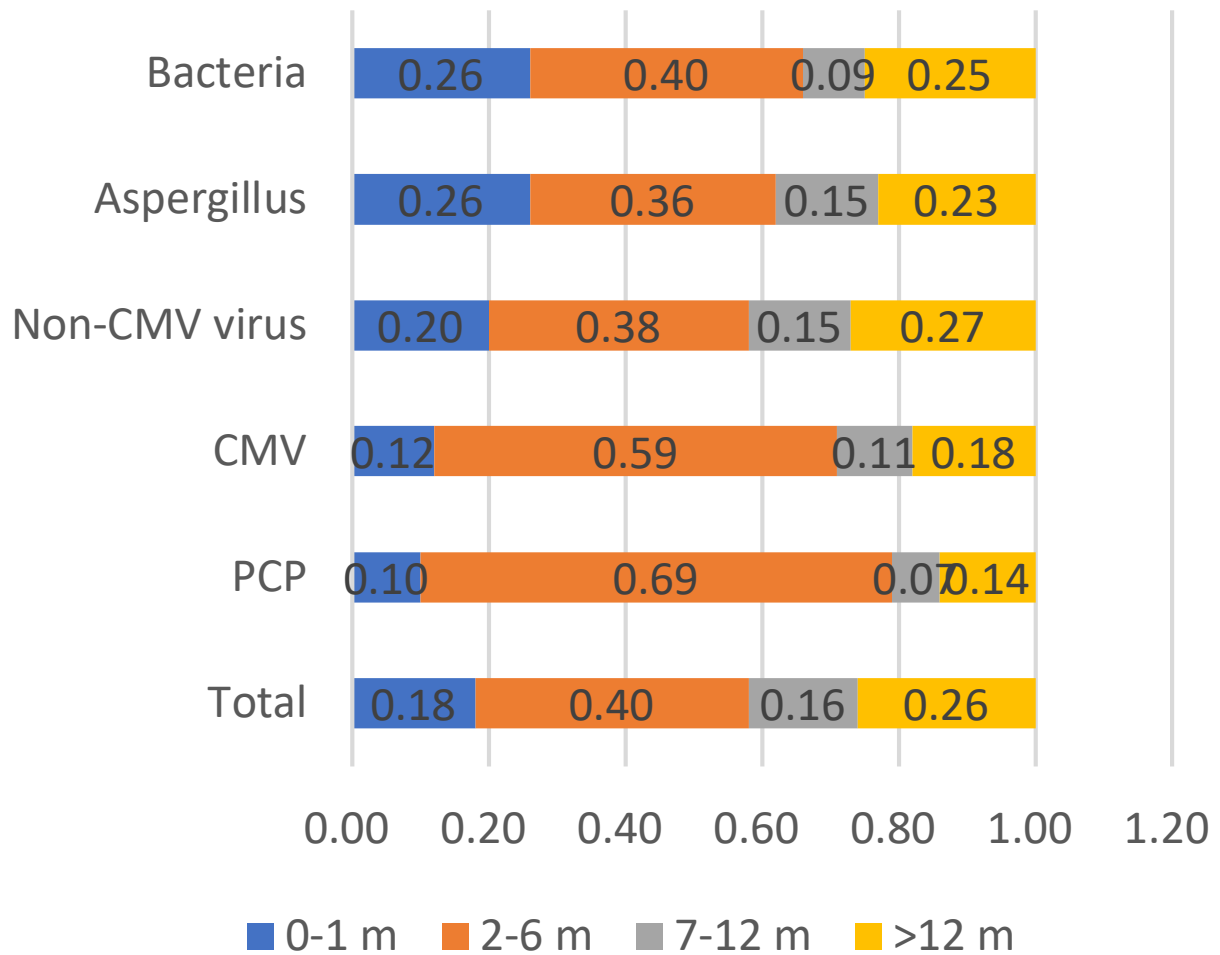

## Time chart of infection

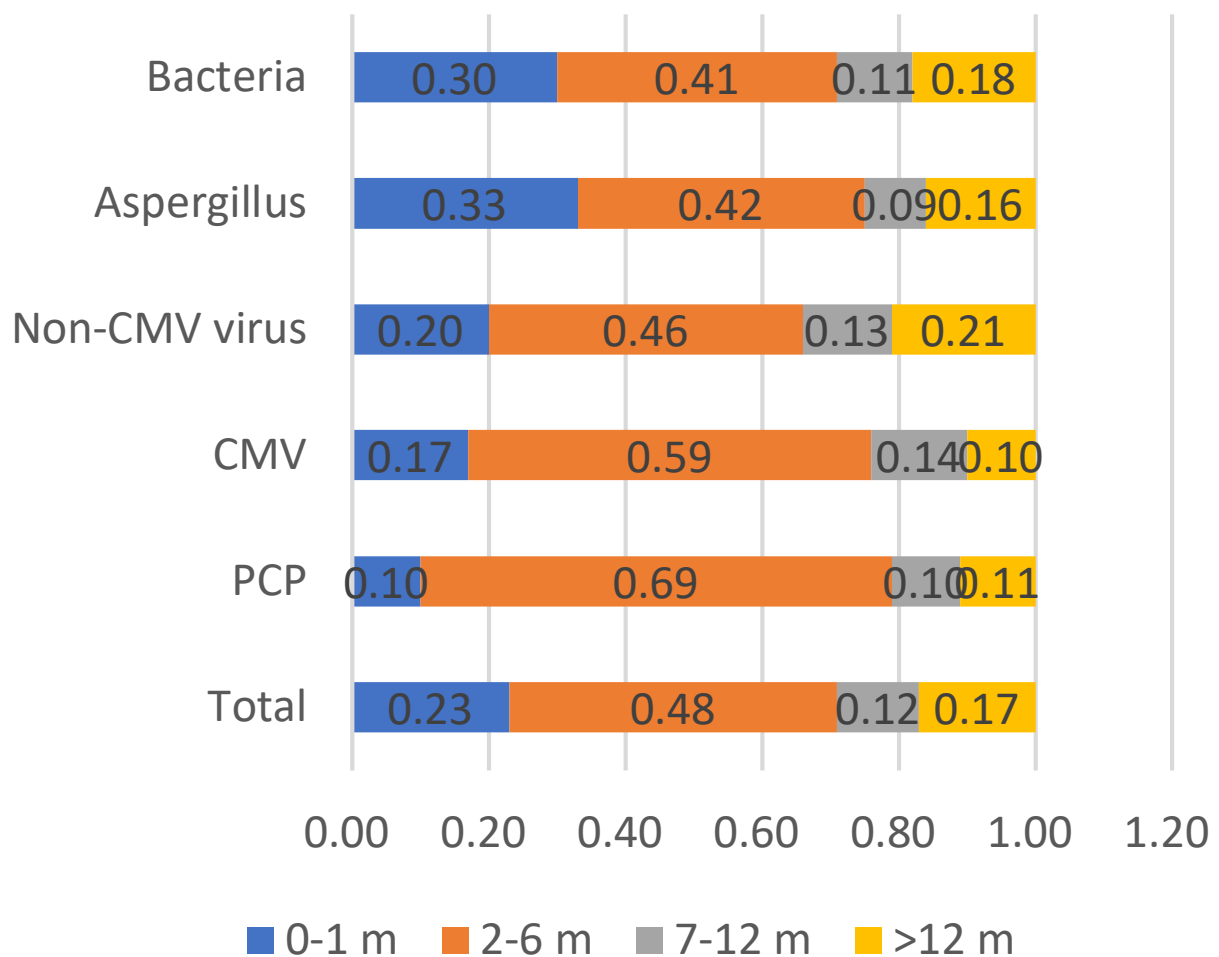

1  
2  
3  
4  
5  
6  
7  
8  
9  
10  
11  
12  
13  
14  
15  
16  
17  
18  
19  
20  
21  
22  
23  
24  
25  
26  
27  
28  
29  
30  
31  
32  
33  
34  
35  
36  
37  
38  
39  
40  
41  
42  
43  
44  
45  
46  
47  
48  
49  
50  
51  
52  
53  
54  
55  
56  
57  
58  
59  
60

## Time chart of infection

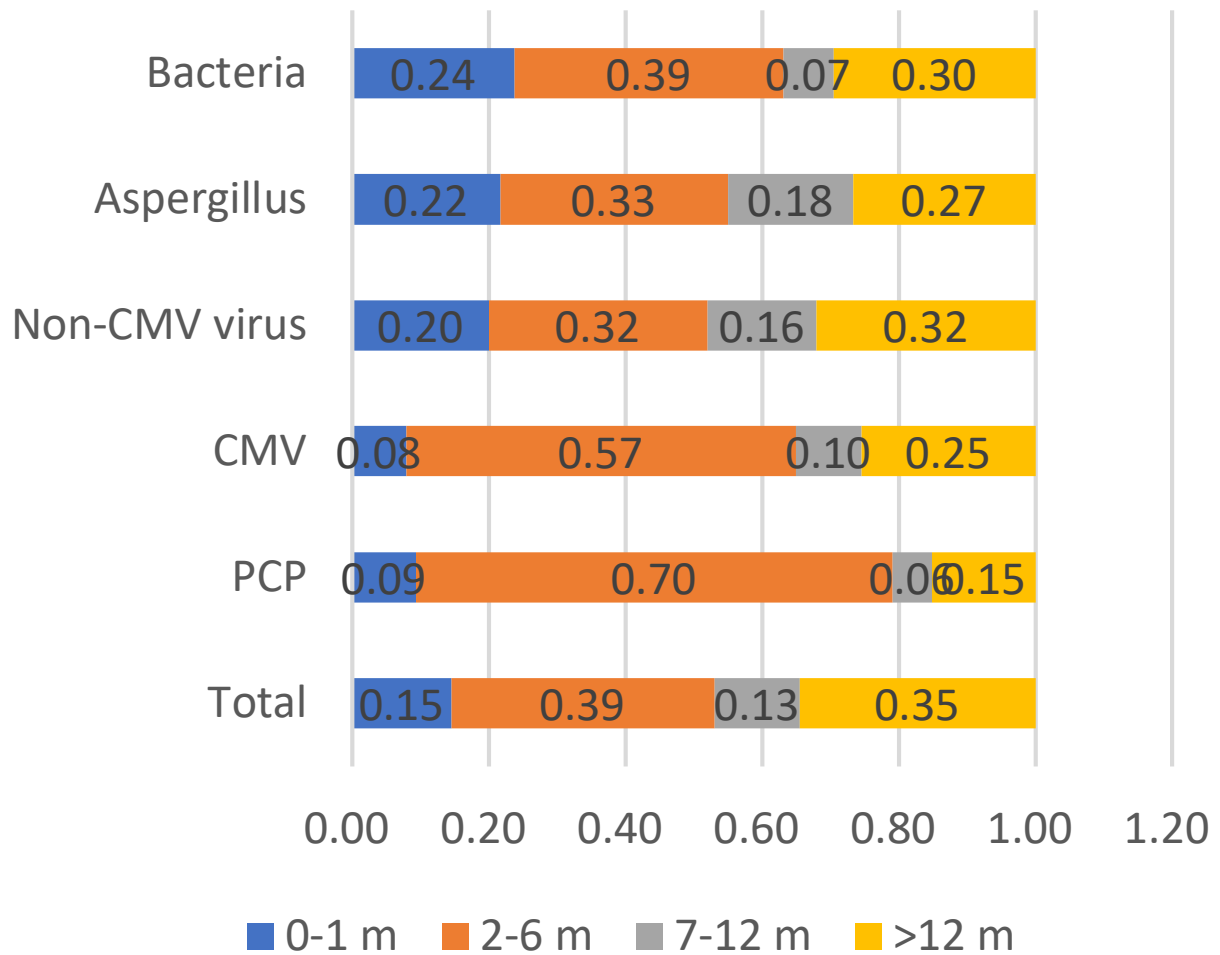

STROBE Statement—Checklist of items that should be included in reports of *cohort studies*

|                              | Item No | Recommendation                                                                                                                                                                                                                                                                                                         | Page No        |
|------------------------------|---------|------------------------------------------------------------------------------------------------------------------------------------------------------------------------------------------------------------------------------------------------------------------------------------------------------------------------|----------------|
| <b>Title and abstract</b>    | 1       | (a) Indicate the study's design with a commonly used term in the title or the abstract<br>(b) Provide in the abstract an informative and balanced summary of what was done and what was found                                                                                                                          | 1-2            |
| <b>Introduction</b>          |         |                                                                                                                                                                                                                                                                                                                        |                |
| Background/rationale         | 2       | Explain the scientific background and rationale for the investigation being reported                                                                                                                                                                                                                                   | 2-3            |
| Objectives                   | 3       | State specific objectives, including any prespecified hypotheses                                                                                                                                                                                                                                                       | 2-3            |
| <b>Methods</b>               |         |                                                                                                                                                                                                                                                                                                                        |                |
| Study design                 | 4       | Present key elements of study design early in the paper                                                                                                                                                                                                                                                                |                |
| Setting                      | 5       | Describe the setting, locations, and relevant dates, including periods of recruitment, exposure, follow-up, and data collection                                                                                                                                                                                        |                |
| Participants                 | 6       | (a) Give the eligibility criteria, and the sources and methods of selection of participants. Describe methods of follow-up<br>(b) For matched studies, give matching criteria and number of exposed and unexposed                                                                                                      | 4-5            |
| Variables                    | 7       | Clearly define all outcomes, exposures, predictors, potential confounders, and effect modifiers. Give diagnostic criteria, if applicable                                                                                                                                                                               | 4-5            |
| Data sources/<br>measurement | 8*      | For each variable of interest, give sources of data and details of methods of assessment (measurement). Describe comparability of assessment methods if there is more than one group                                                                                                                                   | 4-5            |
| Bias                         | 9       | Describe any efforts to address potential sources of bias                                                                                                                                                                                                                                                              | -              |
| Study size                   | 10      | Explain how the study size was arrived at                                                                                                                                                                                                                                                                              | 4              |
| Quantitative variables       | 11      | Explain how quantitative variables were handled in the analyses. If applicable, describe which groupings were chosen and why                                                                                                                                                                                           | 5              |
| Statistical methods          | 12      | (a) Describe all statistical methods, including those used to control for confounding<br>(b) Describe any methods used to examine subgroups and interactions<br>(c) Explain how missing data were addressed<br>(d) If applicable, explain how loss to follow-up was addressed<br>(e) Describe any sensitivity analyses | 6              |
| <b>Results</b>               |         |                                                                                                                                                                                                                                                                                                                        |                |
| Participants                 | 13*     | (a) Report numbers of individuals at each stage of study—eg numbers potentially eligible, examined for eligibility, confirmed eligible, included in the study, completing follow-up, and analysed<br>(b) Give reasons for non-participation at each stage<br>(c) Consider use of a flow diagram                        | 7 and Figure 1 |
| Descriptive data             | 14*     | (a) Give characteristics of study participants (eg demographic, clinical, social) and information on exposures and potential confounders<br>(b) Indicate number of participants with missing data for each variable of interest<br>(c) Summarise follow-up time (eg, average and total amount)                         | 7-8            |
| Outcome data                 | 15*     | Report numbers of outcome events or summary measures over time                                                                                                                                                                                                                                                         | 7-8            |

|    |                          |    |                                                                                                                                                                                                              |              |
|----|--------------------------|----|--------------------------------------------------------------------------------------------------------------------------------------------------------------------------------------------------------------|--------------|
| 1  | Main results             | 16 | (a) Give unadjusted estimates and, if applicable, confounder-adjusted estimates and their precision (eg, 95% confidence interval). Make clear which confounders were adjusted for and why they were included | 7-8          |
| 2  |                          |    | (b) Report category boundaries when continuous variables were categorized                                                                                                                                    |              |
| 3  |                          |    | (c) If relevant, consider translating estimates of relative risk into absolute risk for a meaningful time period                                                                                             |              |
| 4  |                          |    |                                                                                                                                                                                                              |              |
| 5  |                          |    |                                                                                                                                                                                                              |              |
| 6  |                          |    |                                                                                                                                                                                                              |              |
| 7  |                          |    |                                                                                                                                                                                                              |              |
| 8  |                          |    |                                                                                                                                                                                                              |              |
| 9  | Other analyses           | 17 | Report other analyses done—eg analyses of subgroups and interactions, and sensitivity analyses                                                                                                               | 7-8, Table 3 |
| 10 |                          |    |                                                                                                                                                                                                              |              |
| 11 | <b>Discussion</b>        |    |                                                                                                                                                                                                              |              |
| 12 |                          |    |                                                                                                                                                                                                              |              |
| 13 | Key results              | 18 | Summarise key results with reference to study objectives                                                                                                                                                     | 9            |
| 14 | Limitations              | 19 | Discuss limitations of the study, taking into account sources of potential bias or imprecision. Discuss both direction and magnitude of any potential bias                                                   | 11-12        |
| 15 |                          |    |                                                                                                                                                                                                              |              |
| 16 | Interpretation           | 20 | Give a cautious overall interpretation of results considering objectives, limitations, multiplicity of analyses, results from similar studies, and other relevant evidence                                   | 9-11         |
| 17 |                          |    |                                                                                                                                                                                                              |              |
| 18 |                          |    |                                                                                                                                                                                                              |              |
| 19 | Generalisability         | 21 | Discuss the generalisability (external validity) of the study results                                                                                                                                        | 9-11         |
| 20 |                          |    |                                                                                                                                                                                                              |              |
| 21 | <b>Other information</b> |    |                                                                                                                                                                                                              |              |
| 22 | Funding                  | 22 | Give the source of funding and the role of the funders for the present study and, if applicable, for the original study on which the present article is based                                                | 12           |
| 23 |                          |    |                                                                                                                                                                                                              |              |
| 24 |                          |    |                                                                                                                                                                                                              |              |

\*Give information separately for exposed and unexposed groups.

**Note:** An Explanation and Elaboration article discusses each checklist item and gives methodological background and published examples of transparent reporting. The STROBE checklist is best used in conjunction with this article (freely available on the Web sites of PLoS Medicine at <http://www.plosmedicine.org/>, Annals of Internal Medicine at <http://www.annals.org/>, and Epidemiology at <http://www.epidem.com/>). Information on the STROBE Initiative is available at <http://www.strobe-statement.org>.

# BMJ Open

## Aetiology and prognostic risk factors of mortality in pneumonia patients receiving glucocorticoids alone or glucocorticoids and other immunosuppressants: a retrospective cohort study

|                                 |                                                                                                                                                                                                                                                                                                                                                                                                                                                                                                                                                                                                                                                                                                                                                         |
|---------------------------------|---------------------------------------------------------------------------------------------------------------------------------------------------------------------------------------------------------------------------------------------------------------------------------------------------------------------------------------------------------------------------------------------------------------------------------------------------------------------------------------------------------------------------------------------------------------------------------------------------------------------------------------------------------------------------------------------------------------------------------------------------------|
| Journal:                        | <i>BMJ Open</i>                                                                                                                                                                                                                                                                                                                                                                                                                                                                                                                                                                                                                                                                                                                                         |
| Manuscript ID                   | bmjopen-2020-037419.R2                                                                                                                                                                                                                                                                                                                                                                                                                                                                                                                                                                                                                                                                                                                                  |
| Article Type:                   | Original research                                                                                                                                                                                                                                                                                                                                                                                                                                                                                                                                                                                                                                                                                                                                       |
| Date Submitted by the Author:   | 10-Jul-2020                                                                                                                                                                                                                                                                                                                                                                                                                                                                                                                                                                                                                                                                                                                                             |
| Complete List of Authors:       | Li, Lijuan; China-Japan Friendship Hospital, Hsu, Steven H.; Houston Methodist Hospital Gu, Xiaoying; China-Japan Friendship Hospital Jiang, Shan; China-Japan Friendship Hospital Shang, Lianhan; China-Japan Friendship Hospital Sun, Guolei; China-Japan Friendship Hospital Sun, Lingxiao; China-Japan Friendship Hospital Zhang, Li; China-Japan Friendship Hospital Wang, Chuan; First Hospital of Shijiazhuang Ren, Yali; Second Hospital of Hebei Medical University Wang, Jinxiang; Capital Medical University, respiratory and critical care medicine, Beijing Luhe Hospital Pan, Jianliang; Second People's Hospital of Weifang Liu, Jiangbo Bin, Cao; China-Japan Friendship Hospital, Department of Respiratory and Critical Care Medicine |
| <b>Primary Subject Heading</b>: | Infectious diseases                                                                                                                                                                                                                                                                                                                                                                                                                                                                                                                                                                                                                                                                                                                                     |
| Secondary Subject Heading:      | Intensive care, Respiratory medicine                                                                                                                                                                                                                                                                                                                                                                                                                                                                                                                                                                                                                                                                                                                    |
| Keywords:                       | INFECTIOUS DISEASES, Adult intensive & critical care < INTENSIVE & CRITICAL CARE, Diagnostic microbiology < INFECTIOUS DISEASES, Microbiology < NATURAL SCIENCE DISCIPLINES, Respiratory infections < THORACIC MEDICINE                                                                                                                                                                                                                                                                                                                                                                                                                                                                                                                                 |
|                                 |                                                                                                                                                                                                                                                                                                                                                                                                                                                                                                                                                                                                                                                                                                                                                         |

SCHOLARONE™  
Manuscripts



I, the Submitting Author has the right to grant and does grant on behalf of all authors of the Work (as defined in the below author licence), an exclusive licence and/or a non-exclusive licence for contributions from authors who are: i) UK Crown employees; ii) where BMJ has agreed a CC-BY licence shall apply, and/or iii) in accordance with the terms applicable for US Federal Government officers or employees acting as part of their official duties; on a worldwide, perpetual, irrevocable, royalty-free basis to BMJ Publishing Group Ltd ("BMJ") its licensees and where the relevant Journal is co-owned by BMJ to the co-owners of the Journal, to publish the Work in this journal and any other BMJ products and to exploit all rights, as set out in our [licence](#).

The Submitting Author accepts and understands that any supply made under these terms is made by BMJ to the Submitting Author unless you are acting as an employee on behalf of your employer or a postgraduate student of an affiliated institution which is paying any applicable article publishing charge ("APC") for Open Access articles. Where the Submitting Author wishes to make the Work available on an Open Access basis (and intends to pay the relevant APC), the terms of reuse of such Open Access shall be governed by a Creative Commons licence – details of these licences and which [Creative Commons](#) licence will apply to this Work are set out in our licence referred to above.

Other than as permitted in any relevant BMJ Author's Self Archiving Policies, I confirm this Work has not been accepted for publication elsewhere, is not being considered for publication elsewhere and does not duplicate material already published. I confirm all authors consent to publication of this Work and authorise the granting of this licence.

1  
2  
3  
4 **Aetiology and prognostic risk factors of mortality in pneumonia**  
5  
6 **patients receiving glucocorticoids alone or glucocorticoids and other**  
7  
8 **immunosuppressants: a retrospective cohort study**  
9  
10

11  
12  
13 Lijuan Li<sup>1</sup>, Steven H. Hsu<sup>2</sup>, Xiaoying Gu<sup>3</sup>, Shan Jiang<sup>1</sup>, Lianhan Shang<sup>1</sup>, Guolei Sun<sup>1</sup>, Lingxiao Sun<sup>4</sup>, Li Zhang<sup>1</sup>,  
14  
15 Chuan Wang<sup>5</sup>, Yali Ren<sup>6</sup>, Jinxiang Wang<sup>7</sup>, Jianliang Pan<sup>8</sup>, Jiangbo Liu<sup>9</sup>, Bin Cao<sup>1,10,11</sup>  
16

17  
18  
19 *1. Department of Pulmonary and Critical Care Medicine, National Center for Clinical Research on Respiratory*  
20  
21 *Diseases, China-Japan Friendship Hospital, Beijing 100029, China*  
22

23 *2. Department of Medicine, Houston Methodist Hospital, Houston, TX 77030, USA*  
24

25 *3. Department of Institute of Clinical Medical Sciences, China-Japan Friendship Hospital, Institute of Respiratory*  
26  
27 *Medicine, Chinese Academy of Medicine Science, National Clinical Research Center of Respiratory Diseases,*  
28  
29 *Beijing 10029, China*

30  
31 *4. Clinical Center for Pulmonary Infections, Capital Medical University, Beijing 100029, China*  
32

33 *5. Department of Pulmonary and Critical Care Medicine, First Hospital of Shijiazhuang, Shijiazhuang 050011,*  
34  
35 *China*

36  
37 *6. Department of Pulmonary and Critical Care Medicine, Second Hospital of Hebei Medical University,*  
38  
39 *Shijiazhuang 050000, China*

40  
41 *7. Department of Respiratory and Critical Care Medicine, Beijing Luhe Hospital of Capital Medical University,*  
42  
43 *Beijing 101100, China*

44  
45 *8. Department of Pulmonary and Critical Care Medicine, Second People's Hospital of Weifang, Weifang 261041,*  
46  
47 *China*

48  
49 *9. Department of Pulmonary and Critical Care Medicine, Tianjin First Central Hospital, Tianjin 300192, China*

50  
51 *10. Institute of Respiratory Medicine, Chinese Academy of Medical Science, Beijing 100029, China*

52  
53 *11. Tsinghua University-Peking University Joint Center for Life Sciences, Beijing, China*  
54

55  
56 \* Corresponding author: Bin Cao, caobin\_ben@163.com, Department of Pulmonary and Critical  
57  
58 Care Medicine, China-Japan Friendship Hospital; 2 Yinghuayuan E St, Chaoyang District, Beijing  
59  
60 100029, China



1  
2  
3  
4  
5  
6  
7  
8  
9  
10  
11  
12  
13  
14  
15  
16  
17  
18  
19  
20  
21  
22  
23  
24  
25  
26  
27  
28  
29  
30  
31  
32  
33  
34  
35  
36  
37  
38  
39  
40  
41  
42  
43  
44  
45  
46  
47  
48  
49  
50  
51  
52  
53  
54  
55  
56  
57  
58  
59  
60

**Word Count:** 3,120

For peer review only

**ABSTRACT**

**Objectives:** Long-term use of high-dose glucocorticoids can lead to severe immunosuppression and increased risk of treatment-resistant pneumonia and mortality. We investigated the aetiology

1  
2  
3  
4 and prognostic risk factors of mortality in hospitalised patients who developed pneumonia while  
5 receiving glucocorticoid therapy alone or glucocorticoid and other immunosuppressant therapies.

6  
7 **Design:** Retrospective cohort study

8  
9 **Setting:** Six secondary and tertiary academic hospitals in China

10  
11 **Participants:** Patients receiving glucocorticoids who were hospitalised with pneumonia between  
12 1<sup>st</sup> January 2013 and 31<sup>st</sup> December 2019.

13  
14  
15 **Main Outcomes:** We analysed the prevalence of comorbidities, microbiology, antibiotic  
16 susceptibility patterns, 30-day and 90-day mortality rates, and prognostic risk factors.

17  
18  
19 **Results:** A total of 716 patients were included, with pneumonia pathogens identified in 69.8% of  
20 patients. Significant morbidities occurred, including respiratory failure (50.8%), intensive care  
21 unit (ICU) transfer (40.8%), and mechanical ventilation (36%), with a 90-day mortality rate of  
22 26.0%. Diagnosis of pneumonia occurred within 6 months of glucocorticoid initiation for 69.7%  
23 of patients with *Cytomegalovirus* (CMV) pneumonia and 79.0% of patients with *Pneumocystis*  
24 *jirovecii* pneumonia (PCP). Pathogens, including *Pneumocystis*, CMV, and multidrug-resistant  
25 bacteria, were identified more frequently in patients with persistent lymphocytopenia and high-  
26 dose glucocorticoid treatment ( $\geq 30$  mg/day of prednisolone or equivalent within 30 days before  
27 admission). The 90-day mortality rate was significantly lower for non-CMV viral pneumonias  
28 than for PCP ( $P < 0.05$ ), with a similar mortality rate as CMV pneumonias (24.2% vs 38.1% vs  
29 27.4%, respectively). Cox regression analysis indicated several independent negative predictors  
30 for mortality in this patient population, including septic shock, respiratory failure, persistent  
31 lymphocytopenia, interstitial lung disease, and high-dose glucocorticoid use.

32  
33  
34  
35  
36  
37  
38  
39  
40  
41  
42  
43  
44 **Conclusions:** Patients who developed pneumonia while receiving glucocorticoid therapy  
45 experienced high rates of opportunistic infections, with significant morbidity and mortality. These  
46 findings should be carefully considered when determining treatment strategies for this patient  
47 population.  
48  
49  
50  
51

52  
53  
54 **KEYWORDS:** Pneumonia; Immunocompromised; Glucocorticoids; Prognosis.  
55  
56  
57  
58  
59  
60

## ARTICLE SUMMARY

**Strengths and limitations of this study**

- This is the first large-scale investigation of the aetiologies and prognostic risk factors of pneumonia in patients using glucocorticoids.
- This study had several strengths, including a large sample size from multiple centres (six hospitals in China) and examinations of sputum or bronchoalveolar lavage samples in all patients.
- In this retrospective study, all pneumonia patients did not undergo the full array of pathogen testing, and some pathogens were not identified until at least 48 hours after admission, increasing the probability of nosocomial infections.

## INTRODUCTION

Long-term use of glucocorticoids at high doses may result in severe immunosuppression and serious infections.[1] Pulmonary infections occur most commonly in this context and remain one of the leading causes of death in immunocompromised patients.[1-4] Infections caused by opportunistic pathogens, including *Cytomegalovirus* (CMV), *Pneumocystis jirovecii*, and *Aspergillus*, have been reported in immunocompromised patients receiving glucocorticoids.[2-4] Mortality rates of up to 45% have been identified in patients with rheumatic diseases treated with long-term glucocorticoid therapy who develop pulmonary infections, with rates increasing to 93% for those requiring mechanical ventilation.[1] The paucity of studies related to patients who develop pneumonia while receiving glucocorticoid therapy may lead to an underestimation of pneumonia prevalence and an overestimation of disease burden in this patient population. These assumptions may result in mismanagement, with excessive use of broad-spectrum antibiotics and treatment failure due to absence of therapeutic guidance based on pathogenic data. Given the significant morbidity and mortality associated with glucocorticoid-induced immunosuppression, our study aimed to identify the clinical characteristics, pathogenic aetiologies, and prognostic risk factors of pneumonia in this population.

## METHODS

### Study design and participants

We retrospectively recruited patients with pneumonia who were hospitalised between 1<sup>st</sup> January 2013 and 31<sup>st</sup> December 2017 at six secondary and tertiary academic hospitals in China. Pneumonia diagnoses were based on the American Thoracic Society and Infectious Disease Society of America's (ATS/IDSA) guidelines.[5, 6] Pneumonia was defined as the presence of a new pulmonary infiltrate with infiltrative changes identified on chest radiography or computed tomography (CT) imaging combined with one or more of the following clinical manifestations: (1) recent cough, sputum production or aggravation of respiratory symptoms, and emergence of purulent sputum with or without chest pain; (2) fever (defined as an axillary temperature of  $\geq 37.3^{\circ}\text{C}$ ) or hypothermia (defined as an axillary temperature  $< 36^{\circ}\text{C}$ ); (3) clinical signs of pulmonary consolidation and/or presence of moist crackles; or (4) white cell count  $> 10 \times 10^9/\text{L}$  or  $< 4 \times 10^9/\text{L}$ , with or without neutrophilic predominance. We identified patients with connective

1  
2  
3  
4 tissue diseases, nephrotic syndrome or chronic glomerulonephritis, idiopathic interstitial  
5 pneumonia, bronchial asthma, chronic obstructive pulmonary disease, or other causes for  
6 immunosuppressive therapy. Study patients were then selected based on the following inclusion  
7 criteria: (1) oral or intravenous glucocorticoid treatment [7-9] before admission; (2) pneumonia  
8 diagnosis on admission or during hospitalisation; and (3) at least 16 years of age. The exclusion  
9 criteria were as follows: (1) diagnosis of noninfectious pulmonary diseases, including lung cancer,  
10 interstitial lung diseases without infection, pulmonary embolism, or heart failure; (2) inability to  
11 provide consent for procedures.  
12  
13  
14  
15  
16  
17  
18

### 19 **Study quality control**

20  
21 Key investigators, including clinicians, statisticians, microbiologists, and radiologists,  
22 worked together to draft the protocol and to create a single formatted case report form (CRF) used  
23 by all centres. Before study initiation, all investigators from the six centres received training  
24 related to the study protocol, including the screening process, definitions of underlying diseases,  
25 and the formatted CRF. After data were collected, CRFs were reviewed by a trained researcher to  
26 ensure completeness and data quality. The study was led and approved by the Ethics Committee at  
27 China-Japan Friendship Hospital with centralised collaboration between all participating hospitals,  
28 including anonymised data submission and collection.  
29  
30  
31  
32  
33  
34  
35  
36

### 37 **Data collection**

38  
39 The following data were collected from medical records of patients during their  
40 hospitalisations: (1) demographics; (2) clinical symptoms; (3) initial vital signs and lung  
41 examination findings; (4) severity of disease (indicated by intensive care unit [ICU] admission,  
42 use of invasive or noninvasive mechanical ventilation, pneumonia severity index [PSI] score,  
43 and/or CURB-65 score);[10-12] (5) laboratory and microbiological data (blood, sputum and/or  
44 bronchoalveolar lavage samples, bacterial or fungal cultures, viral nucleic acid detection, and  
45 antibiotic susceptibility patterns); (6) treatment information, including use of vasoactive agents,  
46 antimicrobials, glucocorticoids, and/or other immunosuppressants; and (7) survival status 30 days  
47 and 90 days after admission. High-dose steroid use was defined as equal to or greater than 30 mg  
48 per day of prednisolone or an equivalent glucocorticoid within 30 days before admission.  
49 Persistent lymphocytopenia was defined as a peripheral blood lymphocyte count lower than  
50  $1 \times 10^9/L$  for greater than 7 days.  
51  
52  
53  
54  
55  
56  
57  
58  
59  
60

## Diagnostic procedures

After identification of pulmonary infiltrates on chest imaging, bronchoalveolar lavage (BAL) or sputum samples were obtained by treating physicians, and microorganisms were identified and tested for drug sensitivities. Bronchoscopic examinations were performed according to general guidelines. Lidocaine spray was applied to the upper airway and carina for local anaesthesia, and airways were thoroughly examined. BAL was performed by instilling 60 to 120 mL of a sterile saline solution 2 to 4 times into the distal bronchial tree, either at the affected lobe or in the middle lung lobe with more radiographic abnormalities. BAL specimens were aliquoted and immediately transported to laboratories. Bacterial cultures were incubated at 35°C in 5% to 10% CO<sub>2</sub> for 48 hours. If *Nocardia* was suspected, the incubation time was prolonged. Fungal cultures were incubated at 27°C for 5 days under ambient conditions. Species were identified using matrix-assisted laser desorption/ionisation time-of-flight mass spectrometry (Brooks Instrument, Germany) or a BACTEC 9102 culture instrument (BD Biosciences, USA). Respiratory viral and atypical pathogens were detected by polymerase chain reactions (PCR) (Shanghai Zhijiang Biological Technology, China). The Platelia Aspergillus test was used for galactomannan detection (Bio-Rad Laboratories, Marnes-la-Coquette, France).

## Pathogen-specific diagnostic information

We defined multidrug-resistance (MDR) in specific organisms using the European Centre for Disease Prevention and Control (ECDC) and the Centers for Disease Control and Prevention (CDC) criteria. We included the following species in this category: methicillin-resistant *Staphylococcus aureus* (MRSA), vancomycin-resistant *Enterococcus* (VRE), and *Enterobacteriaceae* producing extended-spectrum beta-lactamases (ESBL). *Pseudomonas aeruginosa*, *Acinetobacter baumannii*, and other nonfermenting Gram-negative bacilli were considered to be MDR pathogens if not susceptible to at least one agent in three or more antimicrobial categories. [13, 14]

For diagnoses of pneumonias caused by atypical pathogens, including *Legionella* spp, *Mycoplasma pneumoniae*, and *Mycobacterium* spp, we used PCR to identify bacterial DNA. Diagnoses of viral pneumonias were based on positive nucleic acid tests. For diagnosis of an *Aspergillus* pneumonia, one or more of the following criteria were required: (1) histopathologic or direct microscopic evidence of dichotomous septate hyphae with a positive culture for *Aspergillus*

1  
2  
3  
4 from tissue, (2) positive *Aspergillus* culture from BAL, (3) galactomannan optical index on BAL  
5 of  $\geq 1$ , (4) galactomannan optical index on serum of  $\geq 0.5$ , or (5) *Aspergillus* species identified by  
6 culture characteristics and microscopic morphology.[15, 16]  
7

8  
9  
10  
11  
12  
13  
14  
15  
16  
17  
18  
19  
20  
21  
22  
23  
24  
25  
26  
27  
28  
29  
30  
31  
32  
33  
34  
35  
36  
37  
38  
39  
40  
41  
42  
43  
44  
45  
46  
47  
48  
49  
50  
51  
52  
53  
54  
55  
56  
57  
58  
59  
60  
Diagnosis of PCP required the following criteria: (1) high-resolution CT (HRCT) imaging showing diffuse ground-glass opacity (GGO) with a patchy distribution and (2) microscopic examination of respiratory samples demonstrating *Pneumocystis* cystic or trophic forms or *Pneumocystis* DNA identified using PCR.[17]

### Statistical analysis

Demographics, clinical characteristics, and pathogen testing results were expressed as means ( $\pm$  standard deviation), medians (interquartile range), or numbers (percentage). Group comparisons were conducted using the Student's *t*-test or Wilcoxon rank-sum test for continuous variables with or without normal distributions, respectively. Categorical variables were compared between groups using the  $\chi^2$  test. Histogram charts were used to depict glucocorticoid application timelines. Distributions for the duration of glucocorticoid use in patients with different respiratory pathogens were also compared using the  $\chi^2$  test. Cox regression models were used to analyse the associations of septic shock, interstitial lung diseases, invasive and noninvasive mechanical ventilation, partial pressure of arterial oxygen and fraction of inspired oxygen ratio ( $\text{PaO}_2/\text{FiO}_2$ ), and persistent lymphocytopenia with 30-day and 90-day mortality. In the Cox analysis, adjustments were made for age, gender, noninvasive mechanical ventilation, invasive mechanical ventilation, respiratory failure, septic shock, ICU admission, high-dose corticosteroid use, persistent lymphocytopenia, interstitial lung disease, PSI score, CURB65 score, PCP, and CMV and non-CMV viral infections.

Statistical analyses were performed using SPSS, version 19.0 (SPSS, Inc., Chicago, Illinois). All tests were two-sided, and a *P*-value of  $< 0.05$  was considered to indicate statistical significance.

### Patient and public involvement

Neither patients nor the public were involved in the development of the research question, study design, patient recruitment, nor the conduct of the study.

### RESULTS

In total, 1,397 immunocompromised patients who developed pneumonia between 1<sup>st</sup> January

2013 and 31<sup>st</sup> December 2017 were identified. After excluding patients who were not receiving oral or intravenous glucocorticoids (N = 492) and those without sputum or BAL for pathogen testing (N = 189), 716 patients with pneumonia who were receiving glucocorticoids were included in the final analysis (Figure 1). Approximately 48% of study patients were female, with a median age of 60. The main presenting symptoms included fever (74.6%), cough (87.7%), and dyspnoea (60.2%). The most common underlying immune-related diseases were connective tissue diseases (52.1%), interstitial lung disease (45.3%), diabetes (25%), and nephrotic syndrome or chronic glomerulonephritis (12.8%). The average duration (IQR) of glucocorticoid use was 4 (2,18) months. The positivity rate for pathogen testing was 69.8% (500/716). Among the 292 (40.8%) patients who required ICU admission, 24.2% and 24% received noninvasive and invasive ventilation, respectively. The 30-day and 90-day mortality rates were 22.6% and 26.0%, respectively. Complication rates were similar between patients using glucocorticoids alone and patients using glucocorticoids with other immunosuppressants (Table 1).

**Table 1** Clinical characteristics of pneumonia between glucocorticoid users and those glucocorticoids with immunosuppressants users

| Variables                               | Total, N=716           | Glucocorticoid users,<br>N=297 | Glucocorticoid with<br>immunosuppressants*<br>users, N=419 | P-Value |
|-----------------------------------------|------------------------|--------------------------------|------------------------------------------------------------|---------|
| Sex, female, n (%)                      | 341(47.6)              | 123(41.4)                      | 218(52.0)                                                  | 0.005   |
| Age, median (IQR)                       | 60(49, 68)             | 62.0(52.0, 70.0)               | 59.0(46.0, 67.0)                                           | <0.001  |
| Symptoms and signs, n (%)               |                        |                                |                                                            |         |
| Fever                                   | 534(74.6)              | 225(75.8)                      | 309(73.7)                                                  | 0.543   |
| Cough                                   | 628(87.7)              | 267(89.9)                      | 361(86.2)                                                  | 0.133   |
| Sputum production                       | 580(81.0)              | 239(80.5)                      | 341(81.4)                                                  | 0.829   |
| Dyspnea                                 | 431(60.2)              | 185(62.3)                      | 246(58.7)                                                  | 0.335   |
| Disturbance of consciousness            | 40(6.2)                | 11(3.7)                        | 29(6.9)                                                    | 0.065   |
| Laboratory examination                  |                        |                                |                                                            |         |
| White blood cell, $\times 10^9/L$ (IQR) | 7.94(5.79, 11.60)      | 9.27 (6.37, 12.63)             | 7.51 (5.37, 10.97)                                         | <0.001  |
| Neutrophils, $\times 10^9/L$ (IQR)      | 6.49(4.28, 10.08)      | 7.35(4.89, 10.83)              | 6.05 (4.10, 9.35)                                          | <0.001  |
| Lymphocyte, $\times 10^9/L$ (IQR)       | 0.85(0.50, 1.38)       | 0.95 (0.60, 1.46)              | 0.80 (0.45, 1.30)                                          | 0.004   |
| Persistent lymphocytopenia              | 304(42.7)              | 113(38.0)                      | 191(45.6)                                                  | 0.044   |
| Mean hemoglobin $\pm$ SD, g/L           | 111.8 $\pm$ 23.9       | 113.1 $\pm$ 24.2               | 108.4 $\pm$ 22.8                                           | 0.034   |
| Mean albumin $\pm$ SD, g/L              | 32.4 $\pm$ 6.4         | 33.3 $\pm$ 6.2                 | 29.9 $\pm$ 6.1                                             | <0.001  |
| Lactate dehydrogenase, U/L              | 328.5(227.8,<br>506.0) | 338.0 (226.0, 528.0)           | 312.0 (228.5, 495.0)                                       | 0.525   |
| Blood urea nitrogen, mmol/L             | 6.28(4.60, 9.80)       | 6.24 (4.60, 9.40)              | 6.50 (4.63, 10.24)                                         | 0.372   |



| Variables                                                           | Total, N=716           | Glucocorticoid users,<br>N=297 | Glucocorticoid with<br>immunosuppressants*<br>users, N=419 | P-Value |
|---------------------------------------------------------------------|------------------------|--------------------------------|------------------------------------------------------------|---------|
| Serum creatinine, mmol/L                                            | 64.0(50.8, 90.2)       | 62.6 (50.0, 81.2)              | 65.9 (51.1, 99.1)                                          | 0.157   |
| Procalcitonin, ng/ml                                                | 0.28(0.12, 0.77)       | 0.29 (0.14, 0.71)              | 0.27(0.11, 0.81)                                           | 0.613   |
| Oxygenation index                                                   | 241.4(126.6,<br>347.6) | 228.0(128.1, 351.2)            | 243.1(122.4, 347.6)                                        | <0.001  |
| Severe pneumonia index score                                        | 76.5(59.3, 101.0)      | 77.0(60.0, 103.0)              | 76.0(57.0, 100.0)                                          | 0.845   |
| CURB65 score>1                                                      | 211(29.5)              | 88(29.6)                       | 123(1.0, 2.0)                                              | 0.937   |
| Underlying immune defect, n (%)                                     |                        |                                |                                                            |         |
| Diabetes mellitus                                                   | 179(25.0)              | 63(21.2)                       | 116(27.7)                                                  | 0.049   |
| Tumor                                                               | 43(6.0)                | 20(6.7)                        | 23(5.5)                                                    | 0.490   |
| Connective tissue disease**                                         | 368(51.4)              | 111(37.4)                      | 257(61.3)                                                  | <0.001  |
| Interstitial lung disease                                           | 324(45.3)              | 115(38.7)                      | 209(49.9)                                                  | 0.003   |
| Nephrotic syndrome or chronic<br>glomerulonephritis                 | 90(12.6)               | 42(14.1)                       | 48(11.5)                                                   | 0.286   |
| Idiopathic interstitial pneumonia                                   | 73(10.2)               | 56(18.9)                       | 17(4.1)                                                    | <0.001  |
| Bronchial asthma or chronic obstructive<br>pulmonary disease        | 30(4.2)                | 30(10.1)                       | 0(0)                                                       | <0.001  |
| Lymphoma                                                            | 17(2.4)                | 8(2.7)                         | 9(2.1)                                                     | 0.628   |
| Bone marrow or hematopoietic stem cell<br>transplant                | 7(1.0)                 | 1(0.3)                         | 6(1.4)                                                     | 0.144   |
| Solid organ transplant                                              | 63(8.8)                | 0(0)                           | 63(15.0)                                                   | <0.001  |
| Radiation pneumonitis                                               | 8(1.1)                 | 7(2.4)                         | 1(0.2)                                                     | 0.008   |
| Other immunocompromised hosts†                                      | 65(9.1)                | 46(15.5)                       | 19(4.5)                                                    | <0.001  |
| Bronchoalveolar lavage, n (%)                                       | 366(51.1)              | 248(83.5)                      | 118(28.2)                                                  | <0.001  |
| Total pathogenic positive rate                                      | 500(69.8)              | 218(73.4)                      | 282(67.3)                                                  | 0.080   |
| Treatment, before admission, n (%)                                  |                        |                                |                                                            |         |
| High-dose steroids(>1mg/kg/day)                                     | 216(30.2)              | 134(45.1)                      | 82(19.6)                                                   | <0.001  |
| Time of steroids use, median (IQR), month                           | 4.0(2.0, 18.0)         | 3.0(1.6, 9.0)                  | 6.0(2.0, 24.0)                                             | <0.001  |
| Accumulated dose of glucocorticoids,<br>methylprednisolone, g (IQR) | 38(1.9, 8.8)           | 3.0(1.5, 5.4)                  | 4.8(2.2, 12.5)                                             | <0.001  |
| Antibiotics                                                         | 502(70.1)              | 219(73.7)                      | 283(67.5)                                                  | 0.074   |
| Antiviral drugs                                                     | 113(15.8)              | 44(14.8)                       | 69(16.5)                                                   | 0.550   |
| Treatment, during hospitalization, n (%)                            |                        |                                |                                                            |         |
| Anti - Pseudomonas aeruginosa drugs                                 | 547(76.4)              | 220(74.1)                      | 327(78.0)                                                  | 0.218   |
| Voriconazole or caspofungin                                         | 282(39.4)              | 105(35.4)                      | 177(42.2)                                                  | 0.063   |
| Ganciclovir                                                         | 336(46.9)              | 120(40.4)                      | 216(51.6)                                                  | 0.003   |
| Trimethoprim                                                        | 333(46.5)              | 111(37.4)                      | 222(53.0)                                                  | <0.001  |
| Complications, n (%)                                                |                        |                                |                                                            |         |
| Noninvasive ventilation                                             | 173(24.2)              | 63(21.2)                       | 110(26.3)                                                  | 0.121   |
| Invasive mechanical ventilation                                     | 172(24.0)              | 70(23.6)                       | 102(24.3)                                                  | 0.811   |
| Mechanical ventilation                                              | 258(36.0)              | 106(35.7)                      | 152(36.3)                                                  | 0.872   |
| Respiratory failure                                                 | 364(50.8)              | 155(52.2)                      | 209(49.9)                                                  | 0.543   |

| Variables                           | Total, N=716 | Glucocorticoid users,<br>N=297 | Glucocorticoid with<br>immunosuppressants*<br>users, N=419 | P-Value |
|-------------------------------------|--------------|--------------------------------|------------------------------------------------------------|---------|
| ICU admission                       | 292(40.8)    | 116(39.1)                      | 176(42.0)                                                  | 0.429   |
| Septic shock during hospitalization | 154(21.5)    | 64(21.5)                       | 90(21.5)                                                   | 0.982   |
| CAP                                 | 635(88.7)    | 263(88.6)                      | 372(88.8)                                                  | 0.924   |
| Extracorporeal membrane oxygenation | 36(4.2)      | 15(5.1)                        | 21(5.0)                                                    | 0.981   |
| 30-day mortality                    | 162(22.6)    | 66(22.2)                       | 96(22.9)                                                   | 0.828   |
| 90-day mortality                    | 186(26.0)    | 76(25.6)                       | 110(26.3)                                                  | 0.842   |

\* other immunosuppressants: methotrexate, cyclosporine, cyclophosphamide, tacrolimus, sirolimus, and azathioprine.

\*\*Connective tissue disorders: rheumatoid arthritis, systemic lupus erythematosus, dermatomyositis, polymyositis, systemic sclerosis, Sjogren's syndrome, etc. @ Immunosuppressive drugs: glucocorticoid, tacrolimus, sirolimus, cyclosporine, methotrexate, etc.

†Other immunocompromised hosts: eczema, myelitis, autoimmune encephalitis, idiopathic thrombocytopenic purpura, etc.

MDR bacteria and CMV were more commonly identified in patients with hospital-acquired pneumonias (HAPs) than in those with community-acquired pneumonias (CAPs) ( $P < 0.05$ ) (Table 2). For CAPs, more pathogens were detected in patients with persistent lymphocytopenia than in patients without lymphocytopenia ( $P < 0.05$ ), including *Pneumocystis*, influenza A virus, CMV, and MDR bacteria. Patients on high-dose corticosteroids developed pneumonia more frequently than those on low-dose corticosteroids in both the CAP and HAP groups, with more frequent identification of *Klebsiella pneumoniae*, MDR bacteria, *Pneumocystis*, CMV, and *Mycobacterium tuberculosis* in patients on high-dose corticosteroids than in patients on low-dose corticosteroids in the CAP group ( $P < 0.05$ ). Pathogen positivity rates were higher, and MDR bacteria were more commonly identified in nonsurvivors than in survivors of CAPs or HAPs ( $P < 0.05$ ) (Tables 2 and 3). For non-CMV viral pneumonias, respiratory syncytial virus (RSV, 64 strains) was detected most frequently, followed by influenza A virus (62 strains), human parainfluenza virus (HPIV, 20 strains), influenza B virus (20 strains), human rhinovirus (HRV, eight strains), herpes simplex virus type 1 (HSV-1, four strains), and adenovirus (ADV, nine strains) (Table 2).

1  
2  
3  
4  
5  
6  
7  
8  
9  
10  
11  
12  
13  
14  
15  
16  
17  
18  
19  
20  
21  
22  
23  
24  
25  
26  
27  
28  
29  
30  
31  
32  
33  
34  
35  
36  
37  
38  
39  
40  
41  
42  
43  
44  
45  
46

**Table 2** The pathogen results of glucocorticoid users with community-acquired pneumonias according to different subgroup

For peer review only

1  
2  
3  
4  
5  
6  
7  
8  
9  
10  
11  
12  
13  
14  
15  
16  
17  
18  
19  
20  
21  
22  
23  
24  
25  
26  
27  
28  
29  
30  
31  
32  
33  
34  
35  
36  
37  
38  
39  
40  
41  
42  
43  
44  
45  
46

| Variables, n (%)                     | CAP, N=635 | HAP, N=81  | Simple glucocorticoid users, N=263 | Glucocorticoid with immunosuppressants users, N=372 | Patients discharged alive, N=479 | Patients died during hospitalization, N=156 | Persistent lymphocyte group, N=264 | Non-lymphocytopenia group, N=371 | Patients use high-dose steroids, N=219 | Patients use low-dose steroids, N=416 |
|--------------------------------------|------------|------------|------------------------------------|-----------------------------------------------------|----------------------------------|---------------------------------------------|------------------------------------|----------------------------------|----------------------------------------|---------------------------------------|
| Total pathogenic positive rate       | 438(69.0)  | 62(76.5)   | 190(72.2)                          | 248(66.7)                                           | 321(67.0)                        | 117(75.0)                                   | 190(72.0)                          | 248(66.8)                        | 181(82.6)                              | 257(61.8) #                           |
| Pathogens covered by CAP therapy     | 167(26.3)  | 24(29.6)   | 79(30.3)                           | 88(23.7)                                            | 126(26.3)                        | 41(26.3)                                    | 77(29.2)                           | 90(24.3)                         | 70(32.0)                               | 97(23.3) *                            |
| <i>Streptococcus pneumoniae</i>      | 6(0.9)     | 0(0)       | 2(0.8)                             | 4(1.1)                                              | 6(1.3)                           | 0(0)                                        | 2(0.8)                             | 4(1.1)                           | 1(0.5)                                 | 5(1.2)                                |
| <i>Haemophilus influenzae</i>        | 2(0.3)     | 0(0)       | 1(0.4)                             | 1(0.3)                                              | 2(0.4)                           | 0(0)                                        | 1(0.4)                             | 1(0.3)                           | 2(0.9)                                 | 0(0)                                  |
| <i>Staphylococcus aureus</i>         | 18(2.8)    | 5(6.2)     | 10(3.8)                            | 8(2.2)                                              | 13(2.7)                          | 5(3.2)                                      | 10(3.8)                            | 8(2.2)                           | 7(3.2)                                 | 11(2.6)                               |
| <i>Escherichia coli</i>              | 16(2.5)    | 3(3.7)     | 6(2.3)                             | 10(2.7)                                             | 12(2.5)                          | 4(2.6)                                      | 7(2.7)                             | 9(2.4)                           | 6(2.7)                                 | 10(2.4)                               |
| <i>Enterobacter aerogenes</i>        | 2(0.3)     | 0(0)       | 0(0)                               | 2(0.5)                                              | 1(0.2)                           | 1(0.6)                                      | 1(0.4)                             | 1(0.3)                           | 0(0)                                   | 2(0.5)                                |
| <i>Enterobacter cloacae</i>          | 7(1.1)     | 3(3.7)     | 3(1.1)                             | 4(1.1)                                              | 5(1.0)                           | 2(1.3)                                      | 2(0.8)                             | 5(1.3)                           | 4(1.8)                                 | 3(0.7)                                |
| <i>Klebsiella pneumoniae</i>         | 43(6.8)    | 4(4.9)     | 25(9.5)                            | 18(4.8)                                             | 29(6.1)                          | 14(9.0)                                     | 20(7.6)                            | 23(6.2)                          | 21(9.6)                                | 22(5.3) *                             |
| <i>Pseudomonas</i>                   | 57(9.0)    | 9(11.1)    | 28(10.6)                           | 29(7.8)                                             | 42(8.8)                          | 15(9.6)                                     | 28(10.6)                           | 29(7.8)                          | 24(11.0)                               | 33(7.9)                               |
| <i>Proteus mirabilis</i>             | 3(0.5)     | 0(0)       | 1(0.4)                             | 2(0.5)                                              | 3(0.6)                           | 0(0)                                        | 3(1.1)                             | 0(0)                             | 2(0.9)                                 | 1(0.2)                                |
| <i>Mycoplasma pneumoniae</i>         | 6(0.9)     | 0(0)       | 1(0.4)                             | 5(1.3)                                              | 6(1.3)                           | 0(0)                                        | 1(0.4)                             | 5(1.3)                           | 2(0.9)                                 | 4(1.0)                                |
| <i>Legionella</i>                    | 7(1.1)     | 0(0)       | 2(0.8)                             | 5(1.3)                                              | 7(1.5)                           | 0(0.6)                                      | 2(0.8)                             | 5(1.3)                           | 1(0.5)                                 | 6(1.4)                                |
| Pathogens not covered by CAP therapy | 98(15.4)   | 24(29.6) # | 37(14.1)                           | 61(16.4)                                            | 50(10.4)                         | 48(30.8) #                                  | 47(17.8)                           | 51(13.7)                         | 35(16.0)                               | 63(15.1)                              |
| <i>Acinetobacter</i>                 | 45(7.1)    | 15(18.5) # | 18(6.8)                            | 27(7.3)                                             | 22(4.6)                          | 23(14.7) #                                  | 27(10.2)                           | 18(4.9)                          | 14(6.4)                                | 31(7.5)                               |
| <i>Burkholderia</i>                  | 17(2.7)    | 2(2.5)     | 7(2.7)                             | 10(2.7)                                             | 3(0.6)                           | 14(9.0) #                                   | 6(2.3)                             | 11(3.0)                          | 9(4.1)                                 | 8(1.9)                                |
| <i>Enterococcus</i>                  | 12(1.9)    | 2(2.5)     | 2(0.8)                             | 10(2.7)                                             | 7(1.5)                           | 5(3.2)                                      | 2(0.8)                             | 10(2.7)                          | 3(1.4)                                 | 9(2.2)                                |
| <i>Stenotrophomonas maltophilia</i>  | 13(2.0)    | 2(2.5)     | 5(1.9)                             | 8(2.2)                                              | 10(2.1)                          | 3(1.9)                                      | 7(1.5)                             | 6(1.6)                           | 4(1.8)                                 | 9(2.2)                                |
| <i>Nocardia</i>                      | 8(1.3)     | 0(0)       | 4(1.5)                             | 4(1.1)                                              | 6(1.3)                           | 2(1.3)                                      | 4(1.5)                             | 4(1.1)                           | 4(1.8)                                 | 4(1.0)                                |
| <i>Corynebacterium striatum</i>      | 1(0.2)     | 2(2.5)     | 1(0.4)                             | 0(0)                                                | 1(0.2)                           | 0(0)                                        | 0(0)                               | 1(0.6)                           | 0(0)                                   | 1(0.2)                                |
| <i>Comamonas acidovorans</i>         | 1(0.2)     | 1(1.2)     | 0(0)                               | 1(0.3)                                              | 0(0)                             | 1(0.6)                                      | 1(0.4)                             | 0(0)                             | 1(0.5)                                 | 0(0)                                  |
| <i>Cupriavidus pauculus</i>          | 1(0.2)     | 0(0)       | 0(0)                               | 1(0.3)                                              | 1(0.2)                           | 0(0)                                        | 0(0)                               | 1(0.3)                           | 0(0)                                   | 1(0.2)                                |

|    |                                              |            |            |            |            |            |            |            |             |            |             |
|----|----------------------------------------------|------------|------------|------------|------------|------------|------------|------------|-------------|------------|-------------|
| 1  |                                              |            |            |            |            |            |            |            |             |            |             |
| 2  |                                              |            |            |            |            |            |            |            |             |            |             |
| 3  |                                              |            |            |            |            |            |            |            |             |            |             |
| 4  |                                              |            |            |            |            |            |            |            |             |            |             |
| 5  | Multidrug resistance bacteria/ bacteria      | 108(17.0)  | 40(49.4) # | 68(13.3)   | 40(10.8)   | 57(11.9)   | 51(32.7) # | 61(23.1)   | 47(12.7) #  | 51(23.3)   | 57(13.7) #  |
| 6  | Fungus                                       | 212(33.3)  | 34(42.0)   | 80(30.4)   | 132(35.5)  | 141(29.4)  | 71(45.5) # | 109(41.3)  | 103(27.8) # | 105(47.9)  | 107(25.7) # |
| 7  | <i>Pneumocystis</i>                          | 128(20.2)  | 21(25.9)   | 48(18.3)   | 80(21.5)   | 88(18.4)   | 40(25.6) * | 70(26.5)   | 58(15.6) #  | 71(32.4)   | 57(13.7) #  |
| 8  | <i>Aspergillus</i>                           | 81(12.8)   | 13(16.0)   | 32(12.2)   | 49(13.2)   | 52(10.9)   | 29(18.6) * | 38(14.4)   | 43(11.6)    | 33(15.1)   | 48(11.5)    |
| 9  | <i>Rhizopus/ Trichoderma</i>                 | 2(0.3)     | 0(0)       | 0(0)       | 2(0.5)     | 0(0)       | 2(1.3)     | 1(0.4)     | 1(0.3)      | 1(0.5)     | 1(0.2)      |
| 10 | <i>Cryptococcus</i>                          | 1(0.2)     | 0(0)       | 0(0)       | 1(0.3)     | 1(0.2)     | 0(0)       | 0(0)       | 1(0.3)      | 0(0)       | 1(0.2)      |
| 11 | Virus                                        | 355(55.9)  | 51(63.0)   | 154(58.6)  | 201(54.0)  | 257(53.7)  | 98(62.8) * | 167(63.3)  | 188(50.7) # | 132(60.3)  | 223(53.6)   |
| 12 | Cytomegalovirus                              | 186(29.3)  | 33(40.7) * | 79(30.0)   | 107(28.8)  | 133(27.8)  | 53(34.0)   | 93(35.2)   | 93(25.1) #  | 84(38.4)   | 102(24.5) # |
| 13 | Influenza A virus                            | 55(8.7)    | 7(8.6)     | 29(11.0)   | 26(7.0)    | 36(7.5)    | 19(12.2)   | 30(11.4)   | 25(6.7) *   | 15(6.8)    | 40(9.6)     |
| 14 | Influenza B virus                            | 19(3.0)    | 1(1.2)     | 7(2.7)     | 12(3.2)    | 15(3.1)    | 4(2.6)     | 9(3.4)     | 10(2.7)     | 9(4.1)     | 10(2.4)     |
| 15 | Rhinovirus                                   | 8(1.3)     | 0(0)       | 2(0.8)     | 6(1.6)     | 5(1.0)     | 3(1.9)     | 5(1.9)     | 3(0.8)      | 2(0.9)     | 6(1.4)      |
| 16 | Respiratory syncytial virus                  | 56(8.8)    | 8(9.9)     | 27(10.3)   | 29(7.8)    | 45(9.4)    | 11(7.1)    | 18(6.8)    | 38(10.2) *  | 14(6.4)    | 42(10.1)    |
| 17 | Adenovirus                                   | 9(1.4)     | 0(0)       | 4(1.5)     | 5(1.3)     | 8(1.7)     | 1(0.6)     | 2(0.8)     | 7(1.9)      | 2(0.9)     | 7(1.7)      |
| 18 | Parainfluenza virus                          | 18(2.8)    | 2(2.5)     | 5(1.9)     | 13(3.5)    | 12(2.5)    | 6(3.8)     | 6(2.3)     | 12(3.2)     | 4(1.8)     | 14(3.4)     |
| 19 | Herpes simplex virus type 1                  | 4(0.6)     | 0(0)       | 1(0.4)     | 3(0.8)     | 3(0.6)     | 1(0.6)     | 4(1.5)     | 0(0)        | 2(0.9)     | 2(0.5)      |
| 20 | Mycobacterium tuberculosis                   | 12(1.9)    | 0(0)       | 3(1.1)     | 9(2.4)     | 10(2.1)    | 2(1.3)     | 5(1.9)     | 7(1.9)      | 8(3.7)     | 4(1.0) *    |
| 21 | Nontuberculosis mycobacteria                 | 3(0.5)     | 0(0)       | 3(1.1)     | 0(0)       | 1(0.2)     | 2(1.3)     | 3(1.1)     | 0(0)        | 1(0.5)     | 2(0.5)      |
| 22 | Pathogenic types in different groups (Total) | 847(133.4) | 133(164.2) | 356(135.4) | 491(132.0) | 585(122.1) | 262(167.9) | 408(154.5) | 439(118.3)  | 351(160.3) | 496(119.2)  |

#:P&lt;0.01, \*:P&lt;0.05

**Table 3** The pathogen testing result of glucocorticoid users with hospital-acquired pneumonia in different subgroup

| Variables, n (%)                        | Patients<br>discharged alive,<br>N=51 | Patients died<br>during<br>hospitalization,<br>N=30 | Persistent<br>lymphocyte<br>nia group,<br>N=40 | Non-<br>lymphocytopenia<br>group, N=41 | Patients use high-<br>dose steroids,<br>N=30 | Patients use low-<br>dose steroids,<br>N=51 |
|-----------------------------------------|---------------------------------------|-----------------------------------------------------|------------------------------------------------|----------------------------------------|----------------------------------------------|---------------------------------------------|
| Total pathogenic positive rate          | 34(66.7)                              | 28(93.3) #                                          | 33(82.5)                                       | 29(70.7)                               | 27(90.0)                                     | 35(68.6) *                                  |
| Bacteria                                | 22(43.1)                              | 26(86.7) #                                          | 23(57.5)                                       | 25(61.0)                               | 21(70.0)                                     | 27(52.9)                                    |
| <i>Staphylococcus aureus</i>            | 2(3.9)                                | 3(10.0)                                             | 2(5.0)                                         | 3(7.3)                                 | 3(10.0)                                      | 2(3.9)                                      |
| <i>Escherichia coli</i>                 | 2(3.9)                                | 1(3.3)                                              | 0(0)                                           | 3(7.3)                                 | 2(6.7)                                       | 1(2.0)                                      |
| <i>Enterobacter cloacae</i>             | 0(0)                                  | 3(10.0) *                                           | 1(2.5)                                         | 2(4.9)                                 | 1(3.3)                                       | 2(3.9)                                      |
| <i>Klebsiella pneumoniae</i>            | 1(2.0)                                | 3(10.0)                                             | 2(5.0)                                         | 2(4.9)                                 | 2(6.7)                                       | 2(3.9)                                      |
| <i>Pseudomonas</i>                      | 3(5.9)                                | 6(20.0)                                             | 5(12.5)                                        | 4(9.8)                                 | 3(10.0)                                      | 6(11.8)                                     |
| <i>Acinetobacter</i>                    | 8(15.7)                               | 7(23.3)                                             | 8(20.0)                                        | 7(17.1)                                | 5(16.7)                                      | 10(19.6)                                    |
| <i>Burkholderia</i>                     | 1(2.0)                                | 1(3.3)                                              | 1(2.5)                                         | 1(2.4)                                 | 1(3.3)                                       | 1(2.0)                                      |
| <i>Enterococcus</i>                     | 2(3.9)                                | 0(0)                                                | 2(5.0)                                         | 0(0)                                   | 1(3.3)                                       | 1(2.0)                                      |
| <i>Stenotrophomonas maltophilia</i>     | 2(3.9)                                | 0(0)                                                | 1(2.5)                                         | 1(2.4)                                 | 2(6.7)                                       | 0(0)                                        |
| <i>Others bacteria</i>                  | 1(2.0)                                | 2(6.7)                                              | 1(2.5)                                         | 2(4.9)                                 | 1(3.3)                                       | 2(3.9)                                      |
| Multidrug resistance bacteria/ bacteria | 11(21.6)                              | 13(43.3) *                                          | 13(32.5)                                       | 11(26.8)                               | 8(26.7)                                      | 16(31.4)                                    |
| Fungus                                  | 21(41.2)                              | 13(43.3)                                            | 21(52.5)                                       | 13(31.7)                               | 14(46.7)                                     | 20(39.2)                                    |
| <i>Pneumocystis</i>                     | 15(29.4)                              | 6(20.0)                                             | 14(35.0)                                       | 7(17.1)                                | 10(33.3)                                     | 11(21.6)                                    |
| <i>Aspergillus</i>                      | 6(11.8)                               | 7(23.3)                                             | 7(17.5)                                        | 6(14.6)                                | 4(13.3)                                      | 9(17.6)                                     |
| Virus                                   | 20(39.2)                              | 31(103.3) #                                         | 25(62.5)                                       | 26(63.4)                               | 20(66.7)                                     | 31(60.8)                                    |
| Cytomegalovirus                         | 16(31.4)                              | 17(56.7) *                                          | 18(45.0)                                       | 15(36.6)                               | 17(56.7)                                     | 16(31.4) *                                  |
| Influenza A virus                       | 1(2.0)                                | 6(20.0) #                                           | 5(12.5)                                        | 2(4.9)                                 | 2(6.7)                                       | 5(9.8)                                      |
| Influenza B virus                       | 0(0)                                  | 1(3.3)                                              | 1(2.5)                                         | 0(0)                                   | 0(0)                                         | 1(2.0)                                      |
| Respiratory syncytial virus             | 1(2.0)                                | 7(23.3) #                                           | 1(2.5)                                         | 7(17.1) *                              | 1(3.3)                                       | 7(13.7)                                     |
| Parainfluenza virus                     | 2(3.9)                                | 0(0)                                                | 0(0)                                           | 2(4.9)                                 | 0(0)                                         | 2(3.9)                                      |

1  
2  
3  
4  
5  
6  
7  
8  
9  
10  
11  
12  
13  
14  
15  
16  
17  
18  
19  
20  
21  
22  
23  
24  
25  
26  
27  
28  
29  
30  
31  
32  
33  
34  
35  
36  
37  
38  
39  
40  
41  
42  
43  
44  
45  
46

---

|                                              |           |           |           |           |           |           |
|----------------------------------------------|-----------|-----------|-----------|-----------|-----------|-----------|
| Pathogenic types in different groups (Total) | 63(123.5) | 70(233.3) | 69(172.5) | 64(156.1) | 55(183.3) | 78(152.9) |
|----------------------------------------------|-----------|-----------|-----------|-----------|-----------|-----------|

---

#:P<0.01, \*:P<0.05

For peer review only

Patients with non-CMV viral pneumonias had higher PaO<sub>2</sub>/FiO<sub>2</sub> ratios, lower rates of respiratory failure, and lower 30-day and 90-day mortality rates than patients with PCP or CMV pneumonias ( $P < 0.05$ ) (Table 4). There were more PCP and CMV pneumonias in patients with nephrotic syndrome or chronic glomerulonephritis and more *Aspergillus* and non-CMV viral pneumonias in the solid organ transplant group; however, there were no statistically significant differences in mortality rates between patients with different underlying diseases (Table 5).

Time analysis showed that 58.0% of patients developed pneumonia within 6 months of starting glucocorticoid therapy, with 74.0% of patients developing pneumonia within 1 year (Figure 2). Of confirmed PCP cases, 79.0% developed pneumonia within 6 months of starting glucocorticoid therapy, with 86.0% developing pneumonia within 1 year. Of confirmed CMV pneumonia cases, 71.0% developed pneumonia within 6 months of starting glucocorticoid therapy, with 82.0% developing pneumonia within 1 year (Figure 3). For non-CMV viral, *Aspergillus*, and bacterial pneumonias, most patients developed pneumonia within 6 months of starting glucocorticoid therapy, though less frequently than in patients with CMV pneumonia or PCP (Figure 2). The trends in the incidences of these pneumonia types were similar in patients treated with glucocorticoids and other immunosuppressants and in patients treated with glucocorticoids alone (Figures 3 and 4).

**Table 4 Comparative analysis of pneumocystis infection group and viral infection group**

| Variables                                        | Pneumocystis infection group, N=134 | Non-CMV viral infection group, N=157 | CMV viral infection group, N=95 | P-Value |
|--------------------------------------------------|-------------------------------------|--------------------------------------|---------------------------------|---------|
| Sex, female, n (%)                               | 65(48.5)                            | 56(35.7)                             | 32(33.7)                        | 0.033   |
| Age, median (IGR)                                | 56.0(45.8,65.0)                     | 60.0(52.0, 68.0)                     | 64.0(53.0, 71.0)                | <0.001  |
| Nephrotic syndrome or chronic glomerulonephritis | 38(28.4)                            | 10(6.4)                              | 13(13.7)                        | <0.001  |
| Solid organ transplant                           | 7(5.2)                              | 43(27.4)                             | 5(5.3)                          | <0.001  |
| Connective tissue disease                        | 58(44.0)                            | 50(33.1)                             | 43(46.3)                        | 0.051   |
| Interstitial lung disease                        | 49(36.6)                            | 95(60.5)                             | 42(44.2)                        | <0.001  |
| Idiopathic interstitial pneumonia                | 12(9.1)                             | 28(17.8)                             | 14(14.7)                        | 0.091   |
| Laboratory examination                           |                                     |                                      |                                 |         |
| White blood cell, ×10 <sup>9</sup> /L (IQR)      | 8.22 (5.50, 11.46)                  | 8.45 (5.94, 11.59)                   | 7.96(5.77, 12.65)               | 0.888   |
| Neutrophils, ×10 <sup>9</sup> /L (IQR)           | 7.12(4.66, 10.50)                   | 6.56 (4.47, 9.51)                    | 6.47(4.39, 10.77)               | 0.438   |
| Lymphocyte, ×10 <sup>9</sup> /L (IQR)            | 0.60 (0.40, 1.00)                   | 0.99 (0.60, 1.55)                    | 0.91(0.49, 1.57)                | <0.001  |



| Variables                                                           | Pneumocystis<br>infection group,<br>N=134 | Non-CMV viral<br>infection group,<br>N=157 | CMV viral<br>infection group,<br>N=95 | P-Value |
|---------------------------------------------------------------------|-------------------------------------------|--------------------------------------------|---------------------------------------|---------|
| Persistent lymphocytopenia                                          | 74(55.2)                                  | 62(39.5)                                   | 39(41.1)                              | 0.017   |
| Oxygenation index                                                   | 154.4(93.6, 251.4)                        | 295.2(171.3, 403.3)                        | 177.8(102.5,<br>321.0)                | <0.001  |
| Severe pneumonia index score                                        | 75.5(57.0,105.3)                          | 79.0(61.0, 98.0)                           | 89.0(68.0, 118.0)                     | 0.017   |
| CURB65 score>1                                                      | 39 (29.1)                                 | 46(29.3)                                   | 34(35.8)                              | 0.512   |
| Imaging features, n (%), 35missing                                  |                                           |                                            |                                       |         |
| Consolidation or mass                                               | 57(42.5)                                  | 66(42.0)                                   | 41(43.2)                              | 0.547   |
| Ground-glass opacity                                                | 102(76.1)                                 | 83(52.9)                                   | 51(53.7)                              | <0.001  |
| Treatment, before admission, n (%)                                  |                                           |                                            |                                       |         |
| High-dose steroids(>30mg/day)                                       | 73(54.5)                                  | 39(24.8)                                   | 41(43.2)                              | <0.001  |
| Accumulated dose of glucocorticoids,<br>methylprednisolone, g (IQR) | 3.3(2.2, 5.8)                             | 2.9(1.2, 6.8)                              | 4.0(2.1, 7.4)                         | 0.186   |
| Time of steroids use (month)                                        | 3.0(2.0, 5.0)                             | 5.0(2.0, 16.0)                             | 4.0(2.0, 12.0)                        | 0.291   |
| Receiving other immunosuppressants                                  | 58(43.3)                                  | 67(42.7)                                   | 45(47.4)                              | 0.749   |
| Complications, n (%)                                                |                                           |                                            |                                       |         |
| Noninvasive ventilation                                             | 51(38.1)                                  | 29(18.5)                                   | 29(30.5)                              | 0.001   |
| Invasive mechanical ventilation                                     | 41(30.6)                                  | 43(27.4)                                   | 27(28.4)                              | 0.831   |
| Respiratory failure                                                 | 104(77.6)                                 | 69(43.9)                                   | 55(57.9)                              | <0.001  |
| ICU care                                                            | 84(62.7)                                  | 52(33.1)                                   | 49(51.6)                              | <0.001  |
| Septic shock                                                        | 38(28.4)                                  | 40(25.5)                                   | 22(23.2)                              | 0.667   |
| Extracorporeal membrane oxygenation                                 | 6(4.5)                                    | 17(10.8)                                   | 6(6.3)                                | 0.108   |
| 30-day mortality                                                    | 45(33.6)                                  | 32(20.4)                                   | 23(24.2)                              | 0.034   |
| 90-day mortality                                                    | 51(38.1)                                  | 38(24.2)                                   | 26(27.4)                              | 0.030   |

Non-CMV virus: respiratory syncytial virus (RSV), influenza A virus, influenza B virus, human parainfluenza virus (HPIV), human rhinovirus (HRV), and adenovirus.

**Table 5** Clinical characteristics of pneumonia with glucocorticoid users in different underlying disease

| Variables                               | Connective tissue disease, N=368 | Nephrotic syndrome or chronic glomerulonephritis, N=90 | Solid organ transplant, N=63 | Bone marrow or HSCT, N=7 | Lymphoma, N=17    | Bronchial asthma or COPD, N=30 | Idiopathic interstitial pneumonia, N=73 | Radiation pneumonitis, N=8 | P value |
|-----------------------------------------|----------------------------------|--------------------------------------------------------|------------------------------|--------------------------|-------------------|--------------------------------|-----------------------------------------|----------------------------|---------|
| Sex, female, n (%)                      | 228(62.0)                        | 28(31.1)                                               | 15(23.8)                     | 1(14.3)                  | 4(23.5)           | 9(30.0)                        | 28(38.4)                                | 0(0)                       | <0.001  |
| Age, median (IQR)                       | 60.0(47.3,69.8)                  | 57.0(41.8, 66.0)                                       | 56.0(46.0, 63.0)             | 33.0(32.0, 53.0)         | 65.0(53.5, 75.0)  | 62.0(57.0, 73.3)               | 65.0(55.0,71.0)                         | 62.5(52.0, 66.8)           | <0.001  |
| Laboratory examination                  |                                  |                                                        |                              |                          |                   |                                |                                         |                            |         |
| White blood cell, $\times 10^9/L$ (IQR) | 7.79 (5.72, 11.19)               | 8.31 (6.47, 11.81)                                     | 6.92(4.45, 9.93)             | 5.27(3.80, 11.6)         | 5.16(2.85, 9.23)  | 9.42(6.59, 12.82)              | 9.58(7.15, 12.91)                       | 6.95(5.52, 10.82)          | 0.001   |
| Neutrophils, $\times 10^9/L$ (IQR)      | 6.36(4.29, 9.80)                 | 7.48 (5.30, 10.81)                                     | 4.80(3.2, 7.7)               | 3.85(0.90, 7.05)         | 3.52(1.89, 7.91)  | 6.94(4.45, 9.13)               | 8.13(4.87, 11.07)                       | 6.16(5.20, 9.50)           | <0.001  |
| Lymphocyte, $\times 10^9/L$ (IQR)       | 0.83 (0.50, 1.34)                | 0.77 (0.40, 1.22)                                      | 0.80(0.33, 1.31)             | 0.61(0.43, 2.07)         | 0.86(0.38, 1.42)  | 1.15(0.76, 1.73)               | 1.10(0.70, 1.61)                        | 0.50(0.09, 0.94)           | 0.014   |
| Persistent lymphocytopenia              | 160(43.5)                        | 39(43.3)                                               | 29(46.0)                     | 3(42.9)                  | 8(47.1)           | 8(26.7)                        | 29(39.7)                                | 5                          | 0.634   |
| Oxygenation index                       | 243.1(126.6, 343.8)              | 176.5(103.4, 279.0)                                    | 323.8(207.1, 424.5)          | 265.5(148.8, 304.7)      | 197.8(80.0,350.7) | 264.6(181.6, 444.0)            | 242.9(128.0, 364.3)                     | 307.4(244.1, 442.0)        | 0.001   |
| Severe pneumonia index score            | 73.0(54.0,96.0)                  | 88.0(67.8, 113.5)                                      | 83.0(64.0, 100.0)            | 64.0(42.0, 86.0)         | 96.0(73.5, 141.5) | 74.5(60.8, 92.5)               | 75.0(63.0, 96.5)                        | 91.5(85.0, 131.0)          | <0.001  |
| CURB65 score>1                          | 105 (28.5)                       | 34(37.8)                                               | 15(23.8)                     | 1(14.3)                  | 4(23.5)           | 6(20.0)                        | 25(34.2)                                | 2(25.0)                    | 0.391   |
| Imaging features, n (%)                 |                                  |                                                        |                              |                          |                   |                                |                                         |                            |         |
| Consolidation or mass                   | 163(51.6)                        | 41(55.4)                                               | 23(37.7)                     | 3(60.0)                  | 5(38.5)           | 7(23.3)                        | 19(28.4)                                | 5(83.3)                    | 0.005   |
| Ground-glass opacity                    | 203(64.2)                        | 50(67.6)                                               | 29(47.5)                     | 2(40.0)                  | 8(61.5)           | 16(53.3)                       | 51(76.1)                                | 4(66.7)                    | 0.04    |
| Total pathogenic positive rate          |                                  |                                                        |                              |                          |                   |                                |                                         |                            |         |
| Bacteria                                | 104(28.3)                        | 29(32.2)                                               | 31(49.2)                     | 2(28.6)                  | 2(11.8)           | 11(36.7)                       | 18(24.7)                                | 4(50.0)                    | 0.015   |
| PCP                                     | 63(17.1)                         | 40(44.4)                                               | 10(15.9)                     | 0(0)                     | 4(23.5)           | 3(10.0)                        | 12(16.4)                                | 3(37.5)                    | <0.001  |
| Aspergillus                             | 33(9.0)                          | 9(10.0)                                                | 26(41.3)                     | 0(0)                     | 1(5.9)            | 5(16.7)                        | 10(13.7)                                | 2(25.0)                    | <0.001  |
| CMV                                     | 85(23.1)                         | 41(45.6)                                               | 15(23.8)                     | 3(42.9)                  | 8(47.1)           | 4(13.3)                        | 26(35.6)                                | 5(62.5)                    | <0.001  |
| Non-CMV virus                           | 56(15.2)                         | 12(13.3)                                               | 47(74.6)                     | 2(28.6)                  | 4(23.5)           | 3(10.0)                        | 28(38.4)                                | 1(12.5)                    | <0.001  |

| Variables                                                        | Connective tissue disease, N=368 | Nephrotic syndrome or chronic glomerulonephritis, N=90 | Solid organ transplant, N=63 | Bone marrow or HSCT, N=7 | Lymphoma, N=17 | Bronchial asthma or COPD, N=30 | Idiopathic interstitial pneumonia, N=73 | Radiation pneumonitis, N=8 | <i>P</i> value |
|------------------------------------------------------------------|----------------------------------|--------------------------------------------------------|------------------------------|--------------------------|----------------|--------------------------------|-----------------------------------------|----------------------------|----------------|
| Treatment, before admission, n (%)                               |                                  |                                                        |                              |                          |                |                                |                                         |                            |                |
| High-dose steroids use                                           | 140(38.0)                        | 32(35.6)                                               | 3(4.8)                       | 1(14.3)                  | 9(52.9)        | 7(23.3)                        | 27(37.0)                                | 3(37.5)                    | <0.001         |
| Accumulated dose of glucocorticoids, methylprednisolone, g (IQR) | 5.4(2.4, 13.7)                   | 3.8(2.5, 6.6)                                          | 1.9(0.9, 3.3)                | 1.3(0.6, 7.3)            | 2.9(2.4, 36)   | 0.6(0.3, 2.4)                  | 3.6(2.0, 6.5)                           | 5.9(3.1, 6.7)              | <0.001         |
| Time of steroids use (month)                                     | 5.9(2.0, 29.8)                   | 3.0(3.0, 11.0)                                         | 7.0(2.0, 15.0)               | 6.0(3.0, 18.0)           | 3.5(2.0, 5.0)  | 1.0(1.0, 13.5)                 | 3.5(2.0, 12.0)                          | 3.0(2.0, 8.0)              | 0.024          |
| Receiving other immunosuppressants                               | 257(69.8)                        | 48(53.3)                                               | 63(100.0)                    | 6                        | 9(52.9)        | 0(0)                           | 17(23.3)                                | 1(12.5)                    | <0.001         |
| Complications, n (%)                                             |                                  |                                                        |                              |                          |                |                                |                                         |                            |                |
| Noninvasive ventilation                                          | 98(26.6)                         | 25(27.8)                                               | 8(12.7)                      | 1(14.3)                  | 4(23.5)        | 3(10.0)                        | 19(26.0)                                | 2(25.0)                    | 0.183          |
| Invasive mechanical ventilation                                  | 89(24.2)                         | 25(27.8)                                               | 10(15.9)                     | 1(14.3)                  | 4(23.5)        | 6(20.0)                        | 24(32.9)                                | 0(0)                       | 0.237          |
| Respiratory failure                                              | 179(48.6)                        | 58(64.4)                                               | 24(38.1)                     | 3(42.9)                  | 6(35.3)        | 14(46.7)                       | 41(56.2)                                | 3(37.5)                    | 0.040          |
| ICU care                                                         | 152(41.3)                        | 49(54.4)                                               | 14(22.2)                     | 3(42.9)                  | 6(35.3)        | 6(20.0)                        | 35(47.9)                                | 1(12.5)                    | 0.001          |
| Septic shock                                                     | 68(18.5)                         | 25(27.8)                                               | 15(23.8)                     | 2(28.6)                  | 4(23.5)        | 5(16.7)                        | 20(27.4)                                | 2(25.0)                    | 0.481          |
| Extracorporeal membrane oxygenation                              | 15(4.1)                          | 4(4.4)                                                 | 4(6.3)                       | 0(0)                     | 1(5.9)         | 0(0)                           | 10(13.7)                                | 0(0)                       | 0.044          |
| 30-day mortality                                                 | 88(23.9)                         | 23(25.6)                                               | 8(12.7)                      | 2(28.6)                  | 3(17.6)        | 4(13.3)                        | 17(23.3)                                | 2(25.0)                    | 0.509          |
| 90-day mortality                                                 | 103(28.0)                        | 25(27.8)                                               | 9(14.3)                      | 2(28.6)                  | 4(23.5)        | 6(20.0)                        | 20(27.4)                                | 2(25.0)                    | 0.528          |

HSCT: hematopoietic stem cell transplant; COPD: chronic obstructive pulmonary disease

Cox regression analysis indicated that the following factors were independent predictors of 30-day and 90-day mortality in patients with CAP treated with glucocorticoids and other immunosuppressants and in patients with CAP treated with glucocorticoids only: septic shock, respiratory failure, and persistent lymphocytopenia. In the glucocorticoid-only group, high-dose corticosteroid use and invasive mechanical ventilation were independent negative predictors of 90-day mortality (Table 6). Interstitial lung disease and mechanical ventilation were independent negative predictors of 90-day mortality in the glucocorticoid and immunosuppressant group (Table 7).

**Table 6** Cox regression analysis of prognostic factors in glucocorticoid users with community-acquired pneumonia patients

| Variables                       | 30-day mortality |              |         | 90-day mortality |              |         |
|---------------------------------|------------------|--------------|---------|------------------|--------------|---------|
|                                 | OR               | 95%CI        | P value | OR               | 95%CI        | P value |
| Septic shock                    | 5.874            | 3.210-10.750 | <0.001  | 4.900            | 2.685-8.941  | <0.001  |
| Respiratory failure             | 8.625            | 2.580-28.832 | <0.001  | 8.757            | 2.554-30.024 | 0.001   |
| Persistent lymphocytopenia      | 2.069            | 1.183-3.621  | 0.011   | 1.757            | 1.049-2.941  | 0.032   |
| Invasive mechanical ventilation | -                | -            | -       | 2.240            | 1.251-4.010  | 0.007   |
| High-dose steroids              | 1.989            | 1.145-3.456  | 0.015   | -                | -            | -       |

**Table 7** Cox regression analysis of prognostic factors in glucocorticoid and immunosuppressants users with community-acquired pneumonia patients

| Variables                  | 30-day mortality |               |         | 90-day mortality |               |         |
|----------------------------|------------------|---------------|---------|------------------|---------------|---------|
|                            | OR               | 95%CI         | P value | OR               | 95%CI         | P value |
| Septic shock               | 4.438            | 2.783-7.077   | <0.001  | 4.030            | 2.549-6.370   | <0.001  |
| Interstitial lung disease  | -                | -             | -       | 1.678            | 1.099-2.562   | 0.017   |
| Respiratory failure        | 48.238           | 6.568-354.301 | <0.001  | 35.106           | 4.560-270.244 | 0.001   |
| Persistent lymphocytopenia | 1.714            | 1.046-2.810   | 0.033   | 1.648            | 1.047-2.594   | 0.031   |
| Mechanical ventilation     |                  |               |         | 1.949            | 1.031-3.685   | 0.040   |

## DISCUSSION

This study was the first large-scale retrospective investigation of the aetiology and prognostic risk factors of pneumonia in patients using glucocorticoids. The main findings of the present study are summarised as follows: (1) more than 60% of patients developed pneumonia within 6 months of glucocorticoid therapy initiation, especially for PCP and CMV pneumonias; (2) persistent lymphocytopenia was associated with significantly higher rates of infection by opportunistic pathogens, mixed pathogen types, and MDR bacteria; (3) patients using high-dose glucocorticoids were significantly more likely to develop opportunistic pneumonias than those using low-dose glucocorticoids; (4) 30-day and 90-day mortality rates of patients with non-CMV and CMV viral pneumonias were similar, though lower than those with PCP; (5) septic shock, respiratory failure, mechanical ventilation, interstitial lung disease, and persistent lymphocytopenia were independent predictors of 90-day mortality in patients receiving glucocorticoids.

Use of glucocorticoids and other immunosuppressive agents have been shown to increase risk of infections caused by CMV, *Pneumocystis*, *Aspergillus*, and other opportunistic pathogens.[18-23] A review of 33 pneumonia patients undergoing long-term glucocorticoid therapy showed that *Staphylococcus aureus* was the most common pathogen identified, with a wide range of other causative pathogens, including bacteria, fungi, viruses, *Pneumocystis*, and *Mycobacterium*. [1] In an international multicentre study of immunocompromised patients, chronic steroid users accounted for 45% of patients,[24] with the main causative pathogens for pneumonia including *Streptococcus pneumoniae*, *Pseudomonas aeruginosa*, *Klebsiella pneumoniae*, *Staphylococcus aureus*, influenza viruses, and *Pneumocystis*. In our study, the most common pathogens isolated were bacteria, CMV, non-CMV viruses, *Pneumocystis*, *Aspergillus* or *Cryptococcus*, *Mycoplasma pneumoniae* or *Legionella*, and *Mycobacterium tuberculosis* or nontuberculous *Mycobacteria*. For bacterial pneumonias, *Pseudomonas aeruginosa*, *Acinetobacter baumannii*, *Klebsiella pneumoniae*, and *Staphylococcus aureus* were most commonly identified, possibly due to antibiotic therapy before admission. In some patients, BALs or sputum sampling occurred more than 48 hours after admission, increasing the risk of nosocomial aetiologies for pneumonia, including infection with *Acinetobacter baumannii*.

An association between mixed pulmonary infections and treatment with glucocorticoids for

1  
2  
3  
4 nephrotic syndrome, lung transplantation, or other disorders requiring immunosuppression has  
5 previously been reported. [25-27] We found mixed infections in more than 50% of our study  
6 patients. Glucocorticoid use may also be a risk factor for MDR bacterial infections. We  
7 demonstrated that MDR bacterial infections were significantly more common in patients treated  
8 with high-dose steroids and in patients with persistent lymphocytopenia. Therefore, MDR  
9 pathogens must be considered when selecting antimicrobial agents for pneumonia in patients who  
10 are receiving high-dose steroids or in those with persistent lymphocytopenia.

11  
12  
13  
14  
15  
16  
17 A low CD4<sup>+</sup> T-lymphocyte count has previously been shown to be associated with PCP.[28-  
18 29] Moreover, a low absolute lymphocyte count and prolonged high-dose steroid therapy have  
19 also been shown to be predictors of PCP and CMV infections.[30-36] Yang et al. demonstrated  
20 that the average time until diagnosis of PCP was only 2.4 months after immunosuppressant  
21 initiation in patients with glomerulonephritis.[37] Our results underscore the importance of  
22 considering PCP in the differential diagnosis of patients receiving chronic high-dose  
23 glucocorticoids. This study also indicated that high-dose glucocorticoid use is associated with  
24 *Mycobacterium tuberculosis* and *Aspergillus* pneumonias. It has been shown that glucocorticoids  
25 have profound effects on the distribution and function of immune cells, including a decrease in  
26 macrophage antifungal activity through inhibition of reactive oxidant intermediates and direct  
27 stimulation of growth of *Aspergillus fumigatus*. [38]

28  
29  
30  
31  
32  
33  
34  
35  
36  
37  
38  
39 Respiratory viruses have also been recognised to be potential causes for pneumonia and death  
40 in immunocompromised individuals with haematologic malignancies and those undergoing  
41 haematopoietic stem cell transplants. Jacobs et al. found a 25% overall 30-day mortality in 32  
42 patients with haematologic malignancies and human rhinovirus lower respiratory tract  
43 infections.[39] A slightly higher mortality rate (27%) was observed in a study by Shah of patients  
44 with lower respiratory tract infections caused by parainfluenza virus who were undergoing  
45 haematopoietic cell transplants or had haematologic malignancies.[40] Chatzis et al. showed that  
46 21.3% of an immunocompromised adult cohort with RSV pneumonia required ICU transfer, with  
47 nearly a 20% mortality rate.[41] Crotty et al. conducted an observational cohort study of 284  
48 patients with viral pneumonias, in which the majority (51.8%) were immunocompromised, with a  
49 high overall in-hospital mortality rate (23.2%).[42] In our study, the 90-day mortality rate was  
50 24.2% for patients with non-CMV viral pneumonias, which was similar to patients with CMV  
51  
52  
53  
54  
55  
56  
57  
58  
59  
60

1  
2  
3 pneumonia (27.4%), but significantly lower than patients with PCP (38.1%,  $P < 0.05$ ). Therefore,  
4 it is of vital importance to include viral pathogens in the differential diagnosis of pneumonia in  
5 patients on glucocorticoids. Also, the presence of ground-glass lesions on CT imaging should  
6 prompt consideration of PCP and viral infections. Viral nucleic acid and PCP testing should be  
7 obtained, and targeted antimicrobial treatment should be started as early as possible.  
8  
9  
10  
11  
12

13 Overall mortality from pulmonary infections in patients receiving long-term glucocorticoid  
14 therapy can be as high as 45%,<sup>[1]</sup> with similar rates in patients with other causes for  
15 immunosuppression.<sup>[21]</sup> Development of respiratory failure and the need for mechanical  
16 ventilation have been shown to be the strongest predictors of mortality in immunocompromised  
17 patients with or without pneumonia.<sup>[43, 44]</sup> Lymphocytopenia has also been shown to be  
18 significantly associated with increased mortality rates in non-HIV-infected patients with PCP or  
19 viral pneumonias.<sup>[29, 45]</sup> Vial-Dupuy et al. indicated that high-dose steroid use during an ICU  
20 stay (OR = 0.19; [95% CI, 0.04-0.99]) was an independent determinant of in-hospital mortality in  
21 patients with interstitial lung disease admitted to the ICU.<sup>[46]</sup> Kotani et al.'s study indicated that  
22 interstitial lung disease was a risk factor associated with mortality in patients with PCP who  
23 required mechanical ventilation.<sup>[47]</sup> Our study demonstrated that several factors conveyed a poor  
24 prognosis in this patient population, including high-dose glucocorticoid use, persistent  
25 lymphocytopenia, and interstitial lung disease.  
26  
27  
28  
29  
30  
31  
32  
33  
34  
35  
36  
37

38 There were several limitations to this study. First, it had a retrospective observational design,  
39 which might have introduced some bias by indication. Second, not all patients with pneumonia  
40 underwent a full array of pathogenic testing; thus, pathogen identification and diagnosis may have  
41 been incomplete. Third, some pathogens were not identified until at least 48 hours after admission,  
42 increasing the possibility of nosocomial infections. Despite these limitations, our results are  
43 consistent with the existing literature and provide more detailed insights into the clinical  
44 characteristics, pathogenic aetiologies, and prognostic factors that should be carefully considered  
45 when managing patients on glucocorticoid therapy who develop pneumonia.  
46  
47  
48  
49  
50  
51  
52  
53  
54  
55

## 56 CONCLUSIONS

57 Patients who develop pneumonia while receiving glucocorticoid therapy experience high  
58 rates of infection by opportunistic pathogens, significant morbidity, and high mortality rates,  
59  
60

1  
2  
3 especially with specific risk factors. This information should be carefully considered when  
4  
5 determining treatment strategies for this patient population.  
6  
7

## 8 9 **DISCLOSURES**

10  
11 **Funding:** This work was supported by the Ministry of Science and Technology Support Program  
12 (Grant: 2015BAI12B11) and the Beijing Science and Technology Commission Key Project  
13 (Grant: D151100002115004)  
14  
15

16  
17 **Contributors:** Study design: LL, BC. Data collection: LL, JS, LS, GS, LS, LZ, CW, YR, JW,  
18 JP, JL. Statistical analysis: LL, SH.H, GX. Writing: LL, BC, SH.H. All authors take full  
19 responsibility for the study design, data analysis and interpretation, and preparation of the  
20 manuscript. All authors approved the final draft of the manuscript.  
21  
22

23  
24 **Competing interests:** None declared.  
25

26  
27 **Ethics approval:** The Ethics Committee of China-Japan Friendship Hospital (no. 2015-86)  
28 granted approval for this retrospective study and orchestrated centralised collaboration and  
29 approval of all participating institutions.  
30  
31

32  
33 **Patient consent:** Consent for procedures was obtained from all patients. The need for written  
34 informed patient consent for participation in this study was waived by the Ethics Committee of  
35 China-Japan Friendship Hospital in collaboration with all participating institutions, with  
36 submission and collection of anonymised data.  
37  
38

39  
40 **Provenance and peer review:** Not commissioned; externally peer reviewed.  
41

42  
43 **Data sharing statement:** Extra data can be accessed via the Dryad data repository at  
44 <http://datadryad.org/> with the doi:10.5061/dryad.mkkwh70x2  
45  
46

## 47 48 **REFERENCES**

- 49  
50 1. Agustí C, Rañó A, Filella X, et al. Pulmonary infiltrates in patients receiving long-term glucocorticoid  
51 Treatment-Aetiology, prognostic factors, and associated inflammatory response. *Chest* 2003; 123(2): 488-98.  
52  
53 2. Ajmal S, Mahmood M, Saleh OA, et al. Invasive fungal infections associated with prior respiratory viral  
54 infections in immunocompromised hosts. *Infection* 2018; 46(4): 555-58.  
55  
56 3. Fillâtre P, Revest M, Belaz S, et al. Pneumocystosis in non-HIV-infected immunocompromised patients. *Rev*  
57 *Med Interne* 2016; 37(5): 327-36.  
58  
59 4. Kofteridis DP, Aalachis A, Velegraki M, et al. Predisposing factors, clinical characteristics and outcome of  
60 Pneumocystis jirovecii pneumonia in HIV-negative patients. *J Infect Chemother* 2014; 20(7): 412-6.



5. American Thoracic Society, Infectious Diseases Society of America. Guidelines for the management of adults with hospital-acquired, ventilator-associated, and healthcare-associated pneumonia. *Am J Respir Crit Care Med* 2015; 171(40): 388-416.
6. Sousa D, Justo I, Domínguez A, et al. Community-acquired pneumonia in immunocompromised older patients: incidence, causative organisms and outcome. *Clin Microbiol Infect* 2013; 19(2): 187-92.
7. Jouneau S, Poineuf JS, Minjolle S, et al. Which patients should be tested for viruses on bronchoalveolar lavage fluid? *Eur J Clin Microbiol Infect Dis* 2013; 32(5): 671-7.
8. Silva DR, Menegotto DM, Schulz LF, et al. Clinical characteristics and evolution of non-HIV-infected immunocompromised patients with an in-hospital diagnosis of tuberculosis. *J Bras Pneumol* 2010; 36(4): 475-84.
9. Kofteridis DP, Valachis A, Velegraki M, et al. Predisposing factors, clinical characteristics and outcome of *Pneumocystis jirovecii* pneumonia in HIV-negative patients. *J Infect Chemother* 2014; 20: 412-6.
10. Marti C, Garin N, Grosgrain O, et al. Prediction of severe community-acquired pneumonia: a systematic review and meta-analysis. *Crit Care* 2012;16(4): R141.
11. Kwok CS, Loke YK, Woo K, et al. Risk prediction models for mortality in community-acquired pneumonia: a systematic review. *Biomed Res Int* 2013; 2013(10): 504136.
12. Furtado GH, Wiskirchen DE, Kufi JL, et al. Performance of the PIRO score for predicting mortality in patients with ventilator-associated pneumonia. *Anaesth Intensive Care* 2012; 40(2): 285-291.
13. Aliberti S, Cilloniz C, Chalmers J D, et al. Multidrug-resistant pathogens in hospitalized patients coming from the community with pneumonia: a European perspective. *Thorax* 2013; 68(11): 997-999.
14. Magiorakos AP, Srinivasan A, Carey RB, et al. Multidrug-resistant, extensively drug-resistant and pan drug-resistant bacteria: an international expert proposal for interim standard definitions for acquired resistance. *Clin Microbiol Infect* 2012; 18(3): 268-281.
15. Schauwvlieghe AFAD, Rijnders BJA, Nele P, et al. Invasive aspergillosis in patients admitted to the intensive care unit with severe influenza: a retrospective cohort study. *Lancet Respir Med* 2018; 6(10): 782-92.
16. Patterson TF, Thompson GR 3rd, Denning DW, et al. Practice Guidelines for the Diagnosis and Management of Aspergillosis: 2016 Update by the Infectious Diseases Society of America. *Clin Infect Dis* 2016; 63(4): e1-e60.
17. Guo F, Chen Y, Yang S L, et al. *Pneumocystis* Pneumonia in HIV-Infected and Immunocompromised Non-HIV Infected Patients: A Retrospective Study of Two Centers in China. *Plos One* 2014; 9(7): e101943.
18. Kim T, Park SY, Lee HJ, et al. Assessment of cytomegalovirus and cell-mediated immunity for predicting outcomes in non-HIV-infected patients with *Pneumocystis jirovecii* pneumonia. *Medicine (Baltimore)* 2017; 96(30): e7243.
19. Brownback KR, Pitts LR, Simpson SQ. Utility of galactomannan antigen detection in bronchoalveolar lavage fluid in immunocompromised patients. *Mycoses* 2013; 56(5): 552-8.
20. Ajmal S, Mahmood M, Abu Saleh O, et al. Invasive fungal infections associated with prior respiratory viral infections in immunocompromised hosts. *Infection* 2018; 46(4): 555-8.
21. Rañó A, Agustí C, Jimenez P, et al. Pulmonary infiltrates in non-HIV immunocompromised patients: a diagnostic approach using non-invasive and bronchoscopic procedures. *Thorax* 2001; 56(5): 379-87.
22. Jolis R, Castella J, Puzo C, et al. Diagnostic value of protected BAL in diagnosing pulmonary infections in immunocompromised patients. *Chest* 1996; 109(3): 601-7.
23. Eyüboğlu FÖ, Küpeli E, Bozbaş SS, et al. Evaluation of pulmonary infections in solid organ transplant patients: 12 years of experience. *Transplant Proc* 2013; 45(10): 3458-61.
24. Di Pasquale MF, Sotgiu G, Gramegna A, et al. Prevalence and Etiology of Community-acquired Pneumonia in Immunocompromised Patients. *Clin Infect Dis* 2019; 68(9):1482-93.
25. Popova VV, Shilov EM, Kornev BM, et al. Development of mixed infection in patient with nephrotic

- 1  
2  
3 syndrome on immunosuppressive therapy. *Ter Arkh* 1998; 70(6): 56-7.
- 4 26. Qureshi S, Pandey A, Sirohi TR, et al. Mixed pulmonary infection in an immunocompromised patient: a rare  
5 case report. *Indian J Med Microbiol* 2014; 32(1): 79-81.
- 6 27. Hamadani M, Jr B D, Blum W, et al. Pulmonary Nocardia and Aspergillus co-infection in a patient with  
7 chronic graft-versus-host disease. *Transpl Infect Dis* 2010; 10(1): 24-6.
- 8 28. Williams KM, Ahn KW, Chen M, et al. The incidence, mortality and timing of Pneumocystis jirovecii  
9 pneumonia after hematopoietic cell transplantation: a CIBMTR analysis. *Bone Marrow Transplant* 2016; 51(4):  
10 573-80.
- 11 29. Chia-Jung Liu, Tai-Fen Lee, Sheng-Yuan Ruan, et al. Clinical characteristics, treatment outcomes, and  
12 prognostic factors of Pneumocystis pneumonia in non-HIV-infected patients. *Infect Drug Resist* 2019; 12: 1457-  
13 67.
- 14 30. Nierenberg NE, Poutsika DD, Chow JK, et al. Pretransplant lymphopenia is a novel prognostic factor in  
15 cytomegalovirus and non-cytomegalovirus invasive infections after liver transplantation. *Liver Transpl* 2014;  
16 20(12): 1497-507.
- 17 31. Werbel WA, Ison MG, Angarone MP, et al. Lymphopenia is associated with late onset Pneumocystis jirovecii  
18 pneumonia in solid organ transplantation. *Transpl Infect Dis* 2018; 20(3): e12876.
- 19 32. Tadros S, Teichtahl AJ, Ciciriello S, et al. Pneumocystis jirovecii pneumonia in systemic autoimmune rheumatic  
20 disease: A case-control study. *Semin Arthritis Rheum* 2017; 46(6): 804-9.
- 21 33. Lee EH, Kim EY, Lee SH, et al. Risk factors and clinical characteristics of Pneumocystis jirovecii pneumonia  
22 in lung cancer. *Sci Rep* 2019; 9(1): 2094.
- 23 34. Lemiale V, Debrumetz A, Delannoy A, et al. Adjunctive steroid in HIV-negative patients with severe  
24 Pneumocystis pneumonia. *Respir Res* 2013; 14(1):87.
- 25 35. Tong J, Sun Z, Liu H, et al. Risk factors of CMV infection in patients after umbilical cord blood  
26 transplantation: a multicenter study in China. *Chin J Cancer Res* 2013; 25(6): 695-703.
- 27 36. Park JW, Curtis JR, Kim MJ, et al. Pneumocystis pneumonia in patients with rheumatic diseases receiving  
28 prolonged, non-high-dose steroids-clinical implication of primary prophylaxis using trimethoprim-  
29 sulfamethoxazole. *Arthritis Res Ther* 2019; 21(1): 207.
- 30 37. Yang CY, Yang AH, Yang WC, et al. Risk factors for Pneumocystis jirovecii pneumonia in glomerulonephritis  
31 patients receiving immunosuppressants. *Intern Med* 2012; 51(20): 2869-75.
- 32 38. Philippe B, Ibrahim-Granet O, Prévost M C. et al. Killing of Aspergillus fumigatus by alveolar macrophages is  
33 mediated by reactive oxidant intermediates. *Infect Immun* 2003; 71(6): 3034-42.
- 34 39. Jacobs SE, Lamson DM, Soave R, et al. Clinical and molecular epidemiology of human rhinovirus infections in  
35 patients with hematologic malignancy. *J Clin Virol* 2015; 71: 51-8.
- 36 40. Shah DP, Shah PK, Azzi JM, et al. Parainfluenza virus infections in hematopoietic cell transplant recipients and  
37 hematologic malignancy patients: A systematic review. *Cancer Lett* 2016; 370(2): 358-64.
- 38 41. Chatzis O, Darbre S, Pasquier J, et al. Burden of severe RSV disease among immunocompromised children and  
39 adults: a 10 year retrospective study. *BMC Infect Dis* 2018; 18(1): 111.
- 40 42. Crotty MP, Meyers S, Hampton N, et al. Epidemiology, Co-Infections, and Outcomes of Viral Pneumonia in  
41 Adults: An Observational Cohort Study. *Medicine (Baltimore)* 2015; 94(50): e2332.
- 42 43. Rañó A, Agustí C, Benito N, et al. Prognostic factors of non-HIV immunocompromised patients with  
43 pulmonary infiltrates. *Chest* 2002; 122(1): 253-61.
- 44 44. Azoulay E, Pickkers P, Soares M, et al. Acute hypoxemic respiratory failure in immunocompromised patients:  
45 the Efraim multinational prospective cohort study. *Intensive Care Med* 2017; 43(12): 1808-1819.
- 46 45. Shi SJ, Li H, Liu M, et al. Mortality prediction to hospitalized patients with influenza pneumonia: PO<sub>2</sub> /FiO<sub>2</sub>

1  
2  
3 combined lymphocyte count is the answer. *Clin Respir J* 2017; 11(3): 352-360.

4 46. Vial-Dupuy A, Sanchez O, Douvry B, et al. Outcome of patients with interstitial lung disease admitted to the  
5 intensive care unit. *Sarcoidosis Vasc Diffuse Lung Dis* 2013;30(2): 134-42.

6 47. Kotani T, Katayama S, Miyazaki Y, et al. Risk Factors for the Mortality of Pneumocystis jirovecii Pneumonia  
7 in Non-HIV Patients Who Required Mechanical Ventilation: A Retrospective Case Series Study. *Biomed Res Int*  
8 2017; 2017: 7452604.  
9  
10

## 11 12 13 **FIGURE LEGENDS**

14 Figure 1: Study flowchart

15  
16 Figure 2: Duration of glucocorticoid use among glucocorticoid users with pneumonia

17  
18 Figure 3: Duration of glucocorticoid use among glucocorticoid only users with pneumonia

19  
20 Figure 4: Duration of glucocorticoid use among glucocorticoid and immunosuppressant users with  
21 pneumonia  
22  
23  
24  
25  
26  
27  
28  
29  
30  
31  
32  
33  
34  
35  
36  
37  
38  
39  
40  
41  
42  
43  
44  
45  
46  
47  
48  
49  
50  
51  
52  
53  
54  
55  
56  
57  
58  
59  
60



## Time chart of infection

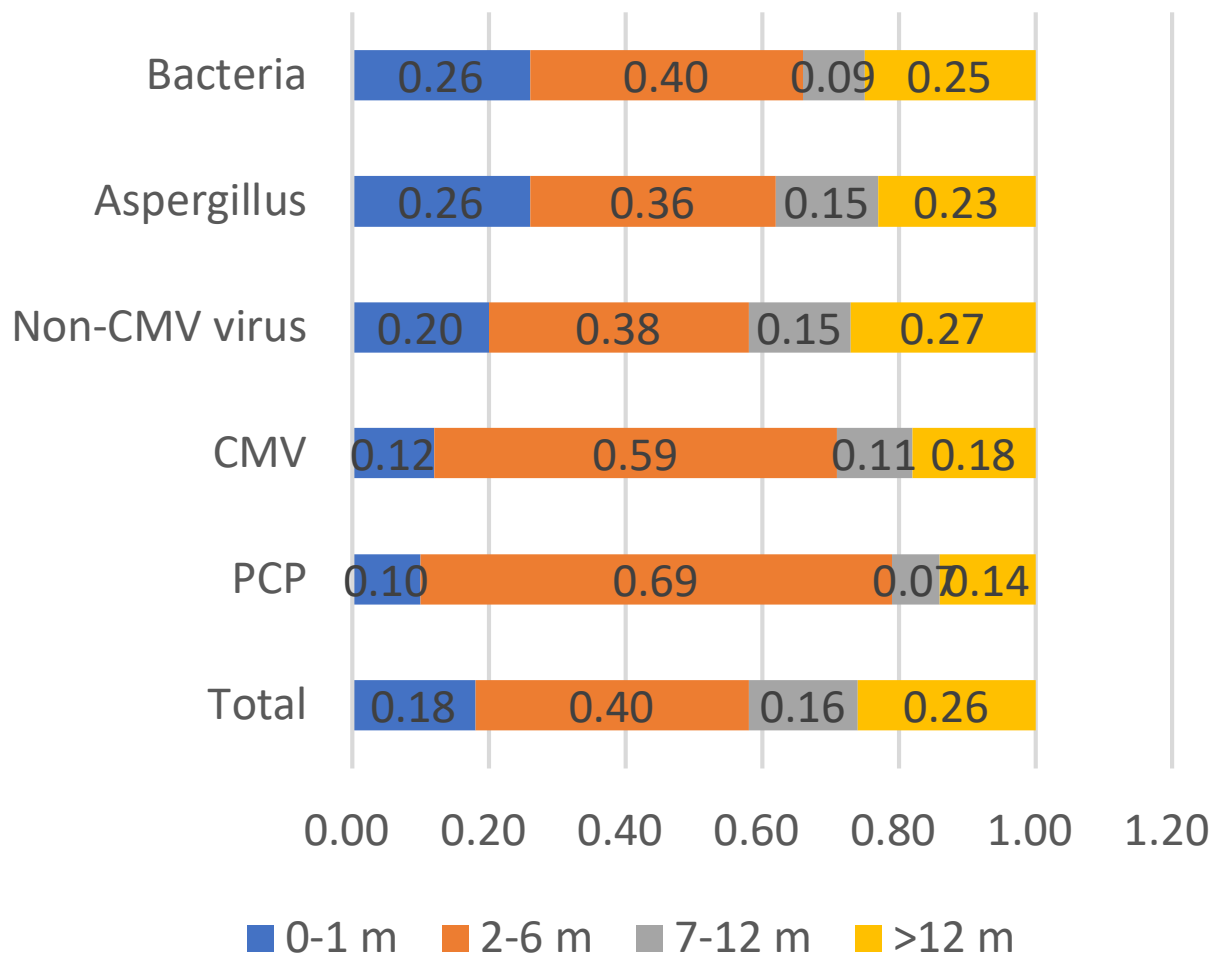

1  
2  
3  
4  
5  
6  
7  
8  
9  
10  
11  
12  
13  
14  
15  
16  
17  
18  
19  
20  
21  
22  
23  
24  
25  
26  
27  
28  
29  
30  
31  
32  
33  
34  
35  
36  
37  
38  
39  
40  
41  
42  
43  
44  
45  
46  
47  
48  
49  
50  
51  
52  
53  
54  
55  
56  
57  
58  
59  
60

## Time chart of infection

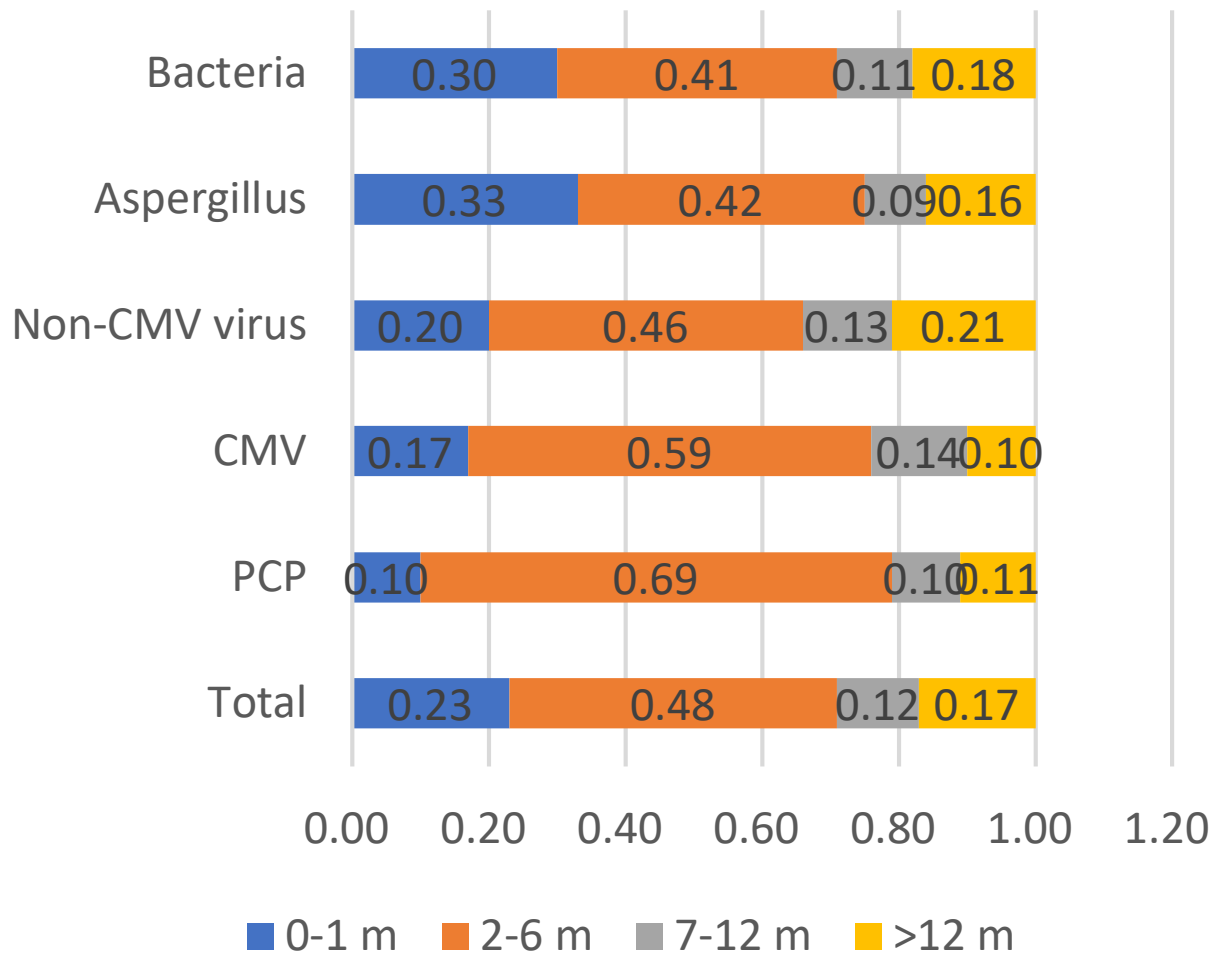

1  
2  
3  
4  
5  
6  
7  
8  
9  
10  
11  
12  
13  
14  
15  
16  
17  
18  
19  
20  
21  
22  
23  
24  
25  
26  
27  
28  
29  
30  
31  
32  
33  
34  
35  
36  
37  
38  
39  
40  
41  
42  
43  
44  
45  
46  
47  
48  
49  
50  
51  
52  
53  
54  
55  
56  
57  
58  
59  
60

## Time chart of infection

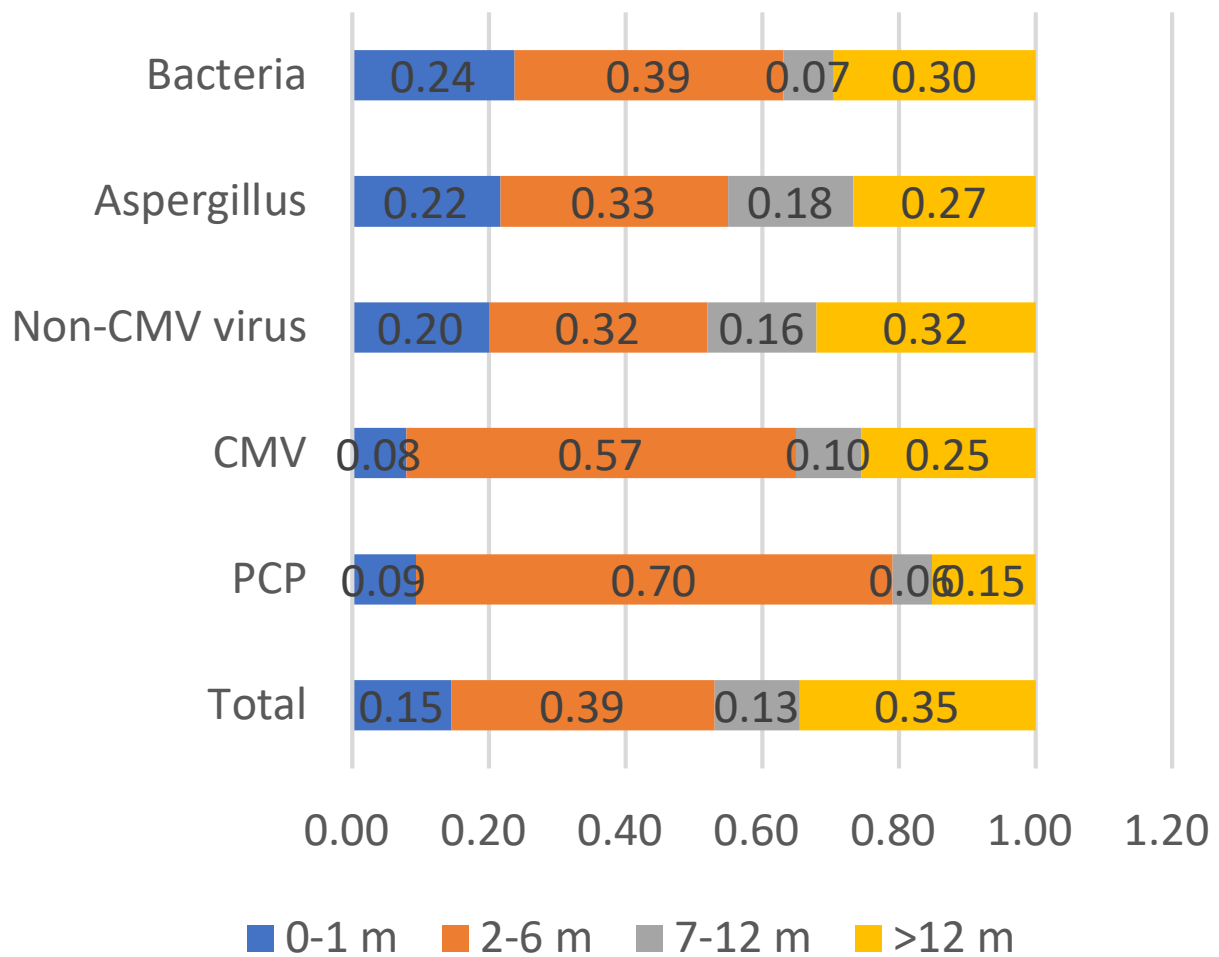

STROBE Statement—Checklist of items that should be included in reports of *cohort studies*

|                              | Item No | Recommendation                                                                                                                                                                                                                                                                                                         | Page No        |
|------------------------------|---------|------------------------------------------------------------------------------------------------------------------------------------------------------------------------------------------------------------------------------------------------------------------------------------------------------------------------|----------------|
| <b>Title and abstract</b>    | 1       | (a) Indicate the study's design with a commonly used term in the title or the abstract<br>(b) Provide in the abstract an informative and balanced summary of what was done and what was found                                                                                                                          | 1-2            |
| <b>Introduction</b>          |         |                                                                                                                                                                                                                                                                                                                        |                |
| Background/rationale         | 2       | Explain the scientific background and rationale for the investigation being reported                                                                                                                                                                                                                                   | 2-3            |
| Objectives                   | 3       | State specific objectives, including any prespecified hypotheses                                                                                                                                                                                                                                                       | 2-3            |
| <b>Methods</b>               |         |                                                                                                                                                                                                                                                                                                                        |                |
| Study design                 | 4       | Present key elements of study design early in the paper                                                                                                                                                                                                                                                                |                |
| Setting                      | 5       | Describe the setting, locations, and relevant dates, including periods of recruitment, exposure, follow-up, and data collection                                                                                                                                                                                        |                |
| Participants                 | 6       | (a) Give the eligibility criteria, and the sources and methods of selection of participants. Describe methods of follow-up<br>(b) For matched studies, give matching criteria and number of exposed and unexposed                                                                                                      | 4-5            |
| Variables                    | 7       | Clearly define all outcomes, exposures, predictors, potential confounders, and effect modifiers. Give diagnostic criteria, if applicable                                                                                                                                                                               | 4-5            |
| Data sources/<br>measurement | 8*      | For each variable of interest, give sources of data and details of methods of assessment (measurement). Describe comparability of assessment methods if there is more than one group                                                                                                                                   | 4-5            |
| Bias                         | 9       | Describe any efforts to address potential sources of bias                                                                                                                                                                                                                                                              | -              |
| Study size                   | 10      | Explain how the study size was arrived at                                                                                                                                                                                                                                                                              | 4              |
| Quantitative variables       | 11      | Explain how quantitative variables were handled in the analyses. If applicable, describe which groupings were chosen and why                                                                                                                                                                                           | 5              |
| Statistical methods          | 12      | (a) Describe all statistical methods, including those used to control for confounding<br>(b) Describe any methods used to examine subgroups and interactions<br>(c) Explain how missing data were addressed<br>(d) If applicable, explain how loss to follow-up was addressed<br>(e) Describe any sensitivity analyses | 6              |
| <b>Results</b>               |         |                                                                                                                                                                                                                                                                                                                        |                |
| Participants                 | 13*     | (a) Report numbers of individuals at each stage of study—eg numbers potentially eligible, examined for eligibility, confirmed eligible, included in the study, completing follow-up, and analysed<br>(b) Give reasons for non-participation at each stage<br>(c) Consider use of a flow diagram                        | 7 and Figure 1 |
| Descriptive data             | 14*     | (a) Give characteristics of study participants (eg demographic, clinical, social) and information on exposures and potential confounders<br>(b) Indicate number of participants with missing data for each variable of interest<br>(c) Summarise follow-up time (eg, average and total amount)                         | 7-8            |
| Outcome data                 | 15*     | Report numbers of outcome events or summary measures over time                                                                                                                                                                                                                                                         | 7-8            |



|    |                          |    |                                                                                                                                                                                                              |              |
|----|--------------------------|----|--------------------------------------------------------------------------------------------------------------------------------------------------------------------------------------------------------------|--------------|
| 1  | Main results             | 16 | (a) Give unadjusted estimates and, if applicable, confounder-adjusted estimates and their precision (eg, 95% confidence interval). Make clear which confounders were adjusted for and why they were included | 7-8          |
| 2  |                          |    | (b) Report category boundaries when continuous variables were categorized                                                                                                                                    |              |
| 3  |                          |    | (c) If relevant, consider translating estimates of relative risk into absolute risk for a meaningful time period                                                                                             |              |
| 4  |                          |    |                                                                                                                                                                                                              |              |
| 5  |                          |    |                                                                                                                                                                                                              |              |
| 6  |                          |    |                                                                                                                                                                                                              |              |
| 7  |                          |    |                                                                                                                                                                                                              |              |
| 8  |                          |    |                                                                                                                                                                                                              |              |
| 9  | Other analyses           | 17 | Report other analyses done—eg analyses of subgroups and interactions, and sensitivity analyses                                                                                                               | 7-8, Table 3 |
| 10 |                          |    |                                                                                                                                                                                                              |              |
| 11 | <b>Discussion</b>        |    |                                                                                                                                                                                                              |              |
| 12 |                          |    |                                                                                                                                                                                                              |              |
| 13 | Key results              | 18 | Summarise key results with reference to study objectives                                                                                                                                                     | 9            |
| 14 | Limitations              | 19 | Discuss limitations of the study, taking into account sources of potential bias or imprecision. Discuss both direction and magnitude of any potential bias                                                   | 11-12        |
| 15 |                          |    |                                                                                                                                                                                                              |              |
| 16 | Interpretation           | 20 | Give a cautious overall interpretation of results considering objectives, limitations, multiplicity of analyses, results from similar studies, and other relevant evidence                                   | 9-11         |
| 17 |                          |    |                                                                                                                                                                                                              |              |
| 18 |                          |    |                                                                                                                                                                                                              |              |
| 19 | Generalisability         | 21 | Discuss the generalisability (external validity) of the study results                                                                                                                                        | 9-11         |
| 20 |                          |    |                                                                                                                                                                                                              |              |
| 21 | <b>Other information</b> |    |                                                                                                                                                                                                              |              |
| 22 | Funding                  | 22 | Give the source of funding and the role of the funders for the present study and, if applicable, for the original study on which the present article is based                                                | 12           |
| 23 |                          |    |                                                                                                                                                                                                              |              |
| 24 |                          |    |                                                                                                                                                                                                              |              |

25  
26 \*Give information separately for exposed and unexposed groups.

27  
28 **Note:** An Explanation and Elaboration article discusses each checklist item and gives methodological background and published examples of transparent reporting. The STROBE checklist is best used in conjunction with this article (freely available on the Web sites of PLoS Medicine at <http://www.plosmedicine.org/>, Annals of Internal Medicine at <http://www.annals.org/>, and Epidemiology at <http://www.epidem.com/>). Information on the STROBE Initiative is available at <http://www.strobe-statement.org>.

29  
30  
31  
32  
33  
34  
35  
36  
37  
38  
39  
40  
41  
42  
43  
44  
45  
46  
47  
48  
49  
50  
51  
52  
53  
54  
55  
56  
57  
58  
59  
60
